# Supplementary material for: Stille cross-coupling of secondary and tertiary α-(trifluoromethyl)-benzyl chlorides with allylstannanes
Source: Royal Society of Chemistry journal article supplement (doi:10.1039/c8cc03541e), 2018-01-01

## Electronic Supplementary Information

### Stille cross-coupling of secondary and tertiary $\alpha$ -(trifluoromethyl)benzyl chlorides with allylstannanes

Nagender Punna,<sup>a</sup> Kyosuke Harada,<sup>a</sup> and Norio Shibata<sup>\*ab</sup>

<sup>a</sup> Department of Nanopharmaceutical Sciences & Department of Life Science and Applied Chemistry,  
Nagoya Institute of Technology, Gokiso, Showa-ku, Nagoya 466-8555, Japan.

<sup>b</sup> Institute of Advanced Fluorine-Containing Materials, Zhejiang Normal University, 688 Yingbin Avenue,  
321004 Jinhua, China.

[nozshiba@nitech.ac.jp](mailto:nozshiba@nitech.ac.jp)

## Table of contents

|                                                                                                           |     |
|-----------------------------------------------------------------------------------------------------------|-----|
| 1. General information.....                                                                               | S3  |
| 2. Optimization studies of Stille coupling reaction.....                                                  | S4  |
| a) Screening of pseudohalide and secondary alkyl halide ( <b>Table S1</b> ).....                          | S4  |
| b) Screening of solvents ( <b>Table S2</b> ).....                                                         | S4  |
| c) Ligand screening ( <b>Table S3</b> ).....                                                              | S5  |
| d) Catalyst screening ( <b>Table S4</b> ).....                                                            | S5  |
| 3. <sup>19</sup> F NMR studies to observe the progress of the Stille coupling reaction.....               | S6  |
| 4. LC-MS analysis of CF <sub>3</sub> -Pd- $\pi$ -benzyl complex IV.....                                   | S8  |
| 5. General experimental procedure for the synthesis of compound <b>1</b> & <b>4</b> .....                 | S9  |
| 6. Typical procedure for the preparation of Stille-coupling products <b>3</b> , <b>5</b> & <b>7</b> ..... | S11 |
| 7. Application of compound <b>3f</b> .....                                                                | S25 |
| 8. References.....                                                                                        | S27 |
| 9. NMR Data.....                                                                                          | S28 |

## 1. General information:

All reactions were performed in oven-dried glassware under a positive pressure of nitrogen or argon. Solvents were transferred via syringe and were introduced into the reaction vessels through a rubber septum. All solvents were dried by standard method. All of the reactions were monitored by thin-layer chromatography (TLC) carried out on 0.25 mm Merck silica gel (60-F<sub>254</sub>). The TLC plates were visualized with UV light and 7% phosphomolybdic acid or KMnO<sub>4</sub> in water/heat or *p*-anisaldehyde solution/heat. All of the reaction products were purified by column chromatography. Column chromatography was carried out on a column packed with silica gel 60N spherical neutral size 50-63  $\mu$ m. The <sup>1</sup>H NMR (300 MHz and 500 MHz) and <sup>19</sup>F NMR (282 MHz) spectra (with hexafluorobenzene ( $\delta$  ppm –162.2) as an internal standard) as for solution in CDCl<sub>3</sub> and DMSO were recorded on a Varian Mercury 300 and BRUKER 500 Ultra Shield TR. <sup>13</sup>C NMR (125.8 MHz) spectra for solution in CDCl<sub>3</sub> was recorded on a BRUKER 500 Ultra Shield TR. Chemical shifts ( $\delta$ ) are expressed in ppm downfield from internal TMS or C<sub>6</sub>F<sub>6</sub>. Chemical shifts ( $\delta$ ) are reported in ppm, and coupling constants (J) are in hertz (Hz). The following abbreviations were used to explain the multiplicities: s = singlet, d = doublet, t = triplet, q = quartet, m = multiplet, br = broad. Mass spectra were recorded on a SHIMADZU GCMS-QP5050A (EI-MS) and SHIMADZU LCMS-2020 (ESI-MS).

Commercially available chemicals were obtained from Aldrich Chemical Co., Alfa Aesar, TCI, Ark Farm and used as received unless otherwise stated. The residual solvent signals were used as references (TMS:  $\delta$  H = 0.00 ppm,  $\delta$  C = 77.16 ppm; and C<sub>6</sub>F<sub>6</sub>:  $\delta$  F = –162.2 ppm). High resolution mass spectrometry (HRMS) was carried out on an electron impact ionization mass spectrometer with a micro-TOF analyzer.

## 2. Optimization studies of Stille coupling reaction

a) Table S1. Screening of pseudohalide and secondary alkyl halide<sup>a</sup>

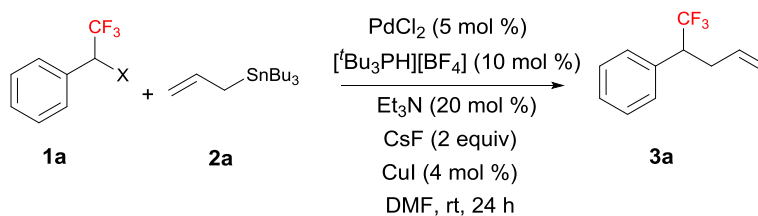

| Entry | X        | Yield <sup>b</sup> [%] |
|-------|----------|------------------------|
| 1     | OTs      | -                      |
| 2     | OBoc     | -                      |
| 3     | OC(O)OMe | -                      |
| 4     | Cl       | 31                     |

<sup>a</sup> Experiments were performed with **1a** (0.5 mmol), **2a** (0.65 mmol) and PdCl<sub>2</sub>/[tBu<sub>3</sub>PH][BF<sub>4</sub>]/Et<sub>3</sub>N (ratio: 1/2/4 mol %) in DMF (1.25 mL). <sup>b</sup> Yields refer to <sup>19</sup>F NMR yields, for which PhCF<sub>3</sub> was used as internal standard.

b) Table S2. Screening of solvents<sup>a</sup>

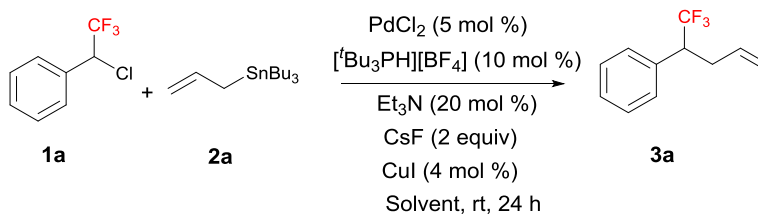

| Entry | Solvent            | Yield <sup>b</sup> [%] |
|-------|--------------------|------------------------|
| 1     | DMF                | 31                     |
| 2     | THF                | NR                     |
| 3     | DCM                | trace                  |
| 4     | Toluene            | trace                  |
| 5     | DMSO               | 11                     |
| 6     | CH <sub>3</sub> CN | 25                     |

<sup>a</sup> Experiments were performed with **1** (0.5 mmol), **2** (0.65 mmol) and PdCl<sub>2</sub>/[tBu<sub>3</sub>PH][BF<sub>4</sub>]/Et<sub>3</sub>N (ratio: 1/2/4 mol %) in solvent (1.25 mL). <sup>b</sup> Yields refer to <sup>19</sup>F NMR yields, for which PhCF<sub>3</sub> was used as internal standard.

**c) Table S3. Ligand screening<sup>a</sup>**

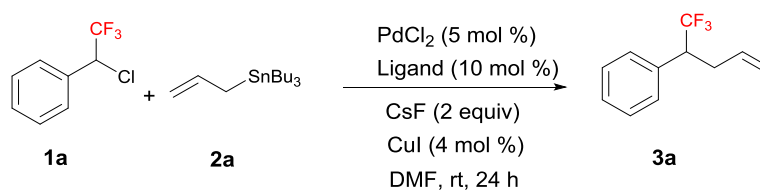

| Entry          | Ligand                                               | Yield <sup>b</sup> [%] |
|----------------|------------------------------------------------------|------------------------|
| 1 <sup>c</sup> | [ <sup>t</sup> Bu <sub>3</sub> PH][BF <sub>4</sub> ] | 31                     |
| 2              | Dppf                                                 | trace                  |
| 3              | Dppe                                                 | 3                      |
| 4              | Dppp                                                 | 4                      |
| 5              | PCy <sub>3</sub>                                     | 4                      |
| 6              | DPEphos                                              | 3                      |
| 7              | Xanthphos                                            | 2                      |

<sup>a</sup> Experiments were performed with **1** (0.5 mmol), **2** (0.65 mmol) and PdCl<sub>2</sub>/[<sup>t</sup>Bu<sub>3</sub>PH][BF<sub>4</sub>]/Et<sub>3</sub>N (ratio: 1/2/4 mol %) in DMF (1.25 mL). <sup>b</sup> Yields refer to <sup>19</sup>F NMR yields, for which PhCF<sub>3</sub> was used as internal standard. <sup>c</sup> Et<sub>3</sub>N (20 mol %) was used.

**d) Table S4. Catalyst screening<sup>a</sup>**

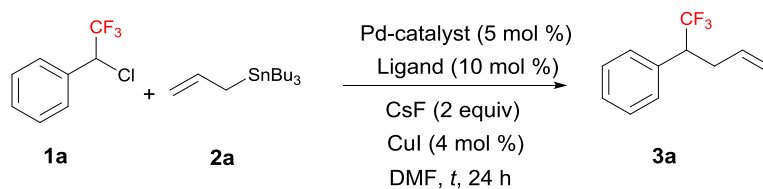

| Entry | Catalyst                                              | Ligand                                                                 | <i>T</i> (°C) | Yield <sup>b</sup> [%] |
|-------|-------------------------------------------------------|------------------------------------------------------------------------|---------------|------------------------|
| 1     | -                                                     | -                                                                      | 75            | -                      |
| 2     | Pd(PPh <sub>3</sub> ) <sub>4</sub>                    | -                                                                      | rt            | 5                      |
| 3     | Pd(OAc) <sub>2</sub>                                  | [ <sup>t</sup> Bu <sub>3</sub> PH][BF <sub>4</sub> ]/Et <sub>3</sub> N | rt            | 13                     |
| 4     | Pd <sub>2</sub> (dba) <sub>3</sub> •CHCl <sub>3</sub> | [ <sup>t</sup> Bu <sub>3</sub> PH][BF <sub>4</sub> ]/Et <sub>3</sub> N | rt            | 33                     |
| 5     | PdCl <sub>2</sub>                                     | [ <sup>t</sup> Bu <sub>3</sub> PH][BF <sub>4</sub> ]/Et <sub>3</sub> N | rt            | 31                     |

<sup>a</sup> Experiments were performed with **1** (0.5 mmol), **2** (0.65 mmol) and PdCl<sub>2</sub>/[<sup>t</sup>Bu<sub>3</sub>PH][BF<sub>4</sub>]/Et<sub>3</sub>N (ratio: 1/2/4 mol %) in DMF (1.25 mL). <sup>b</sup> Yields refer to <sup>19</sup>F NMR yields, for which PhCF<sub>3</sub> was used as internal standard. Et<sub>3</sub>N (20 mol %) was used.

### 3. $^{19}\text{F}$ NMR studies to observe the progress of the Stille coupling reaction

In a glove box, a flame dried NMR tube was charged with  $\text{PdCl}_2$  (0.05 equiv, 5 mol %), tri-*tert*-butylphosphine tetrafluoroborate (0.1 equiv, 10 mol %), triethylamine (0.2 equiv, 20 mol %) and 0.7 mL  $\text{DMF-}d_7$ , then stirred the mixture for 5 min at room temperature. After that added the (1-chloro-2,2,2-trifluoroethyl)benzene substrate **1a** (0.3 mmol, 1 equiv) and stirred at room temperature. Separately, recorded the  $^{19}\text{F}$  NMR of only (1-chloro-2,2,2-trifluoroethyl)benzene substrate **1a** [Figure S1 a)].  $^{19}\text{F}$  NMR spectra of the crude were recorded after 2h [Figure S1 b)]. Then, added allyltributylstannane (0.75 mmol, 2.5 equiv) and recorded  $^{19}\text{F}$  NMR spectra after 2h and 4h respectively [Figure S1 c)-d)]. After that, the reaction mixture was warmed up to 75 °C and recorded  $^{19}\text{F}$  NMR spectra after 10 min and 40 min respectively [Figure S1 e)-f)]. Reaction completed within 40 min.

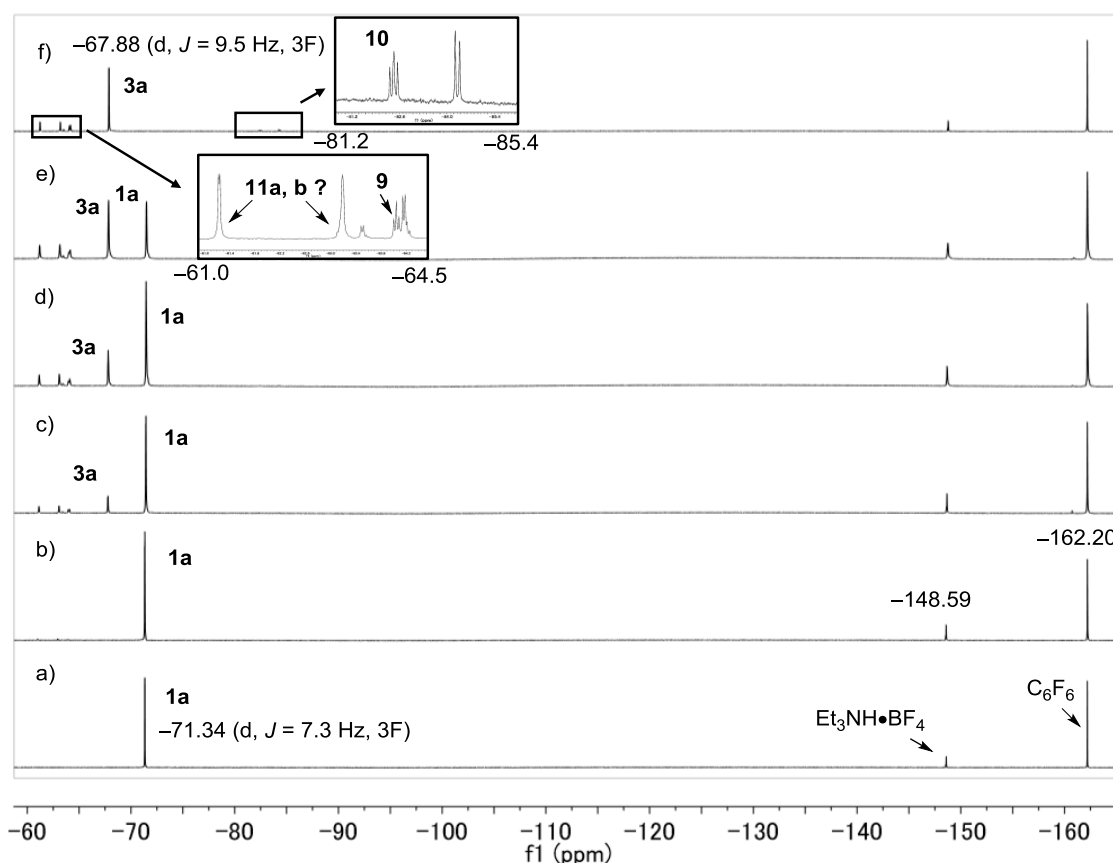

**Figure S1a.**  $^{19}\text{F}$  NMR investigation in between the reaction of **1a** and **2a** in  $\text{DMF-}d_7$ . a) **1a** b)  $\text{PdCl}_2/[\text{tBu}_3\text{PH}][\text{BF}_4]/\text{Et}_3\text{N}$  was added, at rt for 2h. c) **2a** was added, at rt for 2h. d) at rt for 4h. e) at 75 °C for 10 min. f) at 75 °C for 40 min.

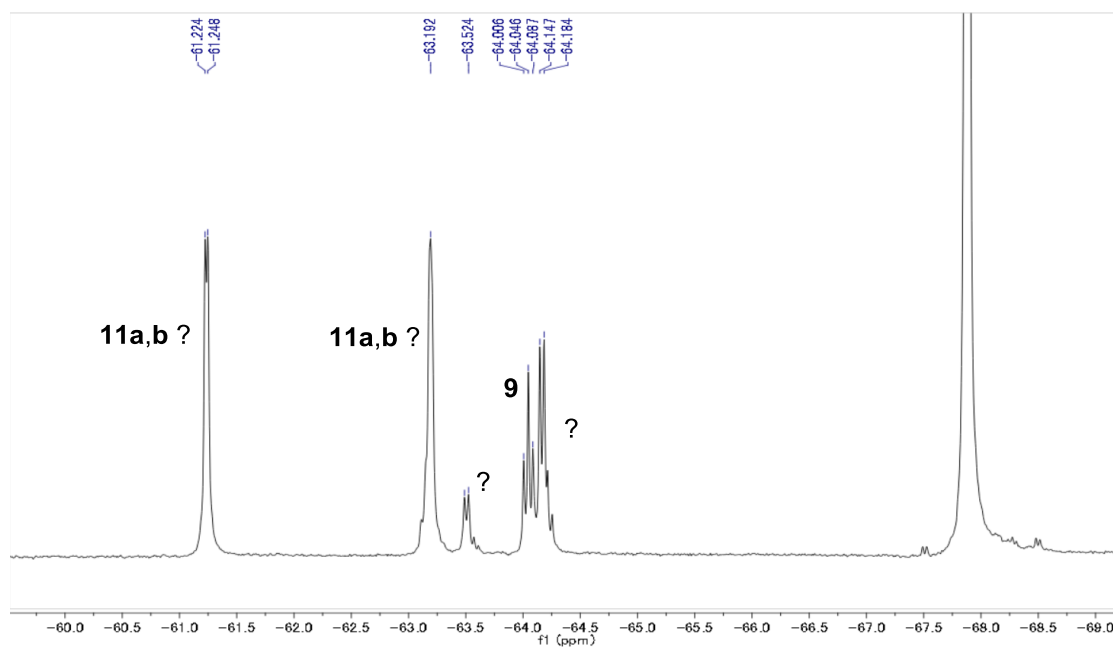

**Figure S1b.** Expanded  $^{19}\text{F}$  NMR Spectra.

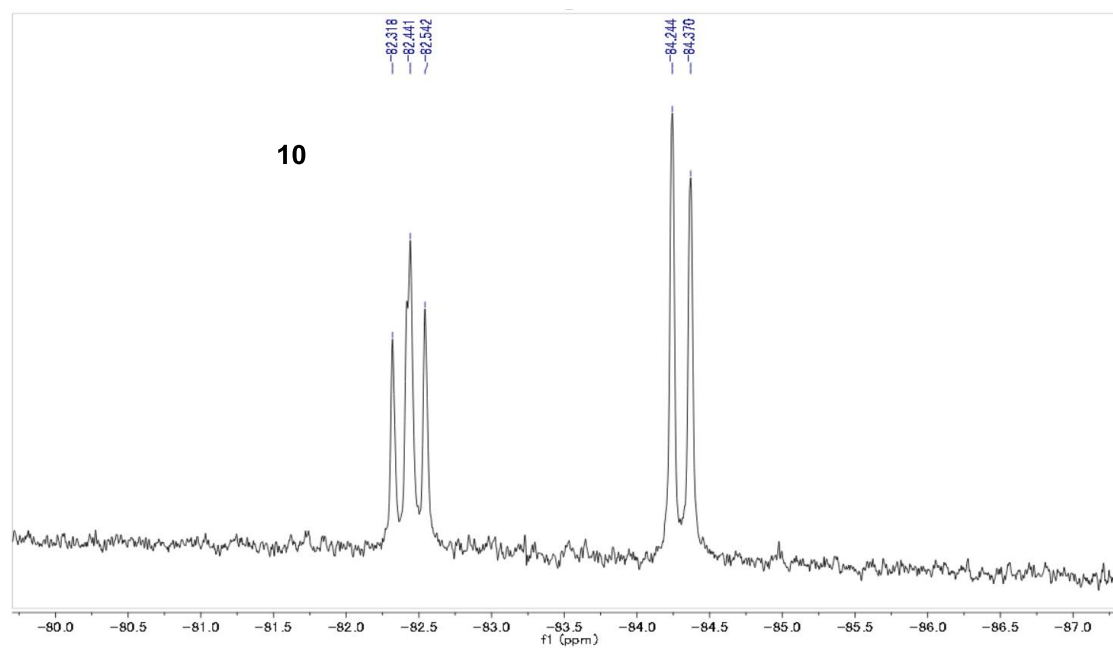

**Figure S1c.** Expanded  $^{19}\text{F}$  NMR Spectra.

#### 4. LC-MS analysis of CF<sub>3</sub>-Pd- $\pi$ -benzyl complex III

LC-MS analysis confirmed that CF<sub>3</sub>-Pd- $\pi$ -benzyl complex III was confirmed during the progress of the reaction. LC-MS (ESI,  $m/z$ ): [M+H]<sup>+</sup> 597.15 (isotopic pattern) (Figure S2)

2018/03/10 22:06:49 Page 1 / 1

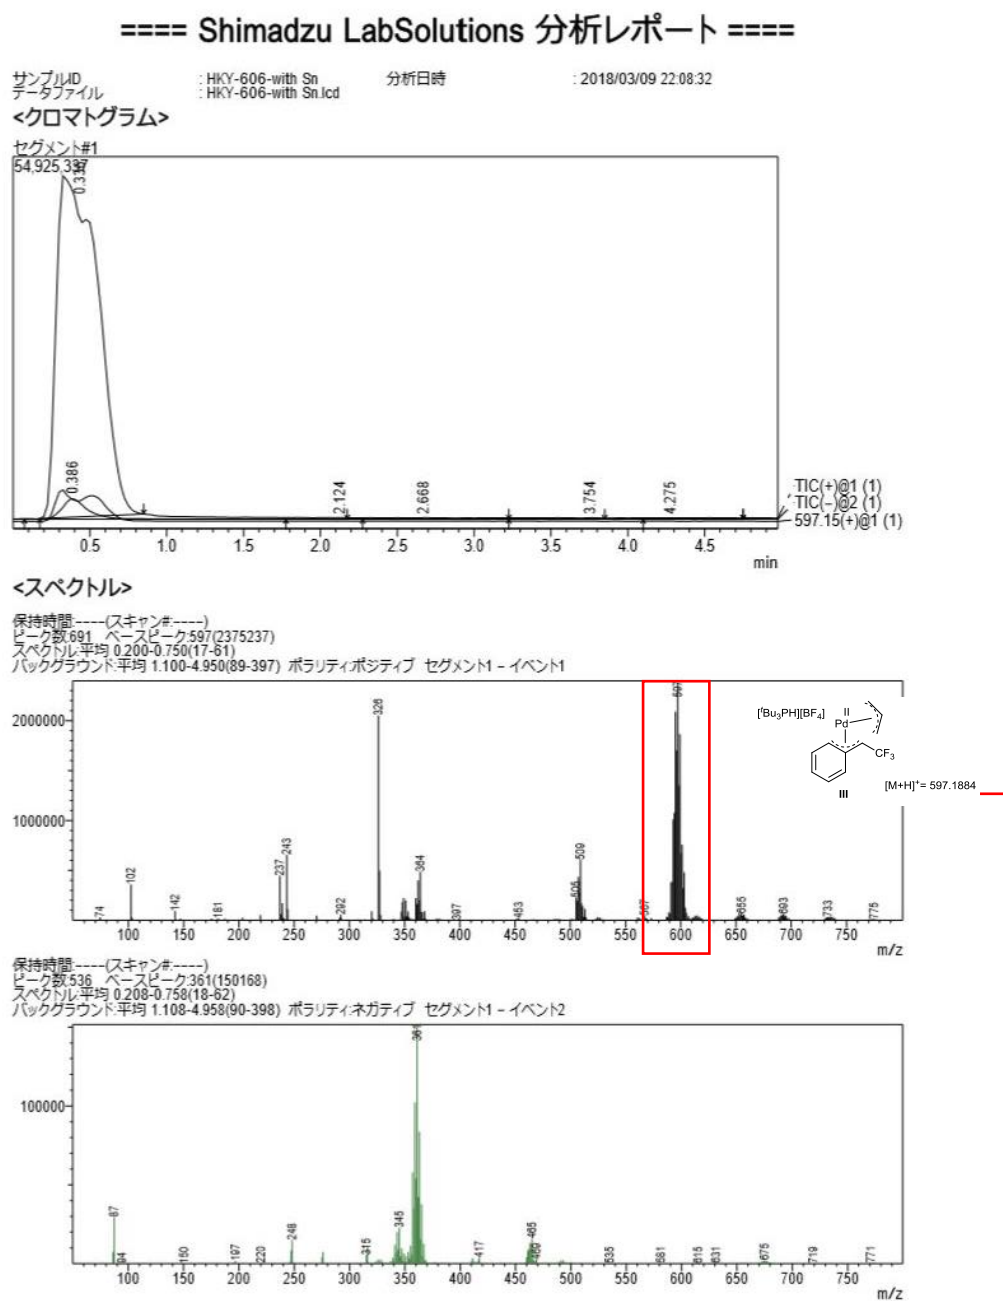

D:\Harada\HKY-606-with Sn.lcd

Figure S2. LC-MS spectra of Pd-intermediate III.



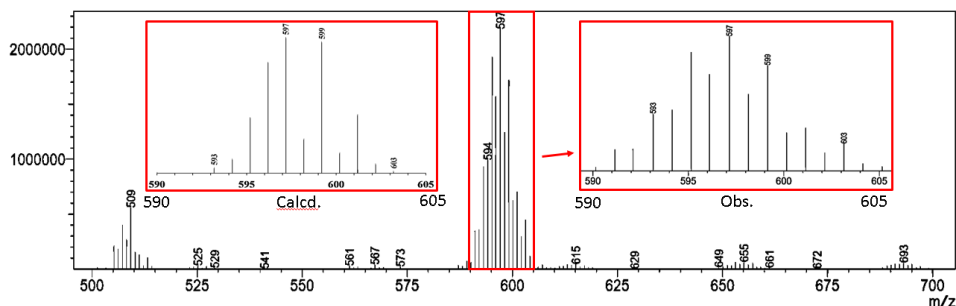

**Figure S2a** LC-MS spectra of III: Isotopic resolution of the calculated and observed LC-MS main peaks of the intermediate. Obs.:  $[M + H]^+ = 597.15$ , Calcd.:  $[M + H]^+ = 597.1884$ .

## 5. General experimental procedure for the synthesis of (1-chloro-2,2,2-trifluoroethyl)benzene substrates 1a–u & 4a–d

Followed by the general procedure from *J. Fluorine Chem.* 2005, **126**, 1174-1184. To a mixture of fluorinated alcohol (5.0 mmol) and pyridine (5.5 mmol) was slowly added thionyl chloride (5.5 mmol) and catalytic amount of DMF (0.1 mol %). The mixture was refluxed for 3–5 h and poured into cold water (5 mL). The organic layer was separated and the aqueous layer extracted with diethylether ( $3 \times 10$  mL). The combined organics extracts were washed with diluted HCl ( $4 \times 3$  mL), water ( $2 \times 5$  mL), saturated sodium bicarbonate ( $2 \times 5$  mL) and brine. Evaporation of the solvent yielded the crude product which was purified by column chromatography (by using 9:1 hexane/ethyl acetate as an eluents). All the starting materials was almost reported.<sup>1</sup>

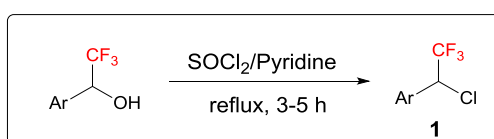

### Methyl 4-(1-chloro-2,2,2-trifluoroethyl)benzoate (**1f**)

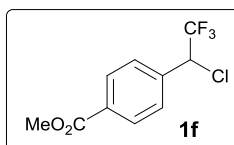

Following the general procedure, **1f** was obtained as a yellow oil (Yield: 82%). <sup>1</sup>H NMR (500 MHz, CDCl<sub>3</sub>)  $\delta$  8.09 (d,  $J = 8.2$  Hz, 2H), 7.59 (d,  $J = 8.1$  Hz, 2H), 5.17 (q,  $J = 6.7$  Hz, 1H), 3.94 (s, 3H). <sup>13</sup>C NMR (126 MHz, CDCl<sub>3</sub>)  $\delta$  166.32, 136.73, 131.96, 130.13, 128.99, 123.28 (q,  $J = 279.4$  Hz), 58.24 (q,  $J = 34.5$  Hz), 52.55. <sup>19</sup>F NMR (282 MHz, CDCl<sub>3</sub>)  $\delta$  -73.52 (d,  $J$

= 6.4 Hz, 3F). **HRMS (EI)** calculated for  $C_{10}H_8O_2F_3Cl$   $[M]^+$ : 252.0165, found: 252.0180.

### 3-(1-Chloro-2,2,2-trifluoroethyl)thiophene (**1r**)

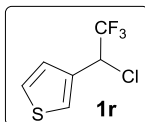

Following the general procedure, **1r** was obtained as a yellow oil (Yield: 38%).  **$^1H$  NMR** (500 MHz,  $CDCl_3$ )  $\delta$  7.50–7.46 (m, 1H), 7.40–7.36 (m, 1H), 7.21 (d,  $J$  = 5.0 Hz, 1H), 5.25 (q,  $J$  = 6.7 Hz, 1H).  **$^{13}C$  NMR** (126 MHz,  $CDCl_3$ )  $\delta$  132.65, 127.20, 126.99, 126.66, 123.30 (d,  $J$  = 278.9 Hz), 54.25 (q,  $J$  = 35.4 Hz).  **$^{19}F$  NMR** (282 MHz,  $CDCl_3$ )  $\delta$  –73.96 (d,  $J$  = 6.7 Hz, 3F). **HRMS (EI)** calculated for  $C_6H_4F_3SCl$   $[M]^+$ : 199.9674, found: 199.9699.

### 1-Chloro-4-(1-chloro-2,2,2-trifluoro-1-phenylethyl)benzene (**4b**)

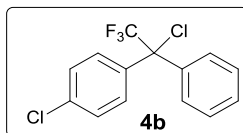

Following the general procedure, **4b** was obtained as a colorless oil (Yield: 90%).  **$^1H$  NMR** (500 MHz,  $CDCl_3$ )  $\delta$  7.50–7.30 (m, 9H).  **$^{13}C$  NMR** (126 MHz,  $CDCl_3$ )  $\delta$  137.77, 136.82, 135.43, 130.60, 129.36, 129.01, 128.49, 128.40, 124.33 (q,  $J$  = 283.2 Hz), 74.62 (q,  $J$  = 29.7 Hz).  **$^{19}F$  NMR** (282 MHz,  $CDCl_3$ )  $\delta$  –69.90 (s, 3F). **HRMS (EI)** calculated for  $C_{14}H_9F_3Cl_2$   $[M]^+$ : 304.0033, found: 304.0030.

### 1-(1-Chloro-2,2,2-trifluoro-1-phenylethyl)-4-(trifluoromethyl)benzene (**5c**)

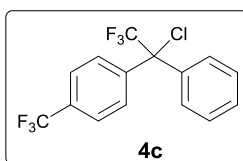

Following the general procedure, **5c** was obtained as a colorless oil (Yield: 74%).  **$^1H$  NMR** (500 MHz,  $CDCl_3$ )  $\delta$  7.65–7.61 (m, 4H), 7.46 (d,  $J$  = 7.4 Hz, 2H), 7.42–7.35 (m, 3H).  **$^{13}C$  NMR** (126 MHz,  $CDCl_3$ )  $\delta$  142.10, 137.45, 131.32 (q,  $J$  = 32.9 Hz), 129.69, 129.51, 129.00, 128.51, 125.31, 124.25 (q,  $J$  = 283.2 Hz), 123.80 (q,  $J$  = 272.3 Hz), 74.48 (d,  $J$  = 29.8 Hz).  **$^{19}F$  NMR** (282 MHz,  $CDCl_3$ )  $\delta$  –63.44 (s, 3F), –69.75 (s, 3F). **HRMS (EI)** calculated for  $C_{15}H_9F_6Cl$   $[M]^+$ : 338.0297, found: 338.0311.

## 6. General experimental procedure for the synthesis of trifluoromethyl substituted homoallyl compounds **3a–u** & **5a–d**

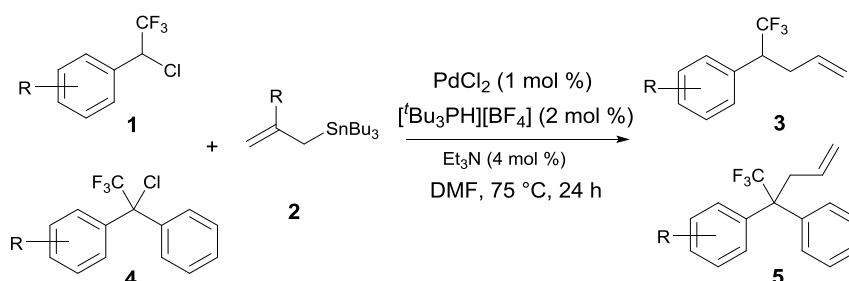

In a glove box, a flame dried test tube was charged with  $\text{PdCl}_2$  (0.01 equiv, 1 mol %), *tert*-butylphosphine tetrafluoroborate (0.02 equiv, 2 mol %), triethylamine (0.04 equiv, 4 mol %) and 1.25 mL DMF then stirred the mixture for 5 min at room temperature. After that added the (1-chloro-2,2,2-trifluoroethyl)benzene substrate **1** (0.5 mmol, 1 equiv) and allyltributylstannane (1.25 mmol, 2.5 equiv) respectively at room temperature. The reaction mixture was warmed up to 7 and stirred for 24 hours, upon completion of the reaction, excess of allyltributylstannane was quenched with TBAF (2 mL, 1 M solution in THF) followed by the water then aqueous layer was extracted with diethyl ether ( $3 \times 10$  mL) and combined the organic layers, dried over  $\text{Na}_2\text{SO}_4$  and concentrated on the reduced pressure, dried over sodium sulfate. The crude reaction mixture was purified by column chromatography (by using 9:1 hexane/ethyl acetate as an eluents) and all the products **3** are isolated as volatile liquids.

### (1,1,1-Trifluoropent-4-en-2-yl)benzene (**3a**)

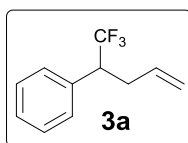

Followed by the general procedure, by using  $\text{PdCl}_2$  (1 mol %; 0.9 mg),  $[\text{tBu}_3\text{PH}][\text{BF}_4]$  (2 mol %; 2.9 mg) and  $\text{Et}_3\text{N}$  (4 mol %; 2.8  $\mu\text{L}$ ) in 1.25 mL DMF. To it **1a** (0.5 mmol, 97.3 mg, 1.0 equiv) and **2a** (1.25 mmol, 413.9 mg, 2.5 equiv) were added. After being stirred at 75 °C for 24 h, the mixture was quenched with TBAF (2 mL, 1 M solution in THF) then extracted with diethyl ether and dried *in vacuo*. The crude product was purified by flash column chromatography (using hexane as an eluent) to obtain the pure product **3a**.

Volatile colorless oil (32.0 mg, yield: 32%). **<sup>1</sup>H NMR** (500 MHz, CDCl<sub>3</sub>) δ 7.40–7.23 (m, 5H), 5.62–5.51 (m, 1H), 5.04 (d, *J*<sub>trans</sub> = 17.0 Hz, 1H), 4.97 (d, *J*<sub>cis</sub> = 10.1 Hz, 1H), 3.38–3.26 (m, 1H), 2.83–2.72 (m, 1H), 2.70–2.59 (m, 1H). **<sup>13</sup>C NMR** (126 MHz, CDCl<sub>3</sub>) δ 134.43, 134.03, 129.26, 128.75, 128.32, 126.84 (q, *J* = 280.0 Hz), 117.89, 50.20 (q, *J* = 26.3 Hz), 33.35. **<sup>19</sup>F NMR** (282 MHz, CDCl<sub>3</sub>) δ –70.21 (d, *J* = 9.2 Hz, 3F). **HRMS (EI)** calculated for C<sub>11</sub>H<sub>11</sub>F<sub>3</sub> [M]<sup>+</sup>: 200.0813, found: 200.0826.

### 1-Methoxy-4-(1,1,1-trifluoropent-4-en-2-yl)benzene (**3b**)

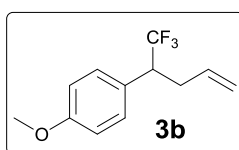

Followed by the general procedure, by using PdCl<sub>2</sub> (1 mol %; 0.9 mg), [tBu<sub>3</sub>PH][BF<sub>4</sub>] (2 mol %; 2.9 mg) and Et<sub>3</sub>N (4 mol %; 2.8 μL) in 1.25 mL DMF. To it **1b** (0.5 mmol, 112.3 mg, 1.0 equiv) and **2a** (1.25 mmol, 413.9 mg, 2.5 equiv) were added. After being stirred at 75 °C for 24 h, the mixture was quenched with TBAF (2 mL, 1 M solution in THF) then extracted with diethyl ether and dried *in vacuo*. The crude product was purified by flash column chromatography (using hexane as an eluent) to obtain the pure product **3b**. Volatile colorless oil (55.3 mg, yield: 48%). **<sup>1</sup>H NMR** (500 MHz, CDCl<sub>3</sub>) δ 7.20 (d, *J* = 8.4 Hz, 2H), 6.89 (d, *J* = 8.5 Hz, 2H), 5.63–5.51 (m, 1H), 5.04 (d, *J*<sub>trans</sub> = 17.1 Hz, 1H), 4.97 (d, *J*<sub>cis</sub> = 10.2 Hz, 1H), 3.81 (s, 3H), 3.33–3.21 (m, 1H), 2.80–2.70 (m, 1H), 2.66–2.55 (m, 1H). **<sup>13</sup>C NMR** (126 MHz, CDCl<sub>3</sub>) δ 159.50, 134.18, 130.30, 126.91 (q, *J* = 280.4 Hz), 126.32, 117.79, 114.12, 55.36, 49.33 (q, *J* = 26.3 Hz), 33.30. **<sup>19</sup>F NMR** (282 MHz, CDCl<sub>3</sub>) δ –70.67 (d, *J* = 9.2 Hz, 3F). **HRMS (EI)** calculated for C<sub>12</sub>H<sub>13</sub>F<sub>3</sub>O [M]<sup>+</sup>: 230.0918, found: 230.0931.

### 1-Methyl-4-(1,1,1-trifluoropent-4-en-2-yl)benzene (**3c**)

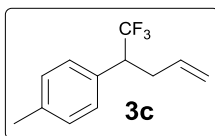

Followed by the general procedure, by using PdCl<sub>2</sub> (1 mol %; 0.9 mg), [tBu<sub>3</sub>PH][BF<sub>4</sub>] (2 mol %; 2.9 mg) and Et<sub>3</sub>N (4 mol %; 2.8 μL) in 1.25 mL DMF. To it **1c** (0.5 mmol, 104.3 mg, 1.0 equiv) and **2a** (1.25 mmol, 413.9 mg, 2.5 equiv) were added. After being stirred at 75 °C for 24 h, the mixture was quenched with TBAF (2 mL, 1 M solution in THF) then extracted with diethyl ether and dried *in vacuo*. The crude product was purified by flash column chromatography (using hexane as an eluent) to obtain the pure product **3c**.

Volatile colorless oil (61.1 mg, yield: 57%). **<sup>1</sup>H NMR** (500 MHz, CDCl<sub>3</sub>) δ 7.19–7.14 (m, 4H), 5.63–5.51 (m, 1H), 5.04 (d, *J*<sub>trans</sub> = 17.0 Hz, 1H), 4.96 (d, *J*<sub>cis</sub> = 10.1 Hz, 1H), 3.34–3.22 (m, 1H), 2.81–2.71 (m, 1H), 2.67–2.57 (m, 1H), 2.34 (s, 3H). **<sup>13</sup>C NMR** (126 MHz, CDCl<sub>3</sub>) δ 138.07, 134.17, 131.32, 129.47, 129.10, 126.90 (q, *J* = 280.3 Hz), 117.77, 49.77 (q, *J* = 26.3 Hz), 33.30, 21.25. **<sup>19</sup>F NMR** (282 MHz, CDCl<sub>3</sub>) δ –70.40 (d, *J* = 9.2 Hz, 3F). **HRMS (EI)** calculated for C<sub>12</sub>H<sub>13</sub>F<sub>3</sub> [M]<sup>+</sup>: 214.0969, found: 214.0983.

**(1,1,1-Trifluoro-4-methylpent-4-en-2-yl)benzene (3d)**

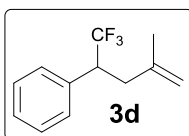

Followed by the general procedure, by using PdCl<sub>2</sub> (1 mol %; 0.9 mg), [<sup>t</sup>Bu<sub>3</sub>PH][BF<sub>4</sub>] (2 mol %; 2.9 mg) and Et<sub>3</sub>N (4 mol %; 2.8 μL) in 1.25 mL DMF. To it **1a** (0.5 mmol, 97.3 mg, 1.0 equiv) and **2b** (1.25 mmol, 431.4 mg, 2.5 equiv) were added. After being stirred at 75 °C for 24 h, the mixture was quenched with TBAF (2 mL, 1 M solution in THF) then extracted with diethyl ether and dried *in vacuo*. The crude product was purified by flash column chromatography (using hexane as an eluent) to obtain the pure product **3d**. Volatile colorless oil (72.8 mg, yield: 68%). **<sup>1</sup>H NMR** (500 MHz, CDCl<sub>3</sub>) δ 7.37–7.31 (m, 3H), 7.28 (d, *J* = 7.4 Hz, 2H), 4.69 (s, 1H), 4.60 (s, 1H), 3.54–3.40 (m, 1H), 2.73 (dd, *J* = 14.4, 3.9 Hz, 1H), 2.63 (dd, *J* = 14.3, 11.2 Hz, 1H), 1.63 (s, 3H). **<sup>13</sup>C NMR** (126 MHz, CDCl<sub>3</sub>) δ 140.77, 134.51, 129.25, 128.63, 128.25, 127.00 (q, *J* = 280.3 Hz), 113.98, 48.57 (q, *J* = 26.2 Hz), 36.94, 22.20. **<sup>19</sup>F NMR** (282 MHz, CDCl<sub>3</sub>) δ –70.29 (d, *J* = 9.2 Hz, 3F). **HRMS (EI)** calculated for C<sub>12</sub>H<sub>13</sub>F<sub>3</sub> [M]<sup>+</sup>: 214.0969, found: 214.0989.

**1-(*tert*-Butyl)-4-(1,1,1-trifluoropent-4-en-2-yl)benzene (3e)**

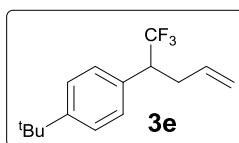

Followed by the general procedure, by using PdCl<sub>2</sub> (1 mol %; 0.9 mg), [<sup>t</sup>Bu<sub>3</sub>PH][BF<sub>4</sub>] (2 mol %; 2.9 mg) and Et<sub>3</sub>N (4 mol %; 2.8 μL) in 1.25 mL DMF. To it **1e** (0.5 mmol, 125.3 mg, 1.0 equiv) and **2a** (1.25 mmol, 413.9 mg, 2.5 equiv) were added. After being stirred at 75 °C for 24 h, the mixture was quenched with TBAF (2 mL, 1 M solution in THF) then extracted with diethyl ether and dried *in vacuo*. The crude product was purified by flash column chromatography (using hexane as an eluent) to obtain the pure product **3e**. Volatile colorless oil (85.9 mg, yield: 67%). **<sup>1</sup>H NMR** (500 MHz, CDCl<sub>3</sub>) δ 7.36 (d, *J* = 8.2

Hz, 2H), 7.20 (d,  $J = 8.0$  Hz, 2H), 5.66–5.53 (m, 1H), 5.06 (d,  $J_{trans} = 17.0$  Hz, 1H), 4.97 (d,  $J_{cis} = 10.1$  Hz, 1H), 3.36–3.23 (m, 1H), 2.81–2.71 (m, 1H), 2.69–2.58 (m, 1H), 1.31 (s, 9H).  **$^{13}\text{C}$  NMR** (126 MHz,  $\text{CDCl}_3$ )  $\delta$  151.14, 134.32, 131.31, 128.83, 126.95 (q,  $J = 280.1$  Hz), 125.64, 117.68, 49.70 (q,  $J = 26.3$  Hz), 34.65, 33.37, 31.43.  **$^{19}\text{F}$  NMR** (282 MHz,  $\text{CDCl}_3$ )  $\delta$  –70.24 (d,  $J = 9.2$  Hz, 3F). **HRMS (EI)** calculated for  $\text{C}_{15}\text{H}_{19}\text{F}_3$   $[\text{M}]^+$ : 256.1439, found: 256.1464.

#### Methyl 4-(1,1,1-trifluoropent-4-en-2-yl)benzoate (**3f**)

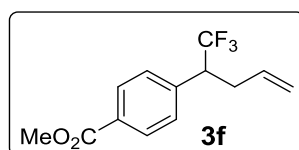

Followed by the general procedure, by using  $\text{PdCl}_2$  (1 mol %; 0.9 mg),  $[\text{tBu}_3\text{PH}][\text{BF}_4]$  (2 mol %; 2.9 mg) and  $\text{Et}_3\text{N}$  (4 mol %; 2.8  $\mu\text{L}$ ) in 1.25 mL DMF. To it **1f** (0.5 mmol, 126.3 mg, 1.0 equiv) and **2a** (1.25 mmol, 413.9 mg, 2.5 equiv) were added. After being stirred at 75 °C for 24 h, the mixture was quenched with TBAF (2 mL, 1 M solution in THF) then extracted with diethyl ether and dried *in vacuo*. The crude product was purified by flash column chromatography (using hexane as an eluent) to obtain the pure product **3f**. Volatile colorless oil (95.5 mg, yield: 74%).  **$^1\text{H}$  NMR** (500 MHz,  $\text{CDCl}_3$ )  $\delta$  8.03 (d,  $J = 8.1$  Hz, 2H), 7.37 (d,  $J = 8.0$  Hz, 2H), 5.59–5.48 (m, 1H), 5.02 (d,  $J_{trans} = 17.0$  Hz, 1H), 4.97 (d,  $J_{cis} = 10.2$  Hz, 1H), 3.92 (s, 3H), 3.46–3.35 (m, 1H), 2.85–2.76 (m, 1H), 2.70–2.59 (m, 1H).  **$^{13}\text{C}$  NMR** (126 MHz,  $\text{CDCl}_3$ )  $\delta$  166.80, 139.46, 133.40, 130.24, 130.01, 129.36, 126.48 (q,  $J = 280.2$  Hz), 118.40, 52.35, 50.17 (q,  $J = 26.6$  Hz), 33.28.  **$^{19}\text{F}$  NMR** (282 MHz,  $\text{CDCl}_3$ )  $\delta$  –69.91 (d,  $J = 9.0$  Hz, 3F). **GC-MS ( $m/z$ ):** 258  $[\text{M}]^+$ . Compound is already known. (*J. Am. Chem. Soc.* **2016**, *138*, 15869–15872)

#### 1-(*tert*-Butyl)-4-(1,1,1-trifluoro-4-methylpent-4-en-2-yl)benzene (**3g**)

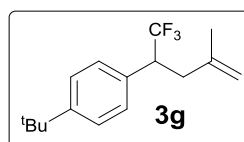

Followed by the general procedure, by using  $\text{PdCl}_2$  (1 mol %; 0.9 mg),  $[\text{tBu}_3\text{PH}][\text{BF}_4]$  (2 mol %; 2.9 mg) and  $\text{Et}_3\text{N}$  (4 mol %; 2.8  $\mu\text{L}$ ) in 1.25 mL DMF. To it **1e** (0.5 mmol, 125.3 mg, 1.0 equiv) and **2b** (1.25 mmol, 431.4 mg, 2.5 equiv) were added. After being stirred at 75 °C for 24 h, the mixture was quenched with TBAF (2 mL, 1 M solution in THF) then extracted with diethyl ether and dried *in vacuo*. The crude product was purified by flash

column chromatography (using hexane as an eluent) to obtain the pure product **3g**. Volatile colorless oil (102.7 mg, yield: 76%).  $^1\text{H NMR}$  (500 MHz,  $\text{CDCl}_3$ )  $\delta$  7.34 (d,  $J$  = 8.3 Hz, 2H), 7.19 (d,  $J$  = 8.1 Hz, 2H), 4.70 (s, 1H), 4.62 (s, 1H), 3.51–3.39 (m, 1H), 2.71 (dd,  $J$  = 14.5, 4.3 Hz, 1H), 2.60 (dd,  $J$  = 14.5, 10.8 Hz, 1H), 1.63 (s, 3H), 1.31 (s, 9H).  $^{13}\text{C NMR}$  (126 MHz,  $\text{CDCl}_3$ )  $\delta$  151.03, 141.00, 131.42, 128.80, 127.11 (q,  $J$  = 280.4 Hz), 125.52, 113.75, 48.03 (q,  $J$  = 26.2 Hz), 36.92, 34.63, 31.43, 22.29.  $^{19}\text{F NMR}$  (282 MHz,  $\text{CDCl}_3$ )  $\delta$  –70.29 (d,  $J$  = 9.3 Hz, 3F). **HRMS (EI)** calculated for  $\text{C}_{16}\text{H}_{21}\text{F}_3$   $[\text{M}]^+$ : 270.1595, found: 270.1620.

### 2-(1,1,1-Trifluoropent-4-en-2-yl)naphthalene (**3h**)

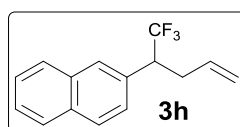

Followed by the general procedure, by using  $\text{PdCl}_2$  (1 mol %; 0.9 mg),  $[\text{tBu}_3\text{PH}][\text{BF}_4]$  (2 mol %; 2.9 mg) and  $\text{Et}_3\text{N}$  (4 mol %; 2.8  $\mu\text{L}$ ) in 1.25 mL DMF. To it **1h** (0.5 mmol, 122.3 mg, 1.0 equiv) and **2a** (1.25 mmol, 413.9 mg, 2.5 equiv) were added. After being stirred at 75 °C for 24 h, the mixture was quenched with TBAF (2 mL, 1 M solution in THF) then extracted with diethyl ether and dried *in vacuo*. The crude product was purified by flash column chromatography (using hexane as an eluent) to obtain the pure product **3h**. Volatile colorless oil (80.1 mg, yield: 64%).  $^1\text{H NMR}$  (500 MHz,  $\text{CDCl}_3$ )  $\delta$  7.88–7.80 (m, 3H), 7.74 (s, 1H), 7.54–7.46 (m, 2H), 7.42 (d,  $J$  = 8.4 Hz, 1H), 5.64–5.52 (m, 1H), 5.06 (d,  $J_{\text{trans}}$  = 17.0 Hz, 1H), 4.95 (d,  $J_{\text{cis}}$  = 10.1 Hz, 1H), 3.56–3.44 (m, 1H), 2.90–2.82 (m, 1H), 2.81–2.71 (m, 1H).  $^{13}\text{C NMR}$  (126 MHz,  $\text{CDCl}_3$ )  $\delta$  133.97, 133.33, 133.17, 131.84, 128.92, 128.54, 128.06, 127.80, 126.48, 126.46, 126.40, 124.68 (q,  $J$  = 280.4 Hz), 118.00, 50.36 (q,  $J$  = 26.4 Hz), 33.35.  $^{19}\text{F NMR}$  (282 MHz,  $\text{CDCl}_3$ )  $\delta$  –69.95 (d,  $J$  = 9.2 Hz, 3F). **HRMS (EI)** calculated for  $\text{C}_{15}\text{H}_{13}\text{F}_3$   $[\text{M}]^+$ : 250.0969, found: 250.0995.

### 1-(1,1,1-Trifluoropent-4-en-2-yl)naphthalene (**3i**)

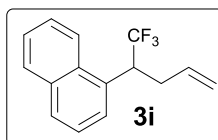

Followed by the general procedure, by using  $\text{PdCl}_2$  (1 mol %; 0.9 mg),  $[\text{tBu}_3\text{PH}][\text{BF}_4]$  (2 mol %; 2.9 mg) and  $\text{Et}_3\text{N}$  (4 mol %; 2.8  $\mu\text{L}$ ) in 1.25 mL DMF. To it **1i** (0.5 mmol, 122.3 mg, 1.0 equiv) and **2a** (1.25 mmol, 413.9 mg, 2.5 equiv) were added. After being stirred at 75 °C for 24 h, the mixture was quenched with TBAF (2 mL, 1 M solution in THF) then

extracted with diethyl ether and dried *in vacuo*. The crude product was purified by flash column chromatography (using hexane as an eluent) to obtain the pure product **3i**. Volatile colorless oil (56.3 mg, yield: 45%). **<sup>1</sup>H NMR** (500 MHz, CDCl<sub>3</sub>) δ 8.04 (d, *J* = 8.5 Hz, 1H), 7.89 (d, *J* = 8.1 Hz, 1H), 7.85 (d, *J* = 8.2 Hz, 1H), 7.64–7.47 (m, 4H), 5.64–5.51 (m, 1H), 5.05 (d, *J*<sub>trans</sub> = 17.0 Hz, 1H), 4.90 (d, *J*<sub>cis</sub> = 10.1 Hz, 1H), 4.44–4.27 (m, 1H), 3.02–2.91 (m, 1H), 2.90–2.77 (m, 1H). **<sup>13</sup>C NMR** (126 MHz, CDCl<sub>3</sub>) δ 134.02, 133.96, 132.76, 130.61, 129.26, 128.86, 127.11 (q, *J* = 280.6 Hz), 126.76, 125.84, 125.79, 125.41, 122.71, 117.91, 43.08 (q, *J* = 25.9 Hz), 33.98. **<sup>19</sup>F NMR** (282 MHz, CDCl<sub>3</sub>) δ –69.34 (d, *J* = 7.7 Hz, 3F). **HRMS (EI)** calculated for C<sub>15</sub>H<sub>13</sub>F<sub>3</sub> [M]<sup>+</sup>: 250.0969, found: 250.0996.

### 1-(Trifluoromethyl)-3-(1,1,1-trifluoropent-4-en-2-yl)benzene (**3j**)

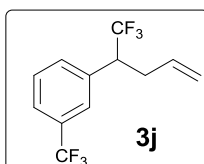

Followed by the general procedure, by using PdCl<sub>2</sub> (1 mol %; 0.9 mg), [<sup>t</sup>Bu<sub>3</sub>PH][BF<sub>4</sub>] (2 mol %; 2.9 mg) and Et<sub>3</sub>N (4 mol %; 2.8 μL) in 1.25 mL DMF. To it **1j** (0.5 mmol, 131.3 mg, 1.0 equiv) and **2a** (1.25 mmol, 413.9 mg, 2.5 equiv) were added. After being stirred at 75 °C for 24 h, the mixture was quenched with TBAF (2 mL, 1 M solution in THF) then extracted with diethyl ether and dried *in vacuo*. The crude product was purified by flash column chromatography (using hexane as an eluent) to obtain the pure product **3j**. Volatile colorless oil (91.2 mg, yield: 68%). **<sup>1</sup>H NMR** (500 MHz, CDCl<sub>3</sub>) δ 7.64–7.57 (m, 1H), 7.55–7.46 (m, 3H), 5.61–5.48 (m, 1H), 5.04 (d, *J*<sub>trans</sub> = 17.1 Hz, 1H), 5.00 (d, *J*<sub>cis</sub> = 10.1 Hz, 1H), 3.48–3.34 (m, 1H), 2.88–2.76 (m, 1H), 2.71–2.59 (m, 1H). **<sup>13</sup>C NMR** (126 MHz, CDCl<sub>3</sub>) δ 135.43, 133.26, 132.63, 131.23 (q, *J* = 32.3 Hz), 129.32, 126.41 (q, *J* = 286.4 Hz), 126.12, 125.33, 124.03 (q, *J* = 272.4 Hz), 118.60, 50.04 (q, *J* = 26.9 Hz), 33.20. **<sup>19</sup>F NMR** (282 MHz, CDCl<sub>3</sub>) δ –63.17 (s, 3F), –70.16 (d, *J* = 8.9 Hz, 3F). **HRMS (EI)** calculated for C<sub>12</sub>H<sub>10</sub>F<sub>6</sub> [M]<sup>+</sup>: 268.0687, found: 268.0711.

### 3-(1,1,1-Trifluoropent-4-en-2-yl)benzonitrile (**3k**)

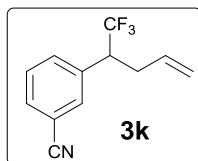

Followed by the general procedure, by using PdCl<sub>2</sub> (1 mol %; 0.9 mg), [<sup>t</sup>Bu<sub>3</sub>PH][BF<sub>4</sub>] (2 mol %; 2.9 mg) and Et<sub>3</sub>N (4 mol %; 2.8 μL) in 1.25 mL DMF. To it **1k** (0.5 mmol, 109.8 mg,



1.0 equiv) and **2a** (1.25 mmol, 413.9 mg, 2.5 equiv) were added. After being stirred at 75 °C for 24 h, the mixture was quenched with TBAF (2 mL, 1 M solution in THF) then extracted with diethyl ether and dried *in vacuo*. The crude product was purified by flash column chromatography (using hexane as an eluent) to obtain the pure product **3k**. Volatile colorless oil (79.9 mg, yield: 71%). **<sup>1</sup>H NMR** (500 MHz, CDCl<sub>3</sub>) δ 7.64 (d, *J* = 7.4 Hz, 1H), 7.58 (s, 1H), 7.56–7.46 (m, 2H), 5.58–5.47 (m, 1H), 5.07–4.98 (m, 2H), 3.45–3.33 (m, 1H), 2.87–2.78 (m, 1H), 2.67–2.56 (m, 1H). **<sup>13</sup>C NMR** (126 MHz, CDCl<sub>3</sub>) δ 135.99, 133.75, 132.87, 132.90, 132.11, 129.71, 126.23 (q, *J* = 280.5 Hz), 118.93, 118.53, 113.14, 49.83 (q, *J* = 27.0 Hz), 33.09. **<sup>19</sup>F NMR** (282 MHz, CDCl<sub>3</sub>) δ –70.14 (d, *J* = 8.9 Hz, 3F). **HRMS (EI)** calculated for C<sub>12</sub>H<sub>10</sub>F<sub>3</sub>N [M]<sup>+</sup>: 225.0765, found: 225.0745.

### 1-Fluoro-3-(1,1,1-trifluoropent-4-en-2-yl)benzene (**3l**)

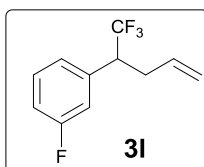

Followed by the general procedure, by using PdCl<sub>2</sub> (1 mol %; 0.9 mg), [tBu<sub>3</sub>PH][BF<sub>4</sub>] (2 mol %; 2.9 mg) and Et<sub>3</sub>N (4 mol %; 2.8 μL) in 1.25 mL DMF. To it **1l** (0.5 mmol, 106.3 mg, 1.0 equiv) and **2a** (1.25 mmol, 413.9 mg, 2.5 equiv) were added. After being stirred at 75 °C for 24 h, the mixture was quenched with TBAF (2 mL, 1 M solution in THF) then extracted with diethyl ether and dried *in vacuo*. The crude product was purified by flash column chromatography (using hexane as an eluent) to obtain the pure product **3l**. Volatile colorless oil (56.7 mg, yield: 52%). **<sup>1</sup>H NMR** (500 MHz, CDCl<sub>3</sub>) δ 7.37–7.28 (m, 1H), 7.10–6.98 (m, 3H), 5.62–5.49 (m, 1H), 5.04 (d, *J*<sub>trans</sub> = 17.0 Hz, 1H), 4.99 (d, *J*<sub>cis</sub> = 10.1 Hz, 1H), 3.39–3.27 (m, 1H), 2.82–2.73 (m, 1H), 2.65–2.55 (m, 1H). **<sup>13</sup>C NMR** (126 MHz, CDCl<sub>3</sub>) δ 162.94 (d, *J* = 246.5 Hz), 136.84, 133.52, 130.25 (d, *J* = 8.2 Hz), 126.52 (q, *J* = 280.3 Hz), 125.12 (d, *J* = 2.5 Hz), 118.29, 116.18 (d, *J* = 22.3 Hz), 115.38 (d, *J* = 21.2 Hz), 49.95 (q, *J* = 26.3 Hz), 33.33. **<sup>19</sup>F NMR** (282 MHz, CDCl<sub>3</sub>) δ –70.19 (d, *J* = 9.0 Hz, 3F), –113.04– –113.17 (m, 1F). **HRMS (EI)** calculated for C<sub>11</sub>H<sub>10</sub>F<sub>4</sub> [M]<sup>+</sup>: 218.0719, found: 218.0728.

### 5-(1,1,1-Trifluoropent-4-en-2-yl)benzo[d][1,3]dioxole (**3m**)

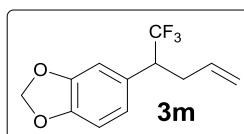

Followed by the general procedure, by using PdCl<sub>2</sub> (1 mol %; 0.9 mg), [tBu<sub>3</sub>PH][BF<sub>4</sub>] (2

mol %; 2.9 mg) and Et<sub>3</sub>N (4 mol %; 2.8  $\mu$ L) in 1.25 mL DMF. To it **1m** (0.5 mmol, 119.3 mg, 1.0 equiv) and **2a** (1.25 mmol, 413.9 mg, 2.5 equiv) were added. After being stirred at 75 °C for 24 h, the mixture was quenched with TBAF (2 mL, 1 M solution in THF) then extracted with diethyl ether and dried *in vacuo*. The crude product was purified by flash column chromatography (using hexane as an eluent) to obtain the pure product **3m**. Volatile colorless oil (61.1 mg, yield: 50%). **<sup>1</sup>H NMR** (500 MHz, CDCl<sub>3</sub>)  $\delta$  6.81–6.76 (m, 2H), 6.75–6.70 (m, 1H), 5.97 (s, 2H), 5.64–5.51 (m, 1H), 5.05 (d,  $J_{trans}$  = 17.0 Hz, 1H), 4.99 (d,  $J_{cis}$  = 10.1 Hz, 1H), 3.30–3.18 (m, 1H), 2.77–2.69 (m, 1H), 2.62–2.51 (m, 1H). **<sup>13</sup>C NMR** (126 MHz, CDCl<sub>3</sub>)  $\delta$  148.06, 147.60, 133.97, 127.94, 126.76 (q,  $J$  = 280.2 Hz), 123.08, 117.93, 109.09, 108.43, 101.37, 49.83 (q,  $J$  = 26.4 Hz), 33.40. **<sup>19</sup>F NMR** (282 MHz, CDCl<sub>3</sub>)  $\delta$  –70.60 (d,  $J$  = 9.1 Hz, 3F). **HRMS (EI)** calculated for C<sub>12</sub>H<sub>11</sub>F<sub>3</sub>O<sub>2</sub> [M]<sup>+</sup>: 244.0711, found: 244.0719.

#### 1-(Trifluoromethyl)-4-(1,1,1-trifluoropent-4-en-2-yl)benzene (3n)

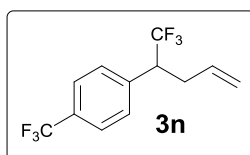

Followed by the general procedure, by using PdCl<sub>2</sub> (1 mol %; 0.9 mg), [tBu<sub>3</sub>PH][BF<sub>4</sub>] (2 mol %; 2.9 mg) and Et<sub>3</sub>N (4 mol %; 2.8  $\mu$ L) in 1.25 mL DMF. To it **1n** (0.5 mmol, 131.3 mg, 1.0 equiv) and **2a** (1.25 mmol, 413.9 mg, 2.5 equiv) were added. After being stirred at 75 °C for 24 h, the mixture was quenched with TBAF (2 mL, 1 M solution in THF) then extracted with diethyl ether and dried *in vacuo*. The crude product was purified by flash column chromatography (using hexane as an eluent) to obtain the pure product **3n**. Volatile colorless oil (81.8 mg, yield: 61%). **<sup>1</sup>H NMR** (500 MHz, CDCl<sub>3</sub>)  $\delta$  7.62 (d,  $J$  = 8.0 Hz, 2H), 7.41 (d,  $J$  = 7.9 Hz, 2H), 5.60–5.48 (m, 1H), 5.04 (d,  $J_{trans}$  = 17.0 Hz, 1H), 4.99 (d,  $J_{cis}$  = 10.1 Hz, 1H), 3.47–3.35 (m, 1H), 2.86–2.76 (m, 1H), 2.70–2.59 (m, 1H). **<sup>13</sup>C NMR** (126 MHz, CDCl<sub>3</sub>)  $\delta$  138.42, 133.26, 130.67 (q,  $J$  = 32.6 Hz), 129.72, 126.45 (q,  $J$  = 280.2 Hz), 125.76 (q,  $J$  = 3.8 Hz), 124.09 (q,  $J$  = 271.9 Hz), 118.55, 50.08 (q,  $J$  = 26.6 Hz), 33.25. **<sup>19</sup>F NMR** (282 MHz, CDCl<sub>3</sub>)  $\delta$  –63.21 (s, 3F), –70.03 (d,  $J$  = 9.0 Hz, 3F). **GC-MS (m/z)**: 268 [M]<sup>+</sup>. Compound is already known. (*J. Am. Chem. Soc.* **2016**, *138*, 15869–15872)

#### 4-(1,1,1-Trifluoropent-4-en-2-yl)benzonitrile (3o)

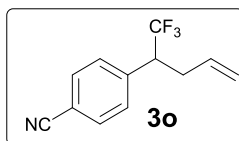

Followed by the general procedure, by using PdCl<sub>2</sub> (1 mol %; 0.9 mg), [tBu<sub>3</sub>PH][BF<sub>4</sub>] (2 mol %; 2.9 mg) and Et<sub>3</sub>N (4 mol %; 2.8 μL) in 1.25 mL DMF. To it **1o** (0.5 mmol, 109.8 mg, 1.0 equiv) and **2a** (1.25 mmol, 413.9 mg, 2.5 equiv) were added. After being stirred at 75 °C for 24 h, the mixture was quenched with TBAF (2 mL, 1 M solution in THF) then extracted with diethyl ether and dried *in vacuo*. The crude product was purified by flash column chromatography (using hexane as an eluent) to obtain the pure product **3o**. Volatile colorless oil (78.8 mg, yield: 70 %). <sup>1</sup>H NMR (500 MHz, CDCl<sub>3</sub>) δ 7.67 (d, *J* = 8.1 Hz, 2H), 7.41 (d, *J* = 8.0 Hz, 2H), 5.58–5.47 (m, 1H), 5.07–4.97 (m, 2H), 3.47–3.36 (m, 1H), 2.87–2.76 (m, 1H), 2.68–2.57 (m, 1H). <sup>13</sup>C NMR (126 MHz, CDCl<sub>3</sub>) δ 139.70, 132.90, 132.56, 130.11, 126.21 (q, *J* = 280.3 Hz), 118.84, 118.50, 112.50, 50.22 (q, *J* = 26.9 Hz), 33.14. <sup>19</sup>F NMR (282 MHz, CDCl<sub>3</sub>) δ –69.87 (d, *J* = 8.9 Hz, 3F). GC-MS (*m/z*): 225 [M]<sup>+</sup>. Compound is already known. (*J. Am. Chem. Soc.* **2016**, *138*, 15869–15872)

#### 1-Chloro-4-(1,1,1-trifluoropent-4-en-2-yl)benzene (**3p**)

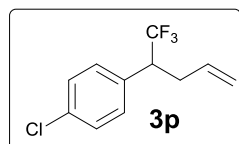

Followed by the general procedure, by using PdCl<sub>2</sub> (1 mol %; 0.9 mg), [tBu<sub>3</sub>PH][BF<sub>4</sub>] (2 mol %; 2.9 mg) and Et<sub>3</sub>N (4 mol %; 2.8 μL) in 1.25 mL DMF. To it **1p** (0.5 mmol, 114.5 mg, 1.0 equiv) and **2a** (1.25 mmol, 413.9 mg, 2.5 equiv) were added. After being stirred at 75 °C for 24 h, the mixture was quenched with TBAF (2 mL, 1 M solution in THF) then extracted with diethyl ether and dried *in vacuo*. The crude product was purified by flash column chromatography (using hexane as an eluent) to obtain the pure product **3p**. Volatile colorless oil (70.4 mg, yield: 60%). <sup>1</sup>H NMR (500 MHz, CDCl<sub>3</sub>) δ 7.34 (d, *J* = 8.3 Hz, 2H), 7.22 (d, *J* = 8.1 Hz, 2H), 5.60–5.48 (m, 1H), 5.03 (d, *J*<sub>trans</sub> = 17.0 Hz, 1H), 4.98 (d, *J*<sub>cis</sub> = 10.1 Hz, 1H), 3.37–3.25 (m, 1H), 2.83–2.72 (m, 1H), 2.66–2.53 (m, 1H). <sup>13</sup>C NMR (126 MHz, CDCl<sub>3</sub>) δ 134.32, 133.55, 132.85, 130.59, 129.01, 126.55 (q, *J* = 280.4 Hz), 118.30, 49.61 (q, *J* = 26.6 Hz), 33.22. <sup>19</sup>F NMR (282 MHz, CDCl<sub>3</sub>) δ –70.36 (d, *J* = 9.1 Hz, 3F). HRMS (ESI) calculated for C<sub>11</sub>H<sub>10</sub>ClF<sub>3</sub> [M + H]<sup>+</sup>: 235.0501, found:235.0512.

#### 1-Fluoro-4-(1,1,1-trifluoropent-4-en-2-yl)benzene (**3q**)

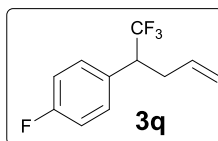

Followed by the general procedure, by using  $\text{PdCl}_2$  (1 mol %; 0.9 mg),  $[\text{tBu}_3\text{PH}][\text{BF}_4]$  (2 mol %; 2.9 mg) and  $\text{Et}_3\text{N}$  (4 mol %; 2.8  $\mu\text{L}$ ) in 1.25 mL DMF. To it **1q** (0.5 mmol, 106.3 mg, 1.0 equiv) and **2a** (1.25 mmol, 413.9 mg, 2.5 equiv) were added. After being stirred at 75 °C for 24 h, the mixture was quenched with TBAF (2 mL, 1 M solution in THF) then extracted with diethyl ether and dried *in vacuo*. The crude product was purified by flash column chromatography (using hexane as an eluent) to obtain the pure product **3q**. Volatile colorless oil (55.6 mg, yield: 51%).  **$^1\text{H}$  NMR** (500 MHz,  $\text{CDCl}_3$ )  $\delta$  7.29–7.22 (m, 2H), 7.05 (t,  $J = 8.5$  Hz, 2H), 5.61–5.49 (m, 1H), 5.03 (d,  $J_{\text{trans}} = 17.0$  Hz, 1H), 4.98 (d,  $J_{\text{cis}} = 10.1$  Hz, 1H), 3.38–3.26 (m, 1H), 2.83–2.72 (m, 1H), 2.65–2.54 (m, 1H).  **$^{13}\text{C}$  NMR** (126 MHz,  $\text{CDCl}_3$ )  $\delta$  162.69 (d,  $J = 247.0$  Hz), 133.71, 130.87 (d,  $J = 8.2$  Hz), 130.13, 126.66 (q,  $J = 279.7$  Hz), 118.17, 115.75 (d,  $J = 21.3$  Hz), 49.45 (q,  $J = 26.5$  Hz), 33.34.  **$^{19}\text{F}$  NMR** (282 MHz,  $\text{CDCl}_3$ )  $\delta$  –70.55 (d,  $J = 9.1$  Hz, 3F), –114.44– –114.57 (m, 1F). **HRMS (EI)** calculated for  $\text{C}_{11}\text{H}_{10}\text{F}_4$   $[\text{M}]^+$ : 218.0719, found: 218.0740.

### 3-(1,1,1-Trifluoropent-4-en-2-yl)thiophene (**3r**)

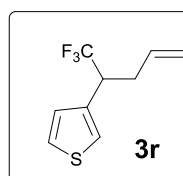

Followed by the general procedure, by using  $\text{PdCl}_2$  (1 mol %; 0.9 mg),  $[\text{tBu}_3\text{PH}][\text{BF}_4]$  (2 mol %; 2.9 mg) and  $\text{Et}_3\text{N}$  (4 mol %; 2.8  $\mu\text{L}$ ) in 1.25 mL DMF. To it **1r** (0.5 mmol, 100.3 mg, 1.0 equiv) and **2a** (1.25 mmol, 413.9 mg, 2.5 equiv) were added. After being stirred at 75 °C for 24 h, the mixture was quenched with TBAF (2 mL, 1 M solution in THF) then extracted with diethyl ether and dried *in vacuo*. The crude product was purified by flash column chromatography (using hexane as an eluent) to obtain the pure product **3r**. Volatile colorless oil (44.3 mg, yield: 43%).  **$^1\text{H}$  NMR** (500 MHz,  $\text{CDCl}_3$ )  $\delta$  7.35–7.30 (m, 1H), 7.19 (s, 1H), 7.04 (d,  $J = 4.4$  Hz, 1H), 5.66–5.54 (m, 1H), 5.05 (d,  $J_{\text{trans}} = 17.0$  Hz, 1H), 5.00 (d,  $J_{\text{cis}} = 10.1$  Hz, 1H), 3.56–3.42 (m, 1H), 2.78–2.68 (m, 1H), 2.63–2.52 (m, 1H).  **$^{13}\text{C}$  NMR** (126 MHz,  $\text{CDCl}_3$ )  $\delta$  134.78, 133.98, 127.55, 126.49 (q,  $J = 279.9$  Hz), 126.11, 124.36, 117.93, 45.57 (q,  $J = 27.2$  Hz), 33.65.  **$^{19}\text{F}$  NMR** (282 MHz,  $\text{CDCl}_3$ )  $\delta$  –70.75 (d,  $J = 9.0$  Hz, 3F). **HRMS (EI)** calculated for  $\text{C}_9\text{H}_9\text{F}_3\text{S}$   $[\text{M}]^+$ : 206.0377, found: 206.0391.

#### 4-(1,1,1-Trifluoro-4-methylpent-4-en-2-yl)benzonitrile (**3s**)

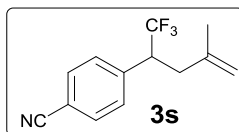

Followed by the general procedure, by using PdCl<sub>2</sub> (1 mol %; 0.9 mg), [tBu<sub>3</sub>PH][BF<sub>4</sub>] (2 mol %; 2.9 mg) and Et<sub>3</sub>N (4 mol %; 2.8 μL) in 1.25 mL DMF. To it **1o** (0.5 mmol, 109.8 mg, 1.0 equiv) and **2b** (1.25 mmol, 431.4 mg, 2.5 equiv) were added. After being stirred at 75 °C for 24 h, the mixture was quenched with TBAF (2 mL, 1 M solution in THF) then extracted with diethyl ether and dried *in vacuo*. The crude product was purified by flash column chromatography (using hexane as an eluent) to obtain the pure product **3s**. Volatile colorless oil (90.9 mg, yield: 76%). <sup>1</sup>H NMR (500 MHz, CDCl<sub>3</sub>) δ 7.65 (d, *J* = 8.1 Hz, 2H), 7.41 (d, *J* = 8.0 Hz, 2H), 4.70 (s, 1H), 4.56 (s, 1H), 3.62–3.49 (m, 1H), 2.76 (dd, *J* = 14.5, 3.4 Hz, 1H), 2.61 (dd, *J* = 14.4, 11.5 Hz, 1H), 1.63 (s, 3H). <sup>13</sup>C NMR (126 MHz, CDCl<sub>3</sub>) δ 139.75, 132.47, 130.08, 126.37 (q, *J* = 280.2 Hz), 118.54, 114.72, 112.43, 48.56 (q, *J* = 26.7 Hz), 36.73, 22.08. <sup>19</sup>F NMR (282 MHz, CDCl<sub>3</sub>) δ –69.96 (d, *J* = 8.9 Hz, 3F). GC-MS (*m/z*): 239 [M]<sup>+</sup>. Compound is already known. (*J. Am. Chem. Soc.* **2016**, *138*, 15869–15872)

#### 1-Chloro-4-(1,1,1-trifluoro-4-methylpent-4-en-2-yl)benzene (**3t**)

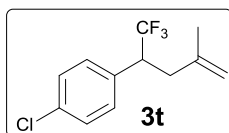

Followed by the general procedure, by using PdCl<sub>2</sub> (1 mol %; 0.9 mg), [tBu<sub>3</sub>PH][BF<sub>4</sub>] (2 mol %; 2.9 mg) and Et<sub>3</sub>N (4 mol %; 2.8 μL) in 1.25 mL DMF. To it **1p** (0.5 mmol, 114.5 mg, 1.0 equiv) and **2b** (1.25 mmol, 431.4 mg, 2.5 equiv) were added. After being stirred at 75 °C for 24 h, the mixture was quenched with TBAF (2 mL, 1 M solution in THF) then extracted with diethyl ether and dried *in vacuo*. The crude product was purified by flash column chromatography (using hexane as an eluent) to obtain the pure product **3t**. Volatile colorless oil (87.0 mg, yield: 70%). <sup>1</sup>H NMR (500 MHz, CDCl<sub>3</sub>) δ 7.32 (d, *J* = 8.5 Hz, 2H), 7.21 (d, *J* = 8.3 Hz, 2H), 4.70 (s, 1H), 4.58 (s, 1H), 3.51–3.40 (m, 1H), 2.72 (dd, *J* = 14.5, 3.7 Hz, 1H), 2.58 (dd, *J* = 14.4, 11.4 Hz, 1H), 1.62 (s, 3H). <sup>13</sup>C NMR (126 MHz, CDCl<sub>3</sub>) δ 140.32, 134.24, 132.91, 130.58, 128.90, 126.72 (q, *J* = 279.9 Hz), 114.32, 47.96 (q, *J* = 26.5 Hz), 36.81, 22.13. <sup>19</sup>F NMR (282 MHz, CDCl<sub>3</sub>) δ –70.44 (d, *J* = 9.1 Hz, 3F). HRMS (EI) calculated for C<sub>12</sub>H<sub>12</sub>ClF<sub>3</sub> [M]<sup>+</sup>: 248.0580, found: 248.0599.

#### 3-(1,1,1-Trifluoro-4-methylpent-4-en-2-yl)thiophene (**3u**)

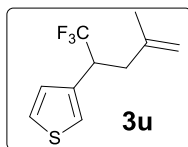

Followed by the general procedure, by using PdCl<sub>2</sub> (1 mol %; 0.9 mg), [tBu<sub>3</sub>PH][BF<sub>4</sub>] (2 mol %; 2.9 mg) and Et<sub>3</sub>N (4 mol %; 2.8 μL) in 1.25 mL DMF. To it **1r** (0.5 mmol, 100.3 mg, 1.0 equiv) and **2b** (1.25 mmol, 431.4 mg, 2.5 equiv) were added. After being stirred at 75 °C for 24 h, the mixture was quenched with TBAF (2 mL, 1 M solution in THF) then extracted with diethyl ether and dried *in vacuo*. The crude product was purified by flash column chromatography (using hexane as an eluent) to obtain the pure product **3u**. Volatile colorless oil (58.4 mg, yield: 53%). **<sup>1</sup>H NMR** (500 MHz, CDCl<sub>3</sub>) δ 7.32–7.28 (m, 1H), 7.18 (d-like, *J* = 1.9 Hz, 1H), 7.04 (d, *J* = 4.9 Hz, 1H), 4.72 (s, 1H), 4.62 (s, 1H), 3.69–3.57 (m, 1H), 2.69 (dd, *J* = 14.3, 3.8 Hz, 1H), 2.54 (dd, *J* = 14.2, 11.1 Hz, 1H), 1.64 (s, 3H). **<sup>13</sup>C NMR** (126 MHz, CDCl<sub>3</sub>) δ 140.83, 134.88, 127.55, 126.64 (q, *J* = 279.9 Hz), 125.86, 124.30, 113.83, 44.04 (q, *J* = 27.1 Hz), 37.36, 22.15. **<sup>19</sup>F NMR** (282 MHz, CDCl<sub>3</sub>) δ –70.86 (d, *J* = 9.1 Hz, 3F). **HRMS (EI)** calculated for C<sub>10</sub>H<sub>11</sub>F<sub>3</sub>S [M]<sup>+</sup>: 220.0534, found: 220.0526.

#### (1,1,1-Trifluoropent-4-ene-2,2-diyl)dibenzene (**5a**)

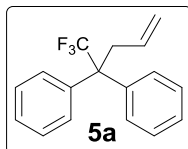

Followed by the general procedure, by using PdCl<sub>2</sub> (1 mol %; 0.9 mg), [tBu<sub>3</sub>PH][BF<sub>4</sub>] (2 mol %; 2.9 mg) and Et<sub>3</sub>N (4 mol %; 2.8 μL) in 1.25 mL DMF. To it **4a** (0.5 mmol, 135.3 mg, 1.0 equiv) and **2a** (1.25 mmol, 413.9 mg, 2.5 equiv) were added. After being stirred at 75 °C for 24 h, the mixture was quenched with TBAF (2 mL, 1 M solution in THF) then extracted with diethyl ether and dried *in vacuo*. The crude product was purified by flash column chromatography (using hexane as an eluent) to obtain the pure product **5a**. Volatile colorless oil (89.8 mg, yield: 65%). **<sup>1</sup>H NMR** (500 MHz, CDCl<sub>3</sub>) δ 7.34–7.26 (m, 10H), 5.62–5.50 (m, 1H), 5.02 (d, *J*<sub>trans</sub> = 17.0 Hz, 1H), 4.94 (d, *J*<sub>cis</sub> = 10.2 Hz, 1H), 3.21 (d, *J* = 6.9 Hz, 2H). **<sup>13</sup>C NMR** (126 MHz, CDCl<sub>3</sub>) δ 140.02, 133.20, 129.47, 128.09, 127.63 (q, *J* = 285.3 Hz), 127.55, 118.47, 57.69 (q, *J* = 23.3 Hz), 40.82. **<sup>19</sup>F NMR** (282 MHz, CDCl<sub>3</sub>) δ –66.49 (s, 3F). **HRMS (EI)** calculated for C<sub>17</sub>H<sub>15</sub>F<sub>3</sub> [M]<sup>+</sup>: 276.1126, found: 276.1130.

#### 1-Chloro-4-(1,1,1-trifluoro-2-phenylpent-4-en-2-yl)benzene (**5b**)

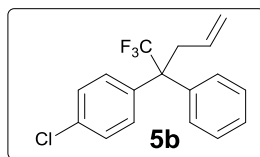

Followed by the general procedure, by using PdCl<sub>2</sub> (1 mol %; 0.9 mg), [tBu<sub>3</sub>PH][BF<sub>4</sub>] (2 mol %; 2.9 mg) and Et<sub>3</sub>N (4 mol %; 2.8 μL) in 1.25 mL DMF. To it **4b** (0.5 mmol, 152.6 mg, 1.0 equiv) and **2a** (1.25 mmol, 413.9 mg, 2.5 equiv) were added. After being stirred at 75 °C for 24 h, the mixture was quenched with TBAF (2 mL, 1 M solution in THF) then extracted with diethyl ether and dried *in vacuo*. The crude product was purified by flash column chromatography (using hexane as an eluent) to obtain the pure product **5b**. Volatile colorless oil (77.7 mg, yield: 50%). <sup>1</sup>H NMR (500 MHz, CDCl<sub>3</sub>) δ 7.33–7.19 (m, 9H), 5.59–5.49 (m, 1H), 5.01 (d, *J*<sub>trans</sub> = 17.0 Hz, 1H), 4.96 (d, *J*<sub>cis</sub> = 10.2 Hz, 1H), 3.18 (d, *J* = 6.9 Hz, 2H). <sup>13</sup>C NMR (126 MHz, CDCl<sub>3</sub>) δ 139.45, 138.54, 133.63, 132.72, 130.92, 129.37, 128.28, 128.24, 127.79, 127.41 (q, *J* = 285.2 Hz), 118.94, 57.40 (q, *J* = 23.2 Hz), 40.71. <sup>19</sup>F NMR (282 MHz, CDCl<sub>3</sub>) δ –66.76 (s, 3F). HRMS (EI) calculated for C<sub>17</sub>H<sub>14</sub>F<sub>3</sub>Cl [M]<sup>+</sup>: 310.0736, found: 310.0753.

#### 1-(1,1,1-Trifluoro-2-phenylpent-4-en-2-yl)-4-(trifluoromethyl)benzene (**5c**)

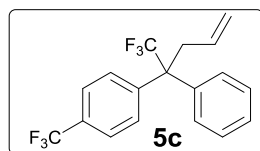

Followed by the general procedure, by using PdCl<sub>2</sub> (1 mol %; 0.9 mg), [tBu<sub>3</sub>PH][BF<sub>4</sub>] (2 mol %; 2.9 mg) and Et<sub>3</sub>N (4 mol %; 2.8 μL) in 1.25 mL DMF. To it **4c** (0.5 mmol, 169.3 mg, 1.0 equiv) and **2a** (1.25 mmol, 413.9 mg, 2.5 equiv) were added. After being stirred at 75 °C for 24 h, the mixture was quenched with TBAF (2 mL, 1 M solution in THF) then extracted with diethyl ether and dried *in vacuo*. The crude product was purified by flash column chromatography (using hexane as an eluent) to obtain the pure product **5c**. Volatile colorless oil (106.7 mg, yield: 62%). <sup>1</sup>H NMR (500 MHz, CDCl<sub>3</sub>) δ 7.58 (d, *J* = 8.3 Hz, 2H), 7.41 (d, *J* = 8.2 Hz, 2H), 7.36–7.30 (m, 3H), 7.28–7.22 (m, 2H), 5.60–5.49 (m, 1H), 5.02 (d, *J*<sub>trans</sub> = 17.0, 1H), 4.97 (d, *J*<sub>cis</sub> = 10.2 Hz, 1H), 3.22 (d, *J* = 6.9 Hz, 2H). <sup>13</sup>C NMR (126 MHz, CDCl<sub>3</sub>) δ 144.05, 139.15, 132.44, 129.92, 129.42, 128.34, 127.97, 127.31 (q, *J* = 285.3 Hz), 125.04 (q, *J* = 3.6 Hz), 124.09 (q, *J* = 272.2 Hz), 119.16, 57.81 (q, *J* = 23.4 Hz), 40.68. One carbon of (CF<sub>3</sub>-C(Ar)) is not observed. <sup>19</sup>F NMR (282 MHz, CDCl<sub>3</sub>) δ –63.21 (s, 3F), –66.61 (s, 3F). HRMS (EI) calculated for C<sub>18</sub>H<sub>14</sub>F<sub>6</sub> [M]<sup>+</sup>: 344.1000, found: 344.0993.

### 1-Methoxy-4-(1,1,1-trifluoro-2-phenylpent-4-en-2-yl)benzene (**5d**)

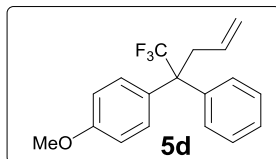

Followed by the general procedure, by using PdCl<sub>2</sub> (1 mol %; 0.9 mg), [tBu<sub>3</sub>PH][BF<sub>4</sub>] (2 mol %; 2.9 mg) and Et<sub>3</sub>N (4 mol %; 2.8 μL) in 1.25 mL DMF. To it **4d** (0.5 mmol, 150.4 mg, 1.0 equiv) and **2a** (1.25 mmol, 413.9 mg, 2.5 equiv) were added. After being stirred at 75 °C for 24 h, the mixture was quenched with TBAF (2 mL, 1 M solution in THF) then extracted with diethyl ether and dried *in vacuo*. The crude product was purified by flash column chromatography (using hexane as an eluent) to obtain the pure product **5d**. Volatile colorless oil (91.9mg, yield: 60%). **<sup>1</sup>H NMR** (500 MHz, CDCl<sub>3</sub>) δ 7.34–7.25 (m, 5H), 7.19 (d, *J* = 8.6 Hz, 2H), 6.84 (d, *J* = 8.8 Hz, 2H), 5.62–5.51 (m, 1H), 5.02 (d, *J*<sub>trans</sub> = 17.0 Hz, 1H), 4.94 (d, *J*<sub>cis</sub> = 10.2 Hz, 1H), 3.81 (s, 3H), 3.18 (d, *J* = 6.8 Hz, 2H). **<sup>13</sup>C NMR** (126 MHz, CDCl<sub>3</sub>) δ 158.77, 140.15, 133.30, 131.95, 130.68, 129.36, 128.08, 127.72 (q, *J* = 285.2 Hz), 127.45, 118.39, 113.36, 57.09 (q, *J* = 23.0 Hz), 55.34, 40.86. **<sup>19</sup>F NMR** (282 MHz, CDCl<sub>3</sub>) δ –66.77 (s, 3F). **HRMS (EI)** calculated for C<sub>18</sub>H<sub>17</sub>OF<sub>3</sub> [M]<sup>+</sup>: 306.1232, found: 306.1239.

### (*E*)-(3-(Trifluoromethyl)hexa-1,5-dien-1-yl)benzene (**7a**)

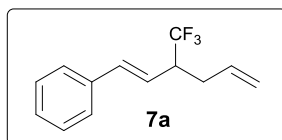

Followed by the general procedure, by using PdCl<sub>2</sub> (1 mol %; 0.9 mg), [tBu<sub>3</sub>PH][BF<sub>4</sub>] (2 mol %; 2.9 mg) and Et<sub>3</sub>N (4 mol %; 2.8 μL) in 1.25 mL DMF. To it mixture of **6a** and **6b** (0.5 mmol, 110.3 mg, 1.0 equiv) and **2a** (1.25 mmol, 413.9 mg, 2.5 equiv) were added. After being stirred at 75°C for 24 h, the mixture was quenched with TBAF (2 mL, 1 M solution in THF) then extracted with diethyl ether and dried *in vacuo*. The crude product was purified by flash column chromatography (using hexane as an eluent) to obtain the pure product **7a**. Volatile colorless oil (80.3 mg, yield: 71%). **<sup>1</sup>H NMR** (500 MHz, CDCl<sub>3</sub>) δ 7.39 (d, *J* = 7.9 Hz, 2H), 7.33 (t, *J* = 7.5 Hz, 2H), 7.29–7.26 (m, 1H), 6.56 (d, *J* = 15.9 Hz, 1H), 5.98 (dd, *J* = 15.9, 9.1 Hz, 1H), 5.80–5.69 (m, 1H), 5.13 (d, *J*<sub>trans</sub> = 17.0 Hz, 1H), 5.08 (d, *J*<sub>cis</sub> = 10.1 Hz, 1H), 3.00–2.88 (m, 1H), 2.63–2.55 (m, 1H), 2.41–2.31 (m, 1H). **<sup>13</sup>C NMR** (126 MHz, CDCl<sub>3</sub>) δ 136.33, 136.07, 134.00, 128.77, 128.22, 126.84 (q, *J* = 280.1 Hz), 126.64, 122.40, 118.00, 47.85 (q, *J* = 26.5 Hz), 32.84. **<sup>19</sup>F NMR** (282 MHz, CDCl<sub>3</sub>) δ –71.18 (d, *J* = 8.8 Hz, 3F). **HRMS (EI)** calculated for C<sub>13</sub>H<sub>13</sub>F<sub>3</sub> [M]<sup>+</sup>: 226.0969, found: 226.0974.



## 7. Applications

### a) General procedure for the synthesis of methyl 4-(1,1,1-trifluoro-3-(oxiran-2-yl)propan-2-yl)benzoate (**8a**)

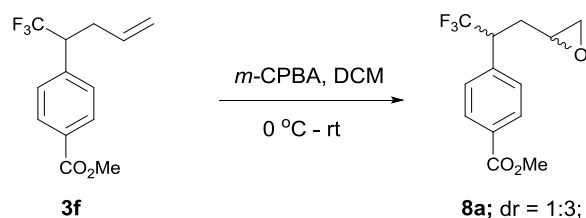

A flame dried test tube was charged with *m*-CPBA (0.3 mmol, 51.77 mg, 70% wt/wt in water) and dry DCM (3 mL) then cooled to 0 °C. Next added the compound **3f** (0.2 mmol, 51.6 mg) and increase the temperature gradually to room temperature and stirred for 24 h. After completion of reaction, mixture was quenched with saturated NaHCO<sub>3</sub> (3 mL). The organic layer was separated and the aqueous layer was extracted with additional DCM (2 × 10 mL). The organic layers were combined and washed with brine (10 mL). The organic layer was separated, dried over Na<sub>2</sub>SO<sub>4</sub>, and concentrated over rotary evaporator. The dr was calculated from the crude reaction mixture by using the <sup>19</sup>F NMR. The crude product was purified by silica gel column chromatography (by using 9:1 hexane/ethyl acetate as eluents) to obtain pure epoxide **8a**. Yield 70%, white solid, mp 64–65 °C, dr = 1:3, <sup>1</sup>H NMR (500 MHz, CDCl<sub>3</sub>) δ 8.07 (d, *J* = 8.1 Hz, 2H), 7.45 (d, *J* = 8.1 Hz, 2H), 3.93 (s, 3H), 3.69–3.57 (m, 1H), 2.72–2.62 (m, 2H), 2.48–2.44 (m, 1H), 2.33–2.24 (m, 1H), 2.04–1.96 (m, 1H). <sup>13</sup>C NMR (126 MHz, CDCl<sub>3</sub>) δ 166.68, 138.97, 130.59, 130.26, 129.29, 126.37 (q, *J* = 279.8 Hz), 52.42, 49.25, 48.01, 47.81 (q, *J* = 27.7 Hz), 32.64. <sup>19</sup>F NMR (282 MHz, CDCl<sub>3</sub>) δ –70.18 (d, *J* = 9.1 Hz, 3F). HRMS (ESI) calculated for C<sub>13</sub>H<sub>14</sub>O<sub>3</sub>F<sub>3</sub> [M + H]<sup>+</sup>: 275.0895, found: 275.0901.

### b) General procedure for the synthesis of methyl (*E*)-4-(1,1,1-trifluoro-5-phenylpent-4-en-2-yl)benzoate (**8b**)

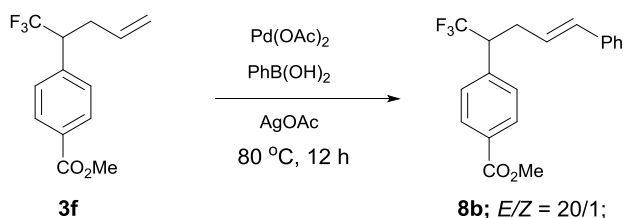

In a flame dried test tube compound **3f** (0.2 mmol, 51.6 mg, 1 equiv) was dissolved in 2 mL DMF then test tube was charged with Pd(OAc)<sub>2</sub> (0.01 mmol, 2.24 mg, 5 mol %), phenylboronic acid (0.22 mmol, 26.82 mg, 1.1 equiv) and AgOAc (0.3 mmol, 50.07 mg,

1.5 equiv). Next, the reaction mixture was stirred at 80 °C for 12 h. After completion of starting material, reaction mixture was quenched with water then extracted with ether (2 × 10 mL), dried over Na<sub>2</sub>SO<sub>4</sub> and concentrated on reduced pressure. The crude product was purified by column chromatography (by using 9:1 hexane/ethyl acetate as eluents) to obtain pure product **8b**. Yield 75%, *E/Z* = 20/1, colorless oil. <sup>1</sup>H NMR (500 MHz, CDCl<sub>3</sub>) δ 8.04 (d, *J* = 8.3 Hz, 2H), 7.40 (d, *J* = 8.2 Hz, 2H), 7.27–7.15 (m, 5H), 6.38 (d, *J* = 15.8 Hz, 1H), 5.93–5.85 (m, 1H), 3.91 (s, 3H), 3.52–3.42 (m, 1H), 2.99–2.91 (m, 1H), 2.84–2.75 (m, 1H). <sup>13</sup>C NMR (126 MHz, CDCl<sub>3</sub>) δ 166.76, 139.46, 136.86, 133.40, 130.29, 130.08, 129.31, 128.64, 127.63, 126.48 (d, *J* = 280.4 Hz), 126.23, 124.81, 50.55 (q, *J* = 26.5 Hz), 52.32, 32.66. <sup>19</sup>F NMR (282 MHz, CDCl<sub>3</sub>) δ –69.73 (d, *J* = 9.0 Hz, 3F). HRMS (ESI) calculated for C<sub>19</sub>H<sub>17</sub>O<sub>2</sub>F<sub>3</sub> [M]<sup>+</sup>: 334.1181, found: 334.1204.

**c) General procedure for the synthesis of methyl (*E*)-4-(5-acetoxy-1,1,1-trifluoropent-4-en-2-yl)benzoate (**8c**)**

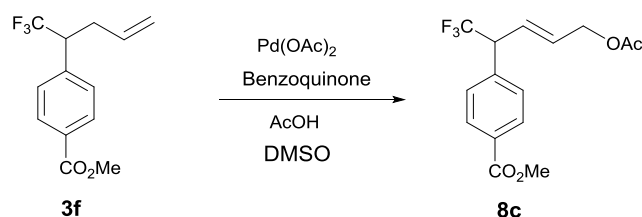

To a flame dried test tube was charged with Pd(OAc)<sub>2</sub> (0.02 mmol, 4.5 mg, 10 mol %), benzoquinone (0.4 mmol, 43.2 mg, 2 equiv), and 4Å MS (21.7 mg). To the solids test tube was sequentially added the following: DMSO (0.3 mL), compound **3f** (0.2 mmol, 51.6 mg, 1 equiv), AcOH (0.3 mL). The vial was charged with a stir bar, capped and allowed to heat at 40 °C for 72 h. After that, the reaction was quenched with saturated NH<sub>4</sub>Cl (1 mL) and extracted with CH<sub>2</sub>Cl<sub>2</sub> (3 × 10 mL). The combined organic layers were washed with H<sub>2</sub>O (2 × 10 mL), dried over Na<sub>2</sub>SO<sub>4</sub>, filtered and concentrated *in vacuo*. The crude reaction mixture was purified column chromatography (by using 9:1 hexane/ethyl acetate as eluents) to obtain pure product **8c**. Yield 40%, oil. <sup>1</sup>H NMR (500 MHz, CDCl<sub>3</sub>) δ 8.05 (d, *J* = 8.2 Hz, 2H), 7.40 (d, *J* = 8.0 Hz, 2H), 6.05 (dd, *J* = 15.5, 7.8 Hz, 1H), 5.80 (dt, *J* = 15.5, 5.7 Hz, 1H), 4.59 (d, *J* = 5.7 Hz, 2H), 4.08 (p, *J* = 8.8 Hz, 1H), 3.93 (s, 3H), 2.07 (s, 3H). <sup>13</sup>C NMR (126 MHz, CDCl<sub>3</sub>) δ 170.72, 166.68, 139.09, 131.15, 130.37, 130.22, 129.21, 126.61, 125.59 (q, *J* = 280.4 Hz), 63.91, 52.87 (q, *J* = 28.1 Hz), 52.40, 21.00. <sup>19</sup>F NMR (282 MHz, CDCl<sub>3</sub>) δ –69.28 (d, *J* = 9.1 Hz, 3F). HRMS (EI) calculated for C<sub>15</sub>H<sub>15</sub>O<sub>4</sub>F<sub>3</sub>Na [M + Na]<sup>+</sup>: 339.0820, found: 339.0820.

**d) General procedure for the synthesis of methyl 4-(5-bromo-1,1,1-trifluoro-4-**

### hydroxypentan-2-yl)benzoate (**8d**)

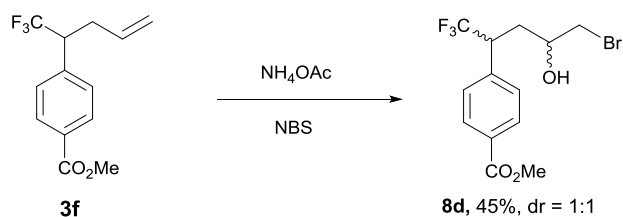

To a suspension of compound **1f** (0.2 mmol, 51.6 mg, 1 equiv) and  $\text{NH}_4\text{OAc}$  (0.02 mmol, 1.54 mg, 10 mol%) in acetone (0.8 mL), NBS (0.22 mmol, 39.15 mg, 1.1 equiv) and water (0.2 mL) were added and the mixture was stirred at room temperature. After completion of the reaction as indicated by TLC the mixture was concentrated *in vacuo* and extracted with ethyl acetate and water (1:1) (3  $\times$  5 mL). The organic portion was concentrated and the residue was subjected to silica gel column chromatography (by using 8:2 hexane/ethyl acetate as an eluents) to obtain pure product **8d**. Yield 45%, oil.  $^1\text{H}$  NMR (500 MHz,  $\text{CDCl}_3$ )  $\delta$  8.06 (d,  $J$  = 7.9 Hz, 2H), 7.43 (d,  $J$  = 8.1 Hz, 2H), 3.93 (s, 3H), 3.83–3.68 (m, 3H), 3.60–3.50 (m, 1H), 2.51–2.35 (m, 2H).  $^{13}\text{C}$  NMR (126 MHz,  $\text{CDCl}_3$ , major + minor isomers)  $\delta$  166.64, 139.42 (minor), 137.96 (major), 130.81 (major), 130.62 (minor), 130.40 (major), 130.34 (minor), 129.39 (major), 129.15 (minor), 126.45 (q,  $J$  = 279.9 Hz, major), 126.35 (d,  $J$  = 280.5 Hz, minor), 67.38 (major), 66.49 (minor), 54.69 (major), 54.40 (minor), 52.45, 48.59 (q,  $J$  = 27.5 Hz, major), 47.99 (q,  $J$  = 27.2 Hz, minor), 35.12 (minor), 33.98 (major).  $^{19}\text{F}$  NMR (282 MHz,  $\text{CDCl}_3$ )  $\delta$  –69.36 (d,  $J$  = 8.2 Hz, 3F, minor), –69.70 (d,  $J$  = 8.8 Hz, 3F, major). HRMS (ESI) calculated for  $\text{C}_{13}\text{H}_{14}\text{BrO}_3\text{F}_3\text{Na}$   $[\text{M} + \text{Na}]^+$ : 376.9976, found: 376.9977.

### 8. References:

- (a) R. Anilkumar and D. J. Burton, *J. Fluorine Chem.* 2005, **126**, 1174–1184. (b) T. Okano, K. Ito, T. Ueda and H. Muramatsu, *J. Fluorine Chem.* 1986, **32**, 377–388. (c) Y. Gong and K. Katob, *J. Fluorine Chem.* 2003, **121**, 141–146.

**9. NMR Data**  
**( $^1\text{H}$  NMR ,  $^{13}\text{C}$  NMR and  $^{19}\text{F}$ -NMR)**

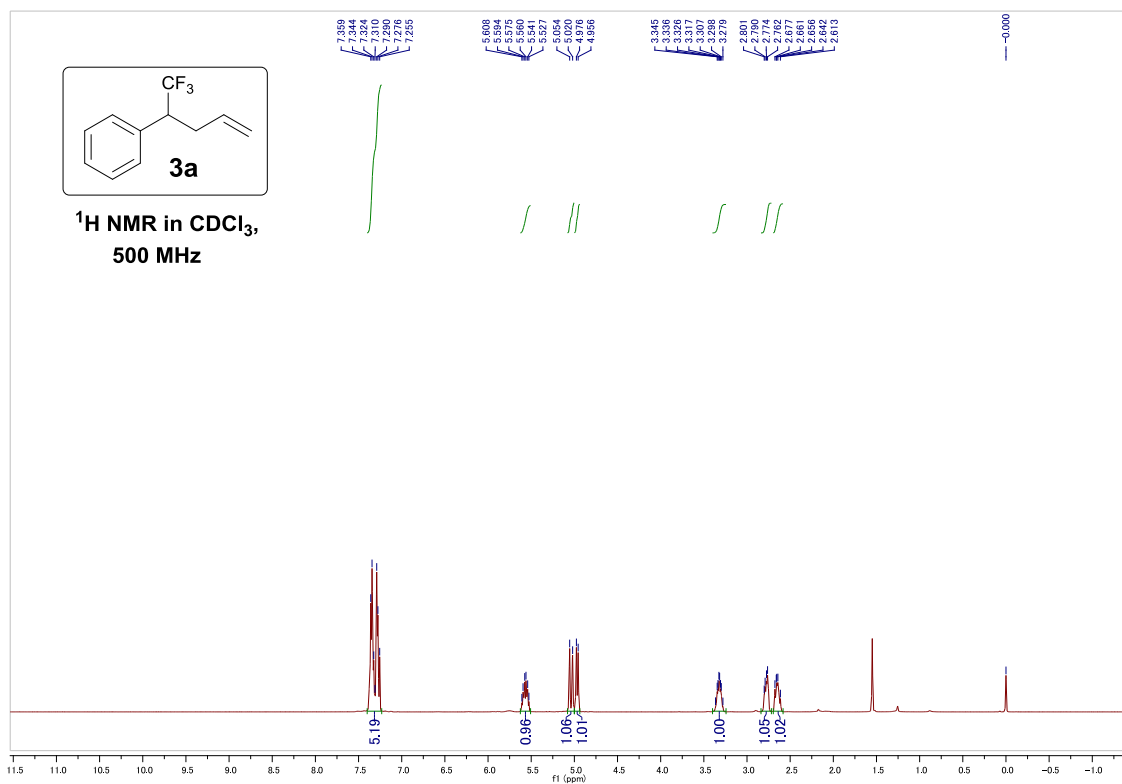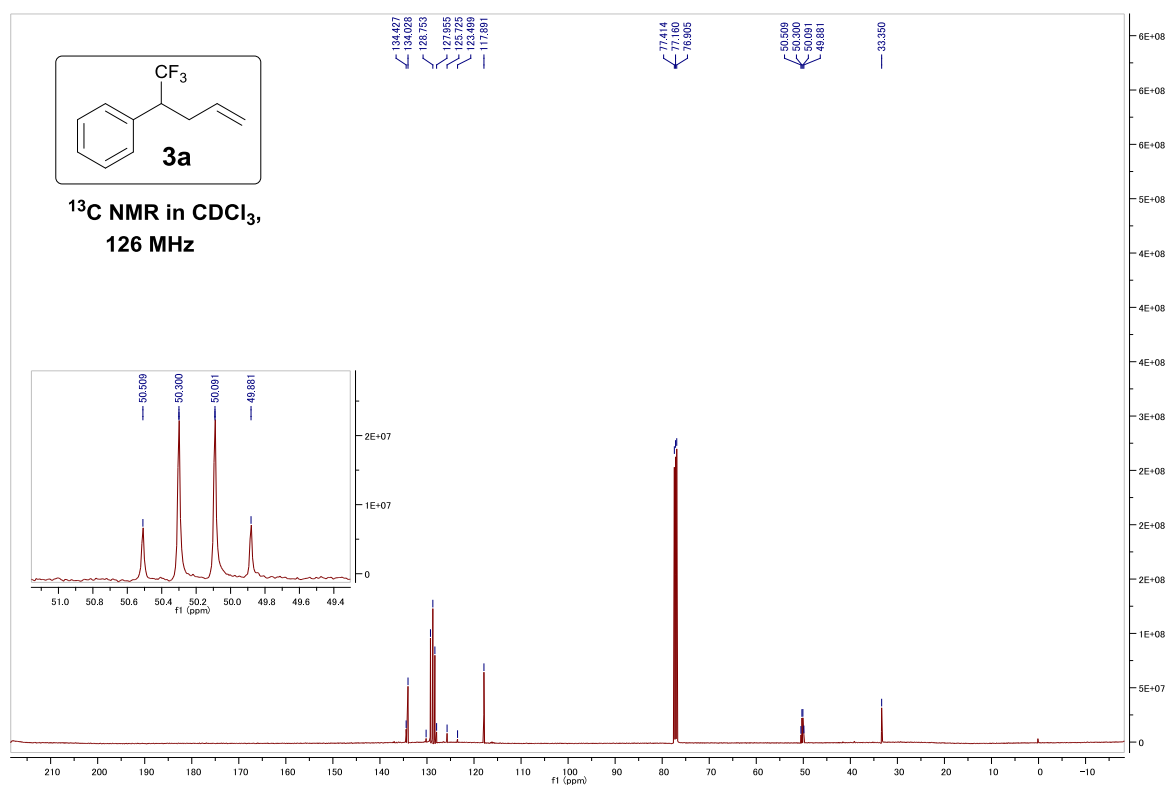

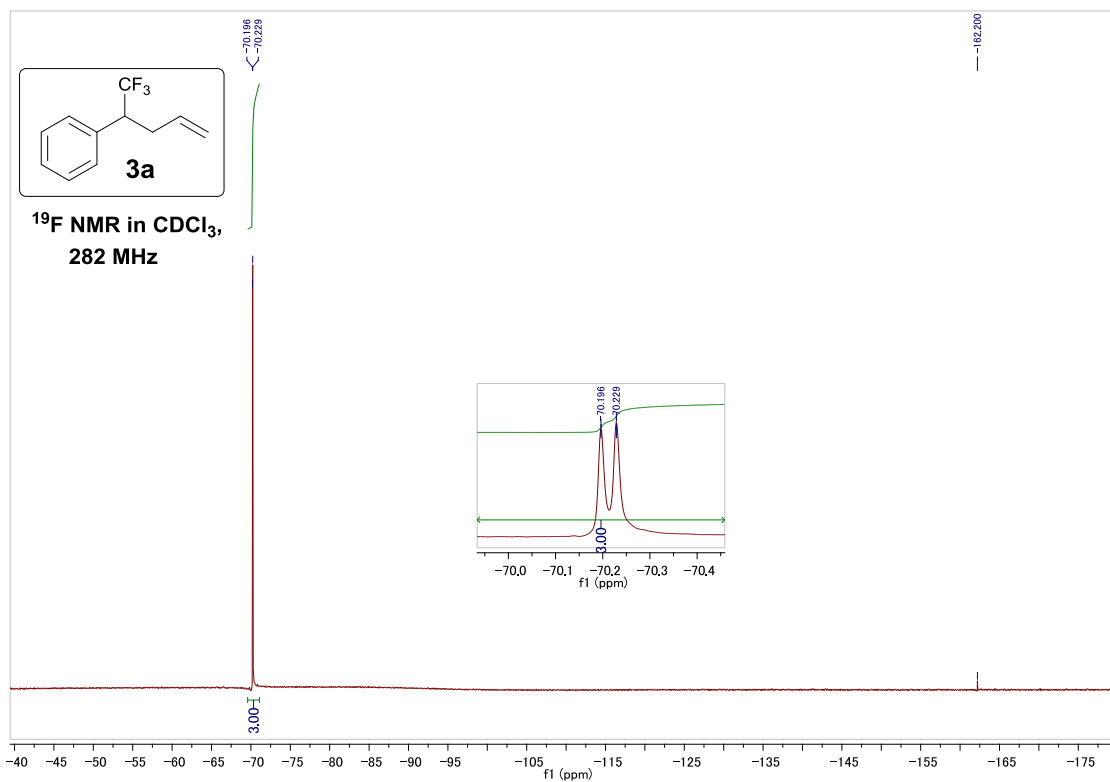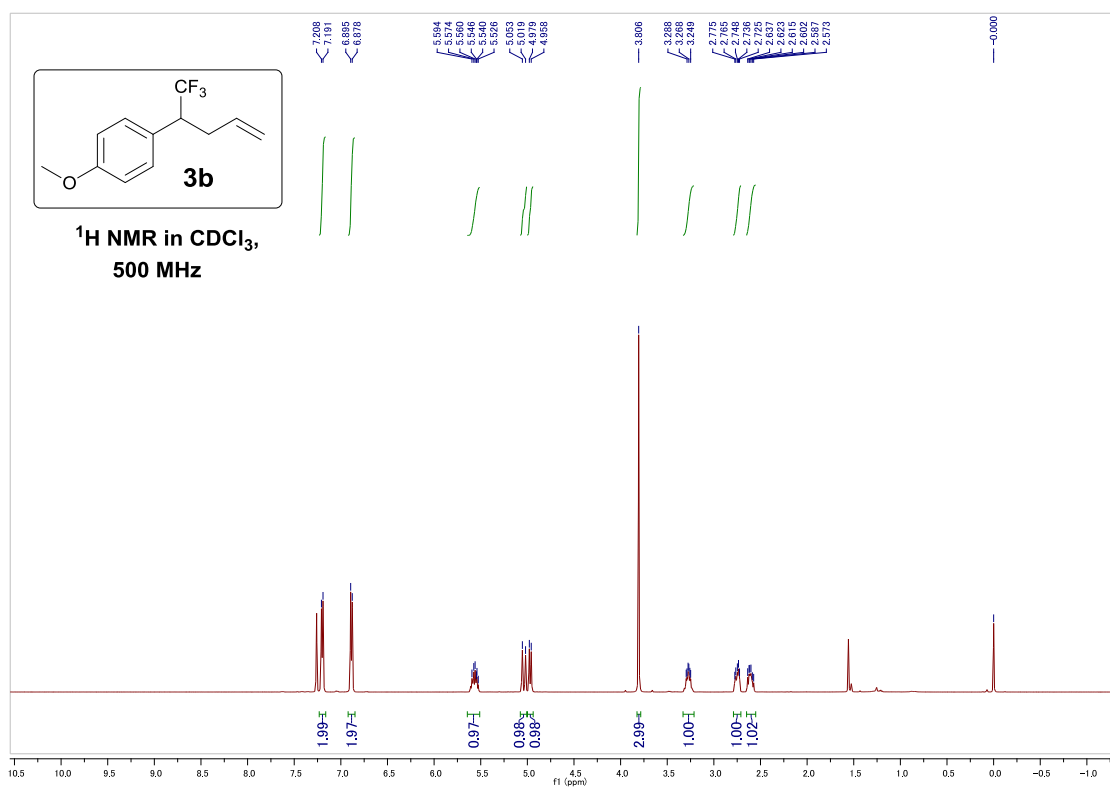

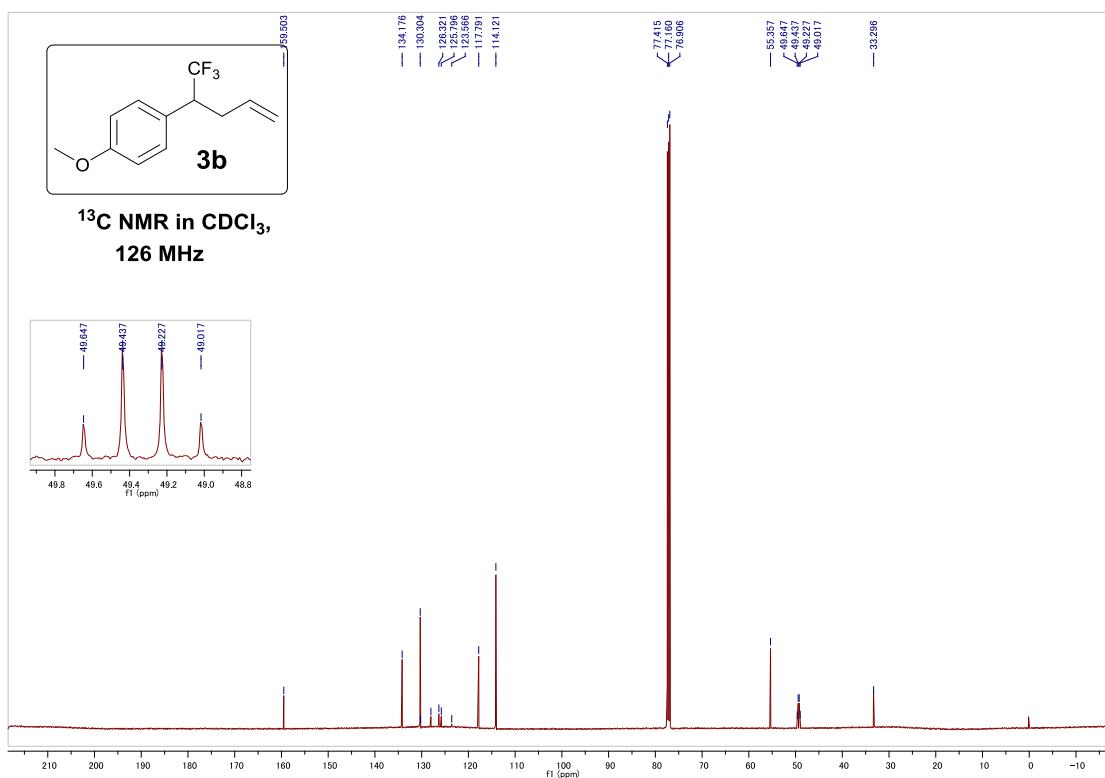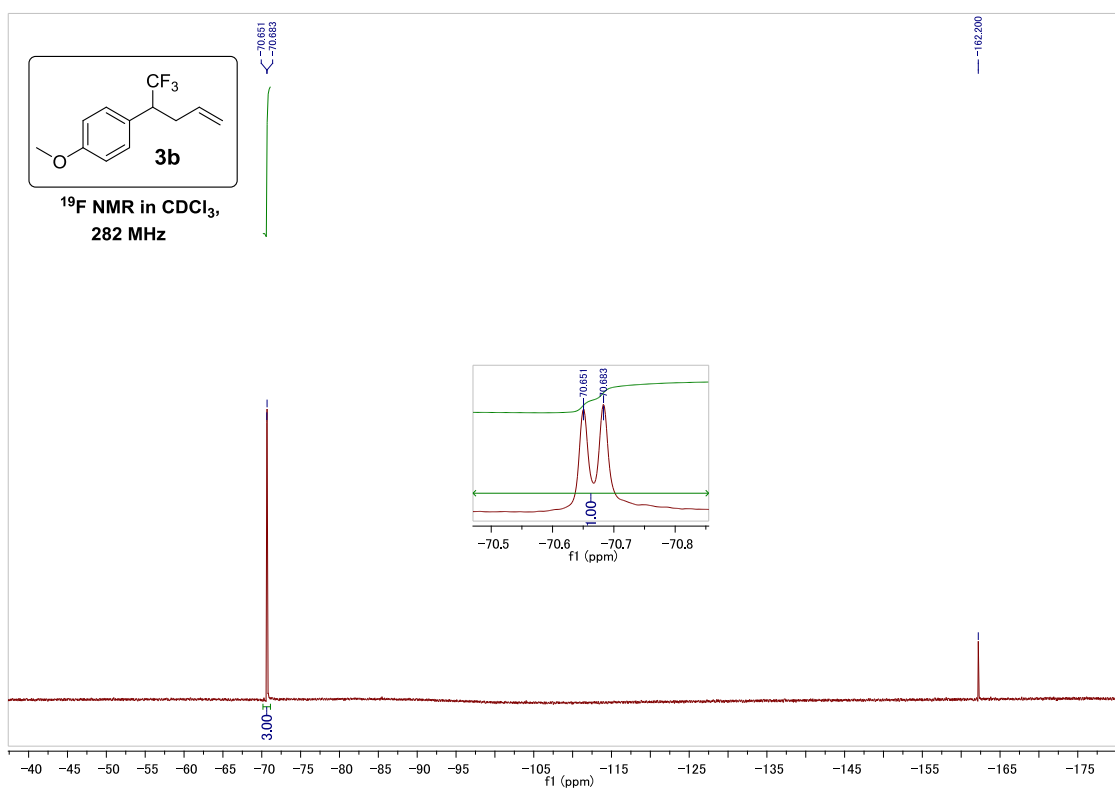

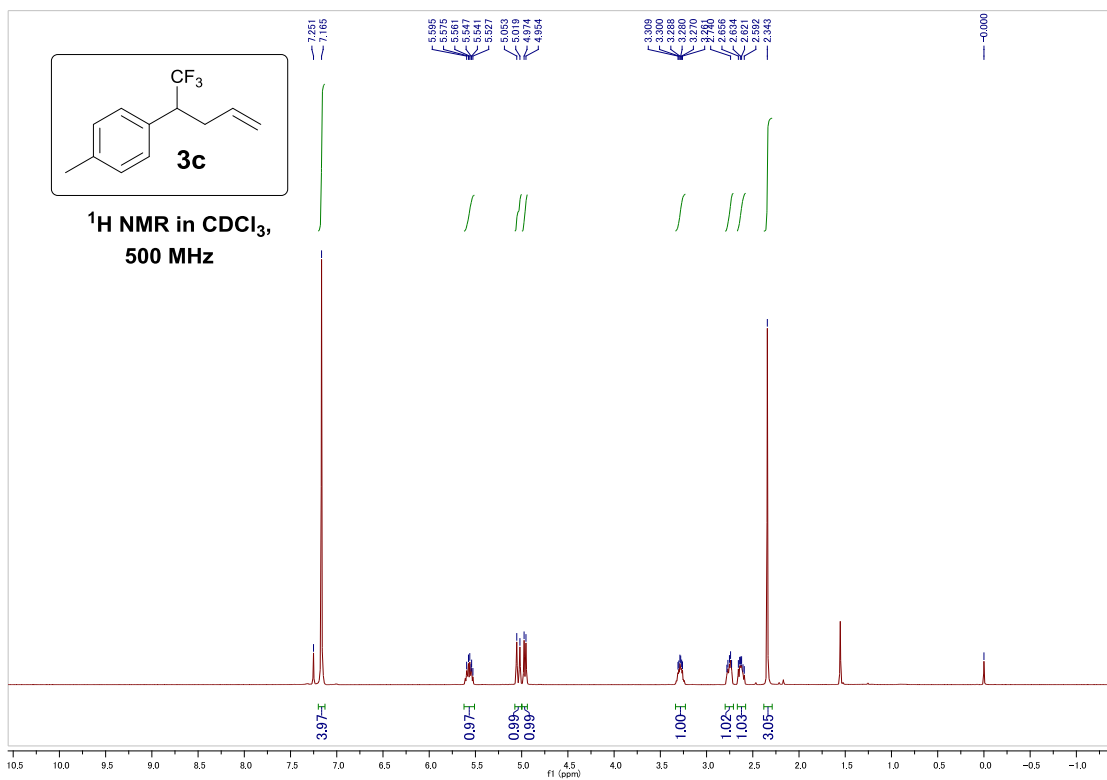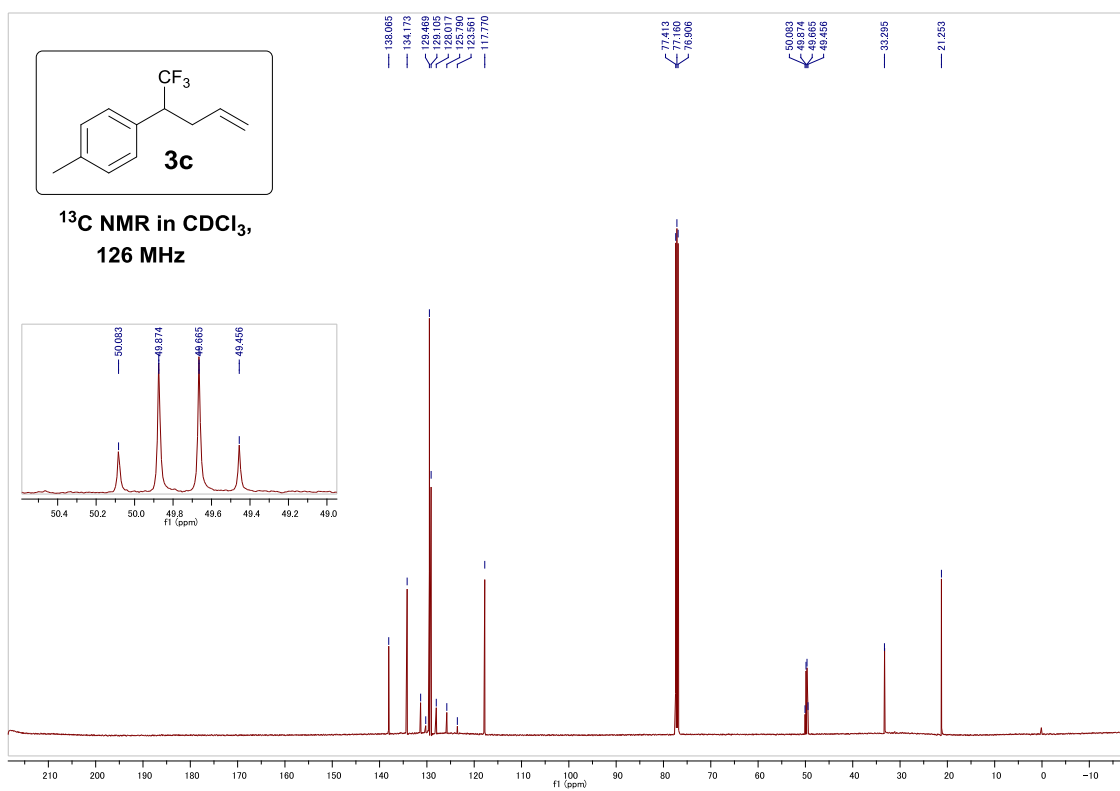



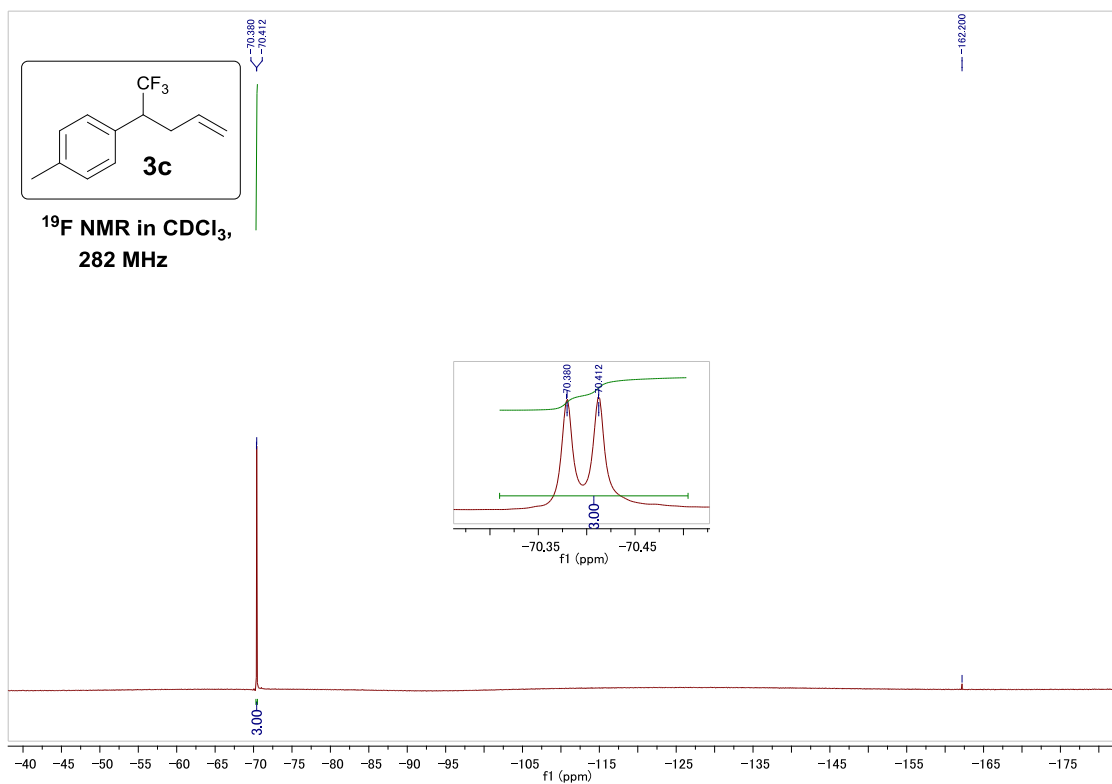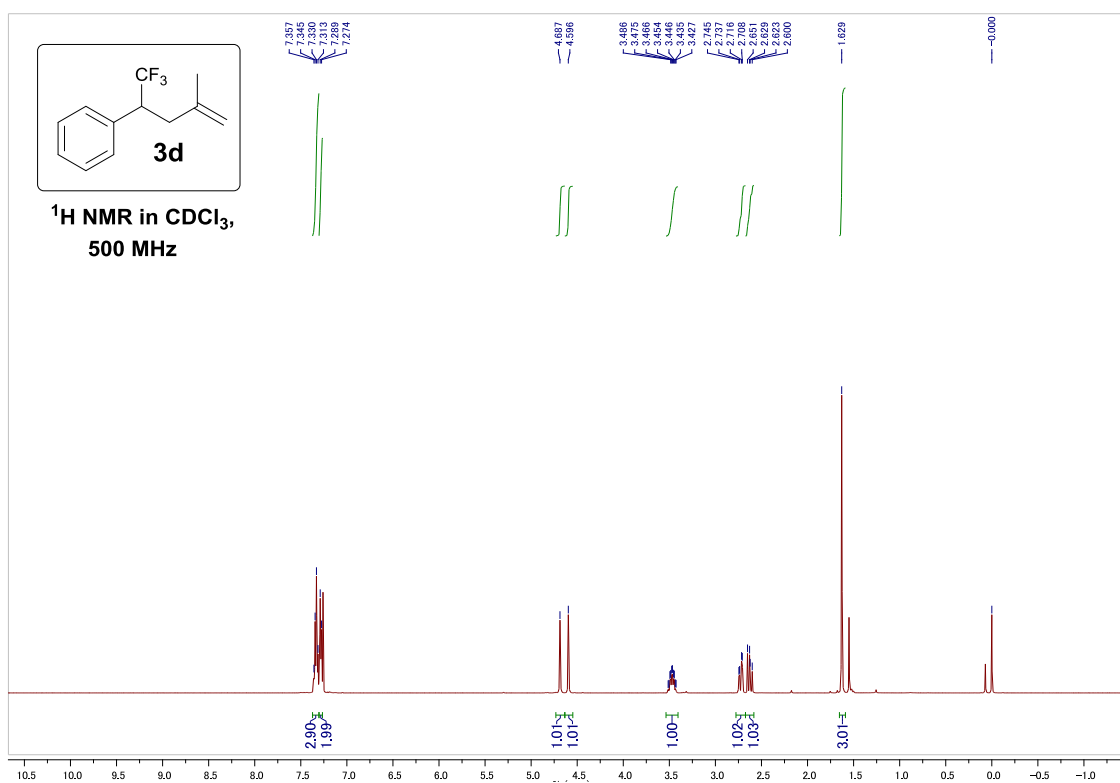

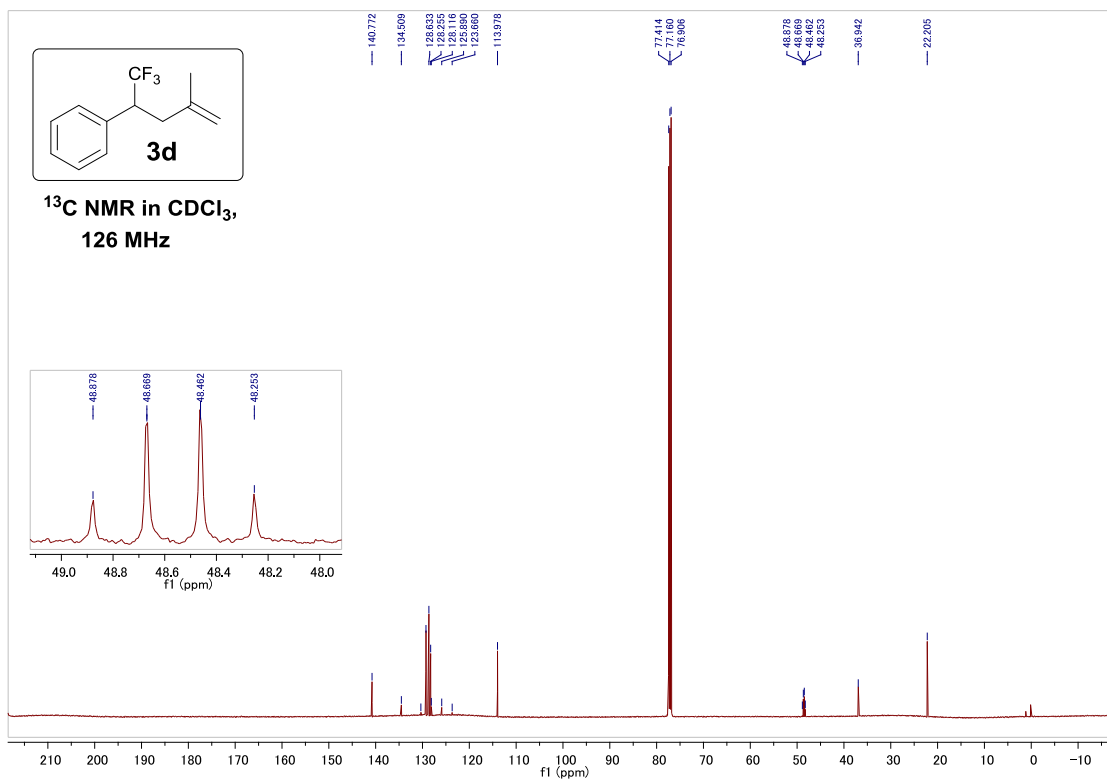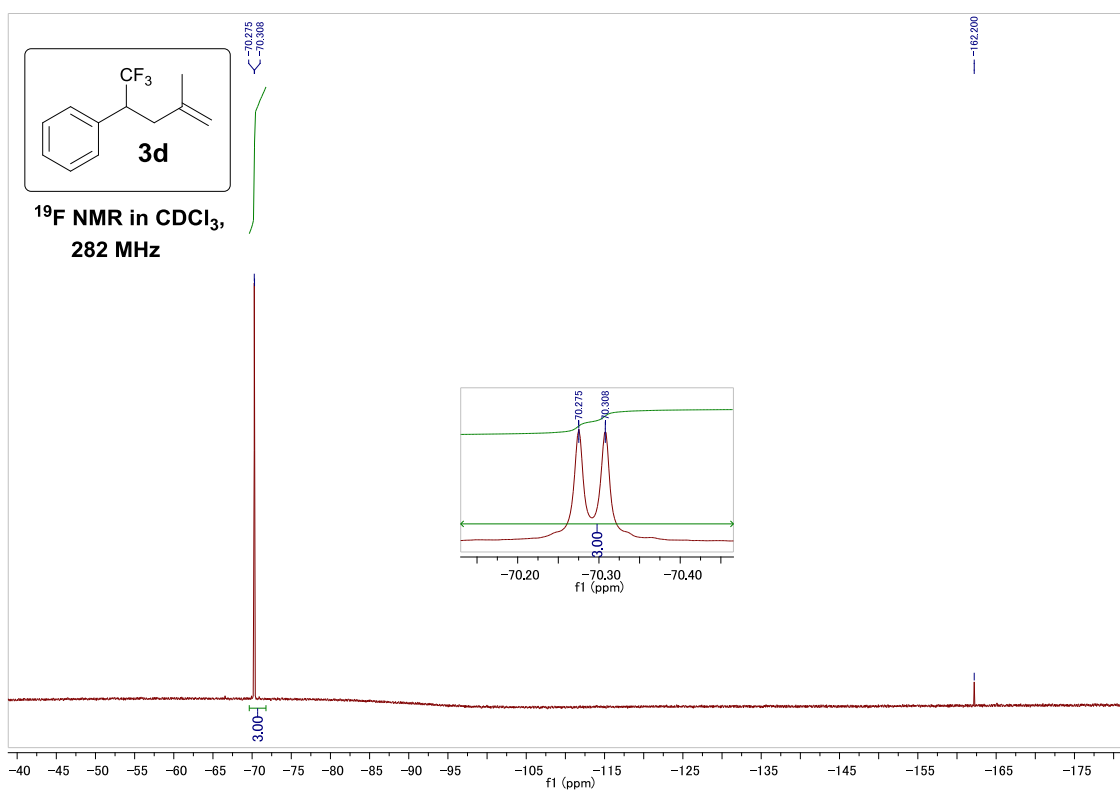

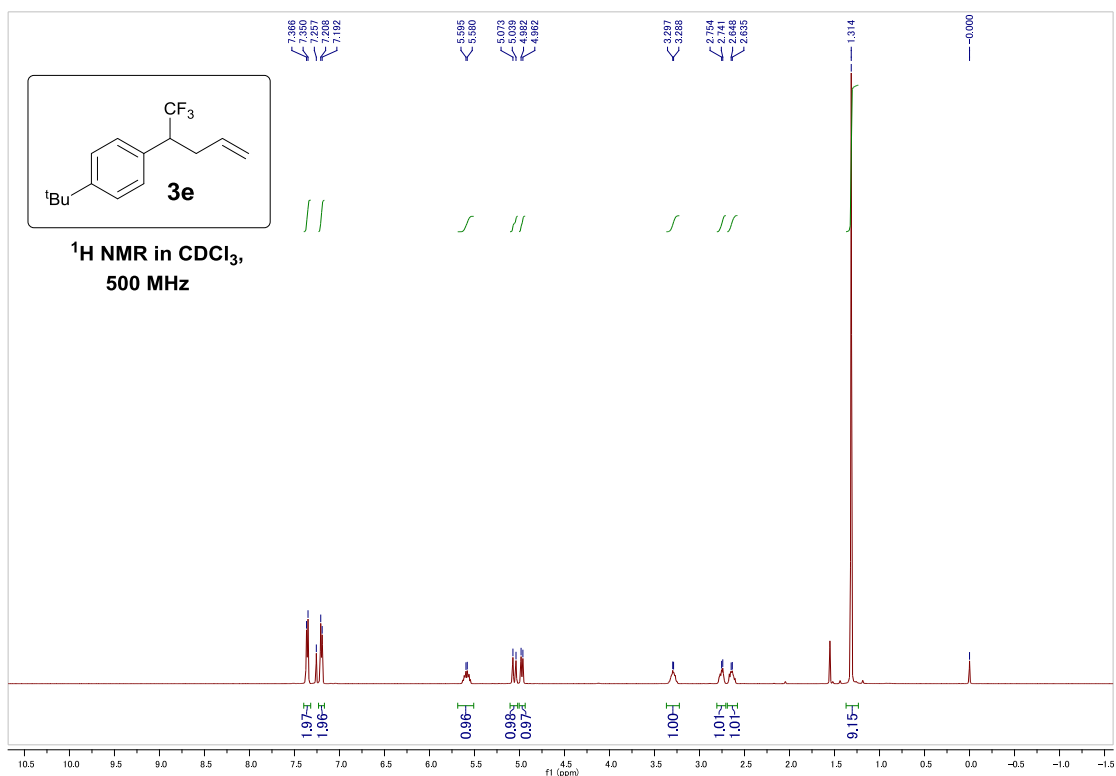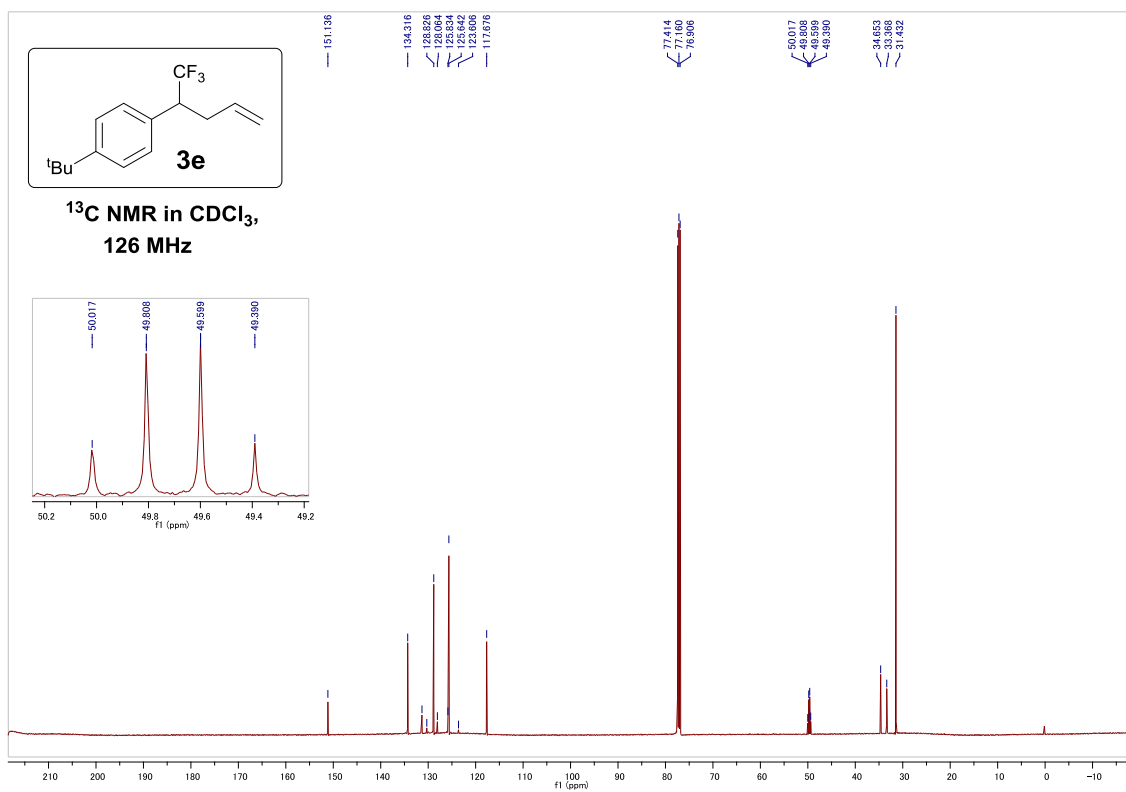

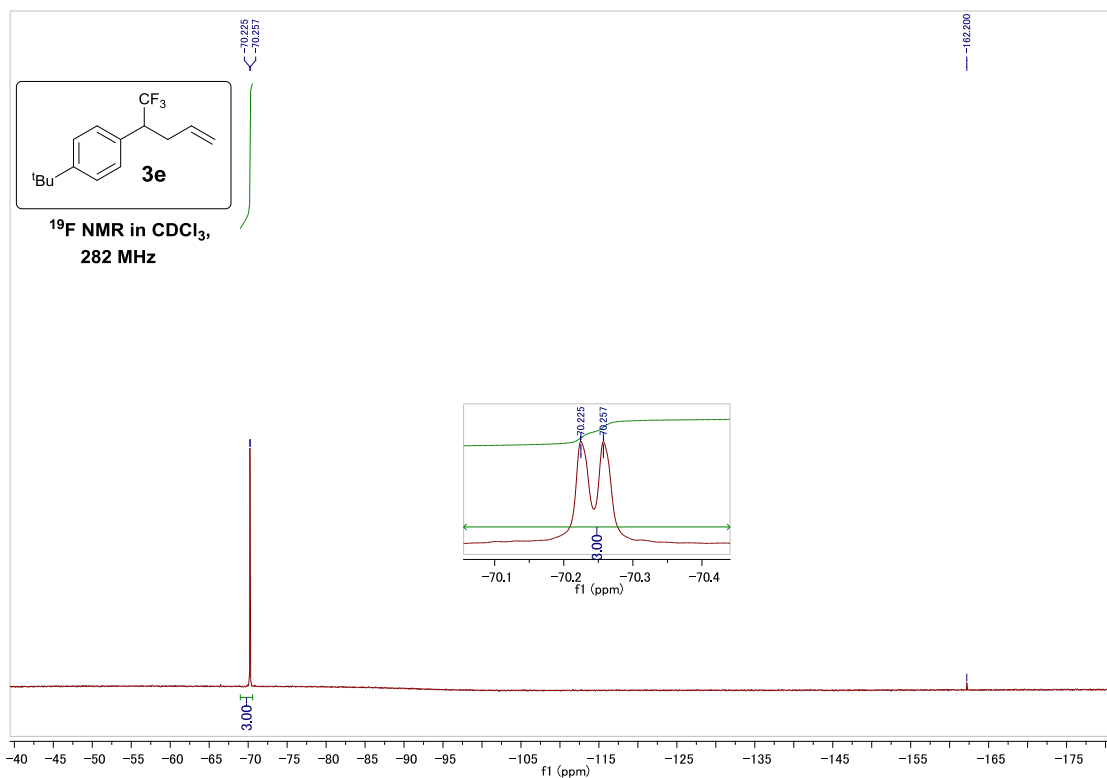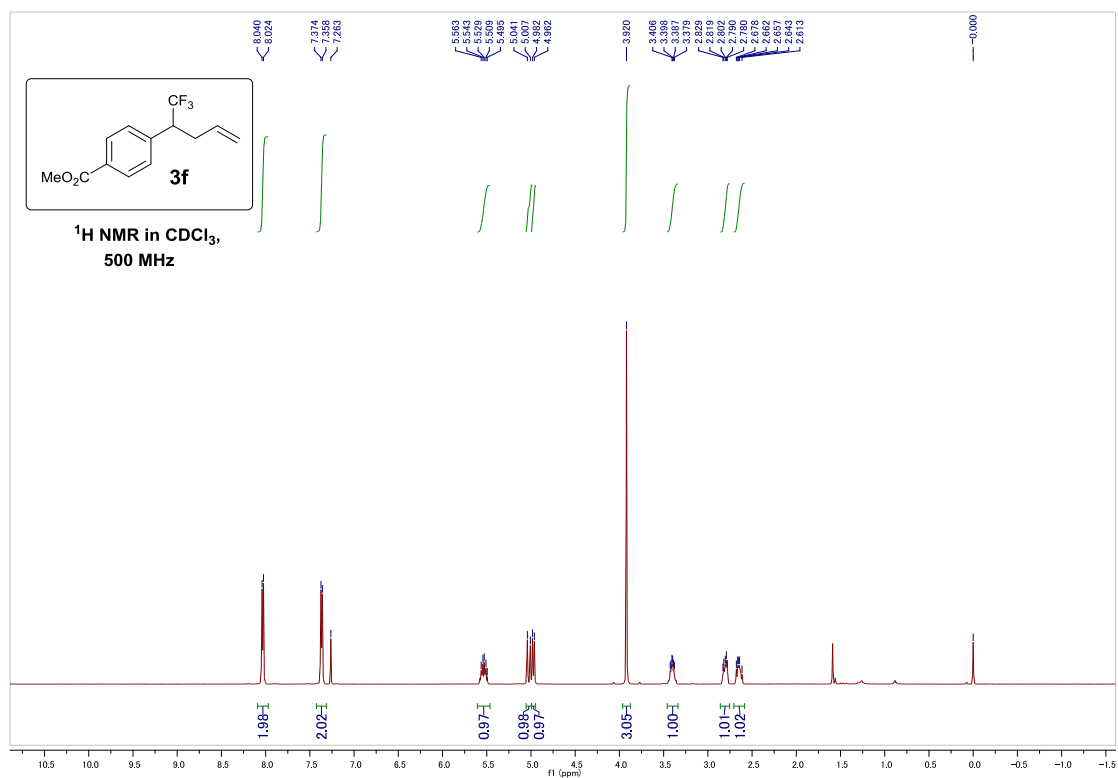

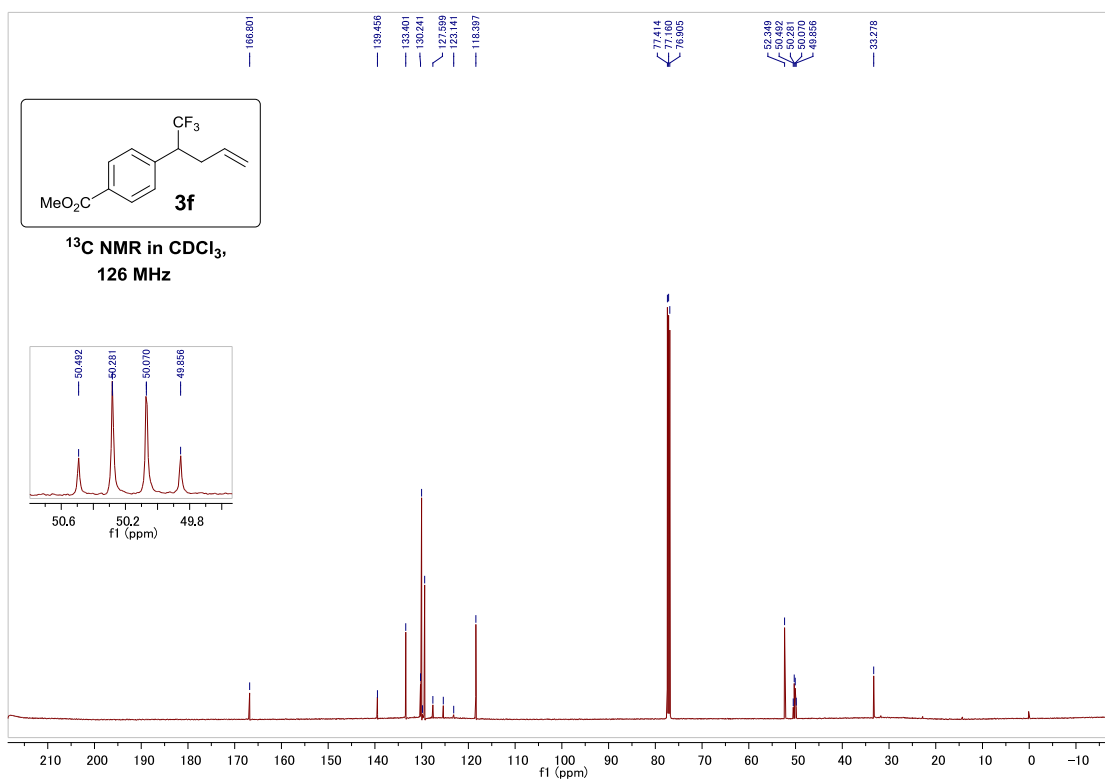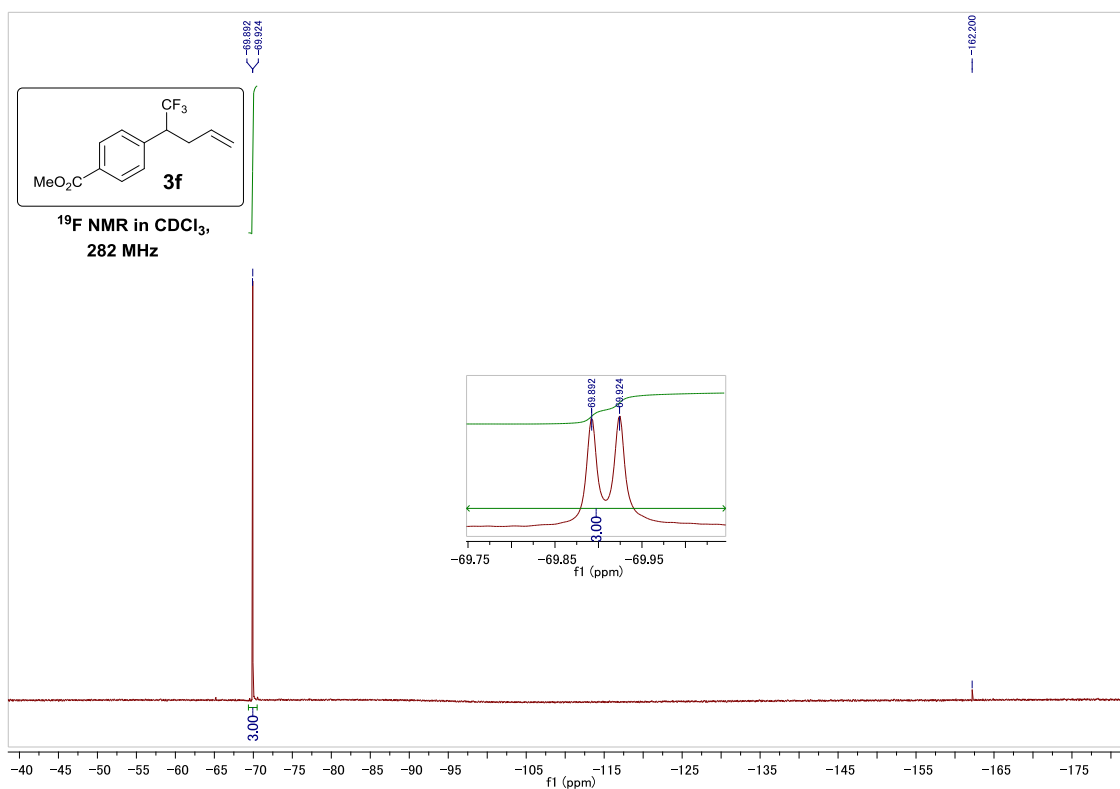

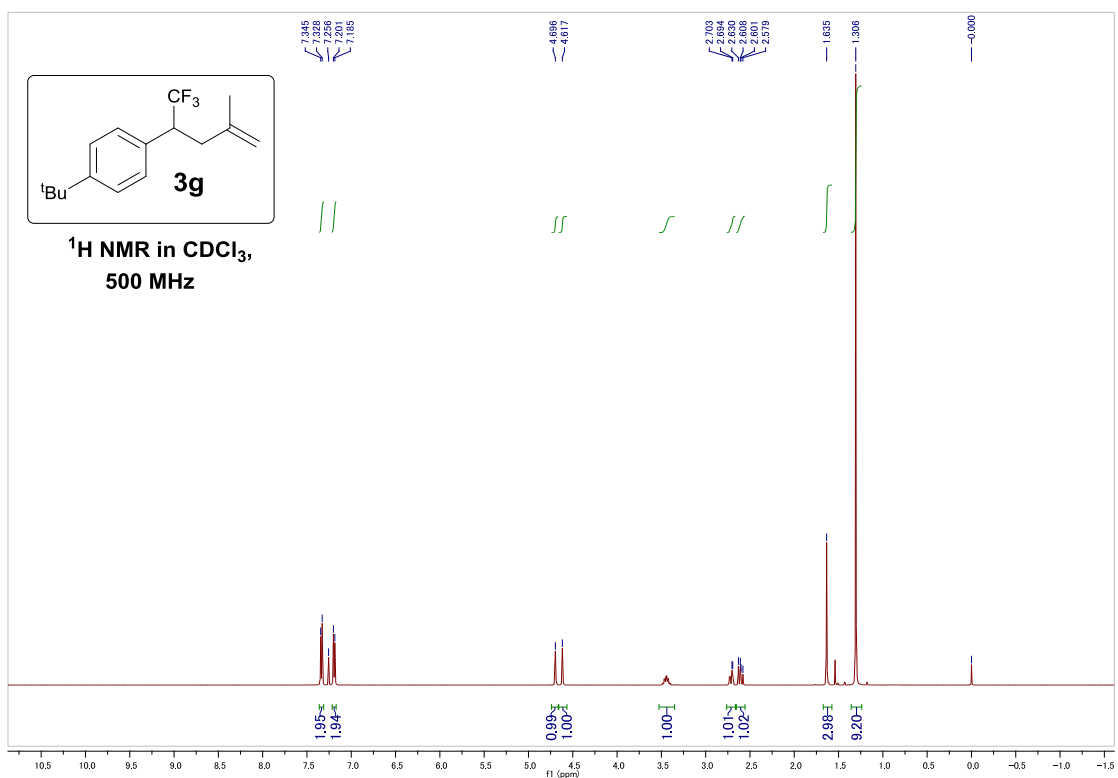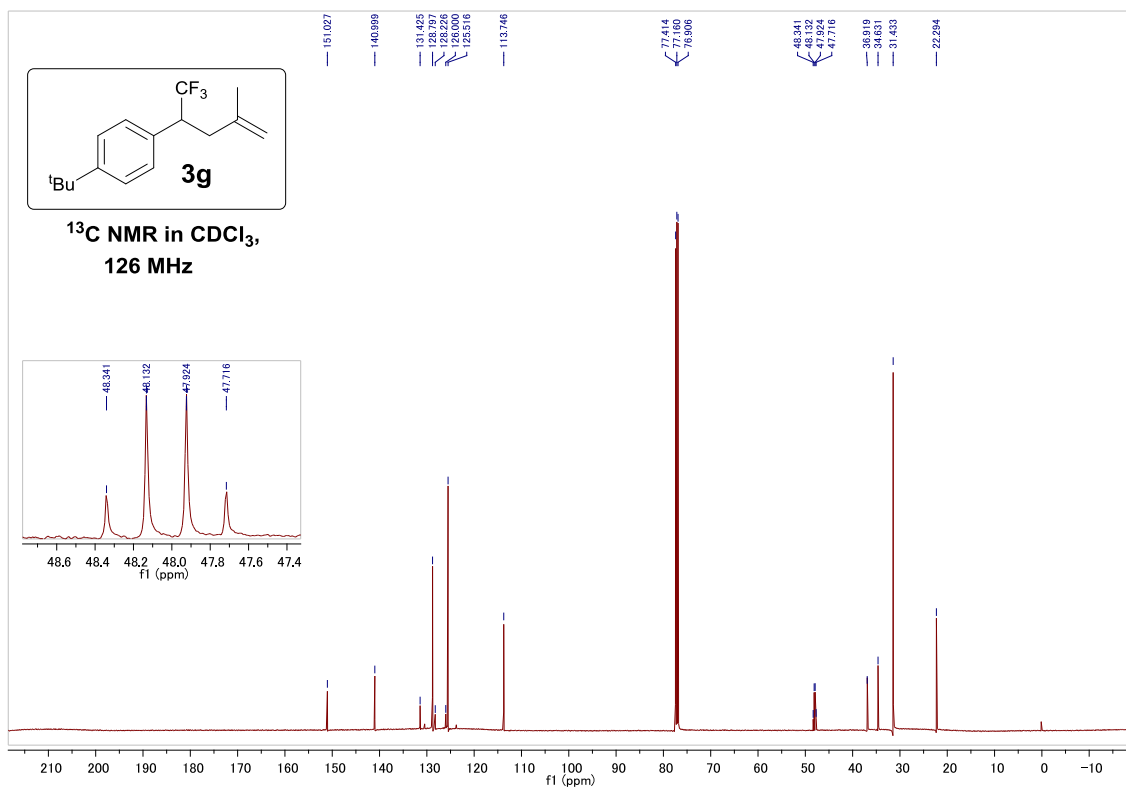

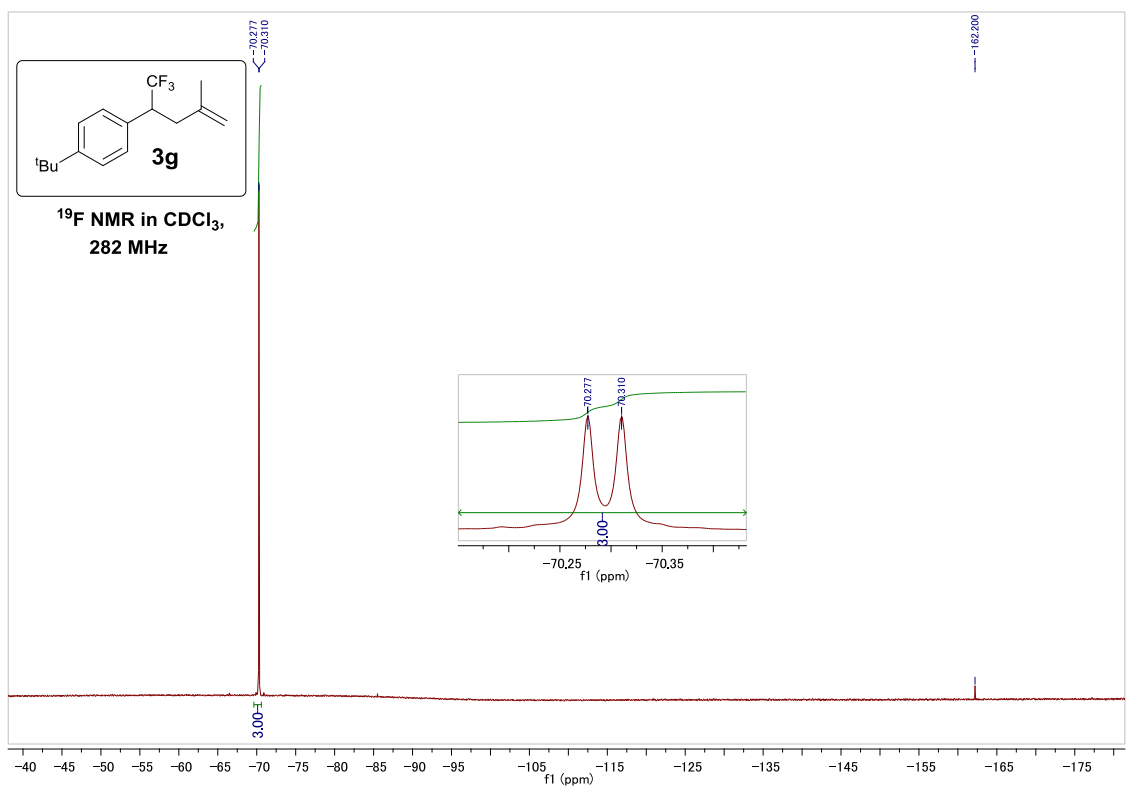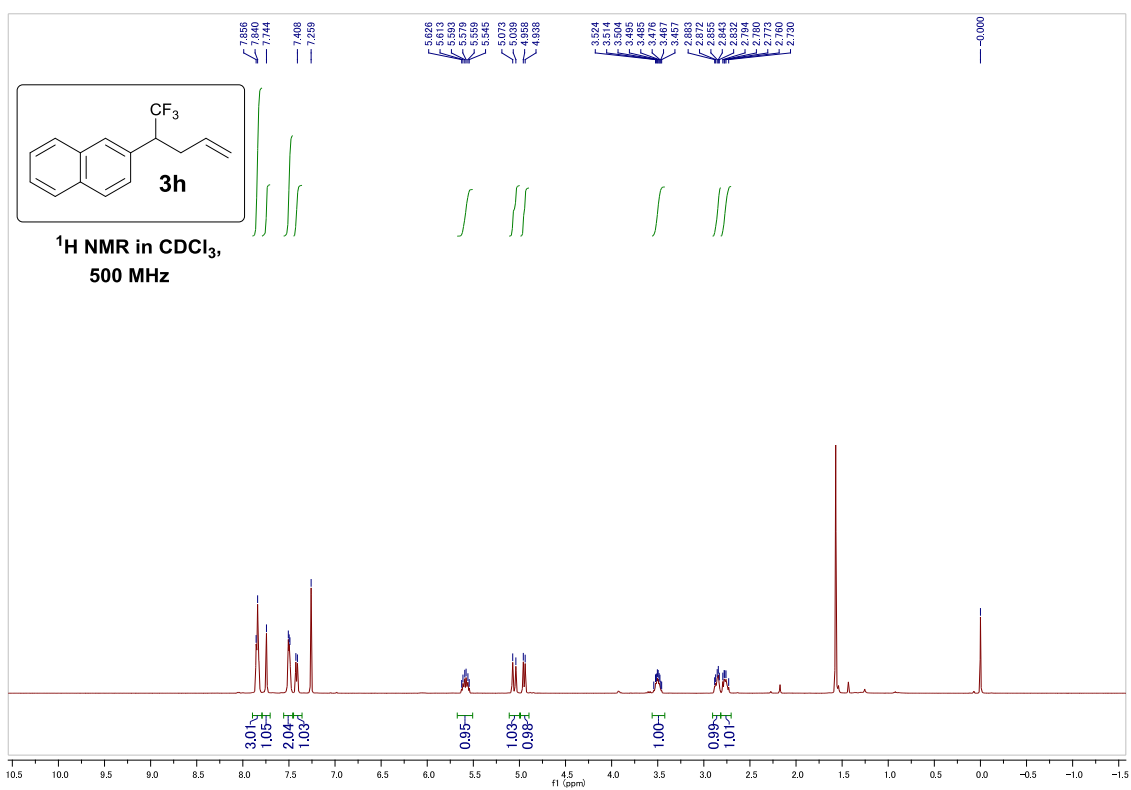

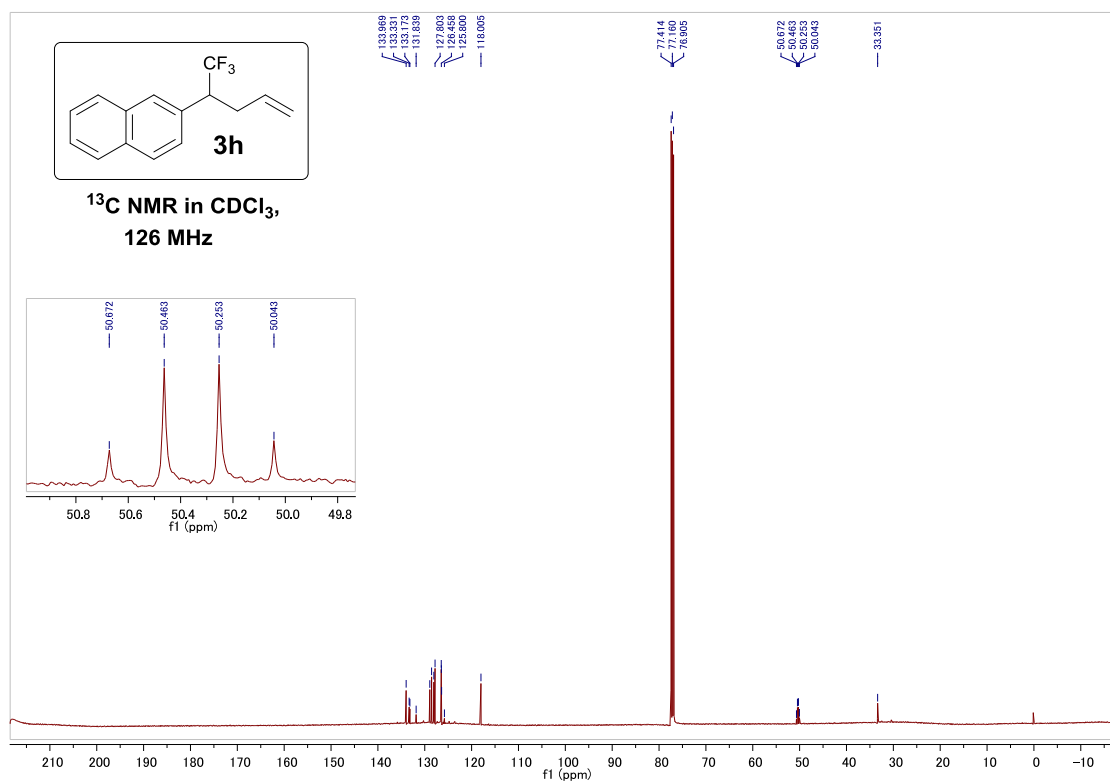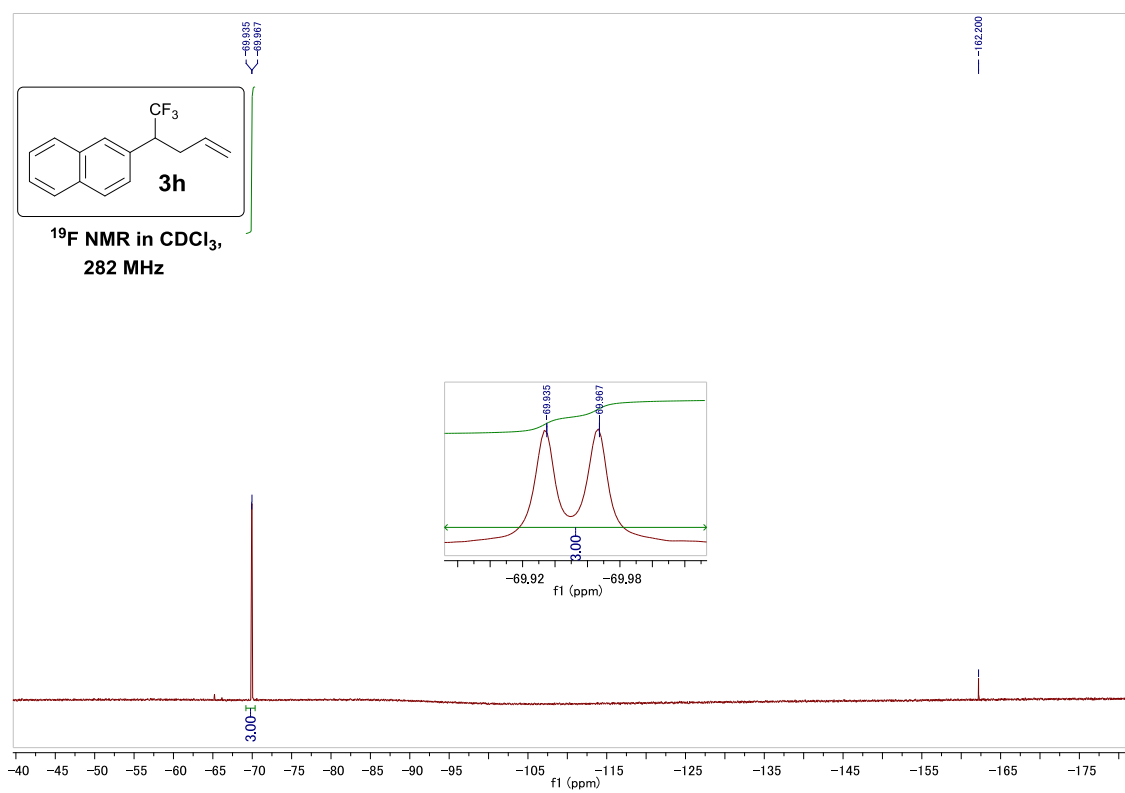



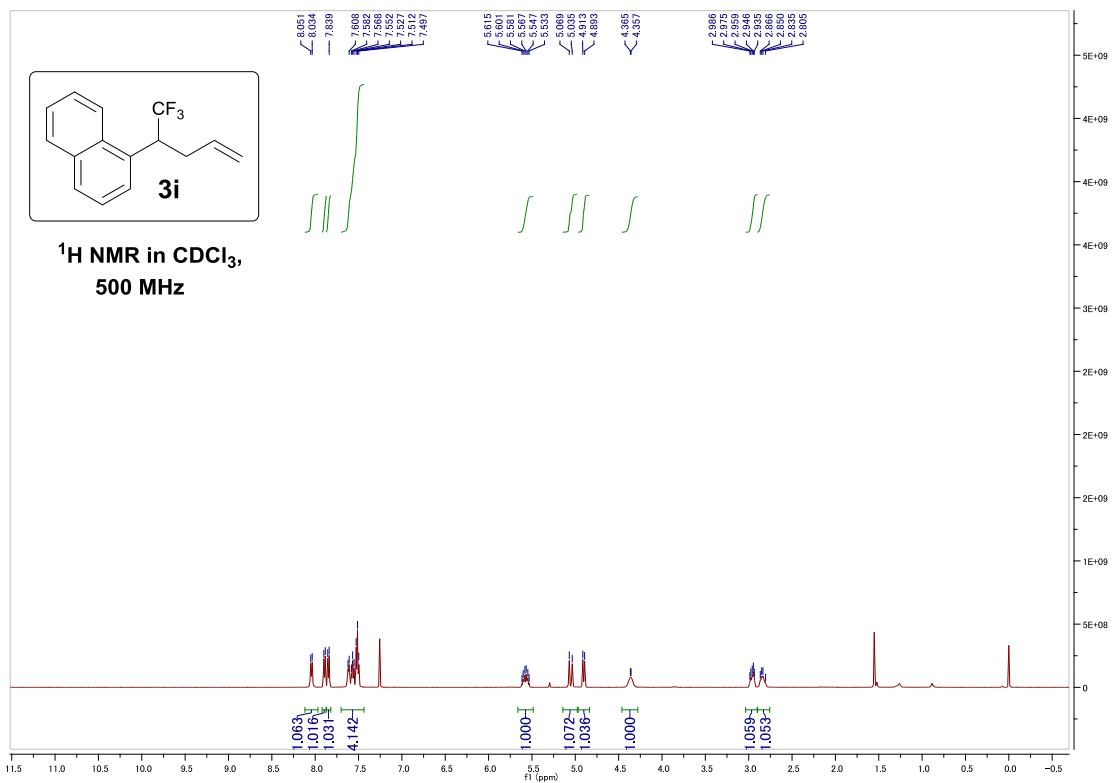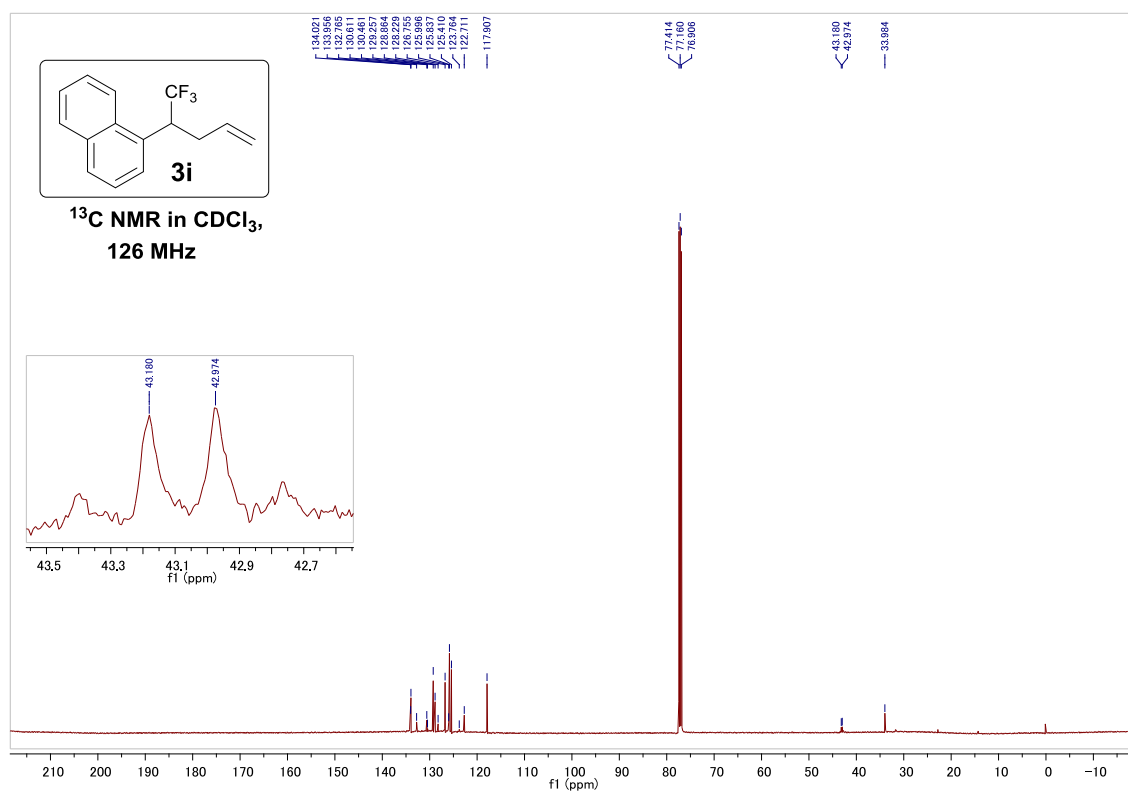

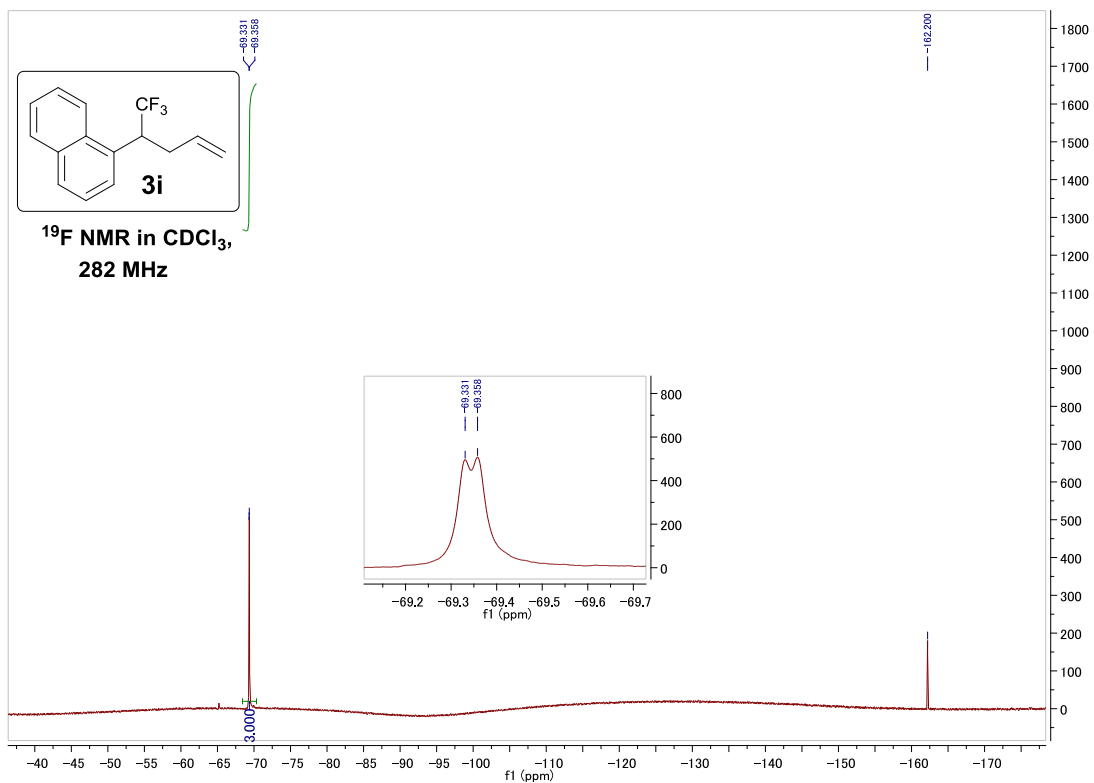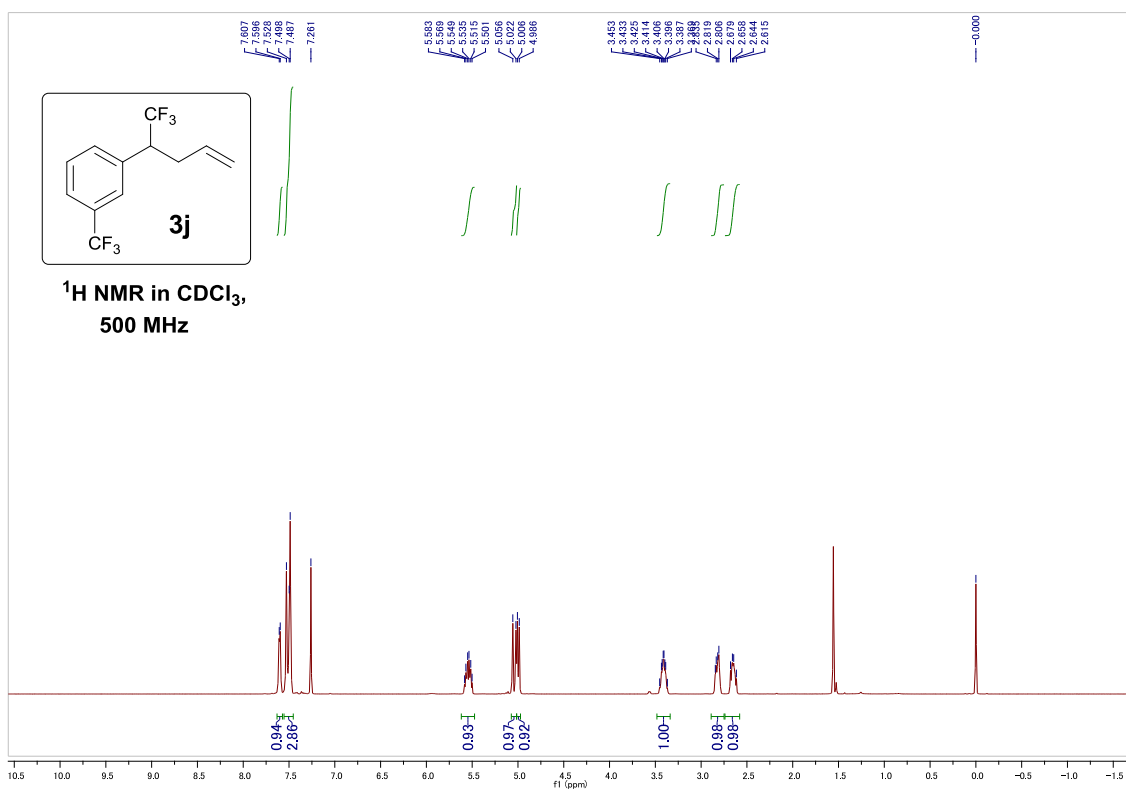

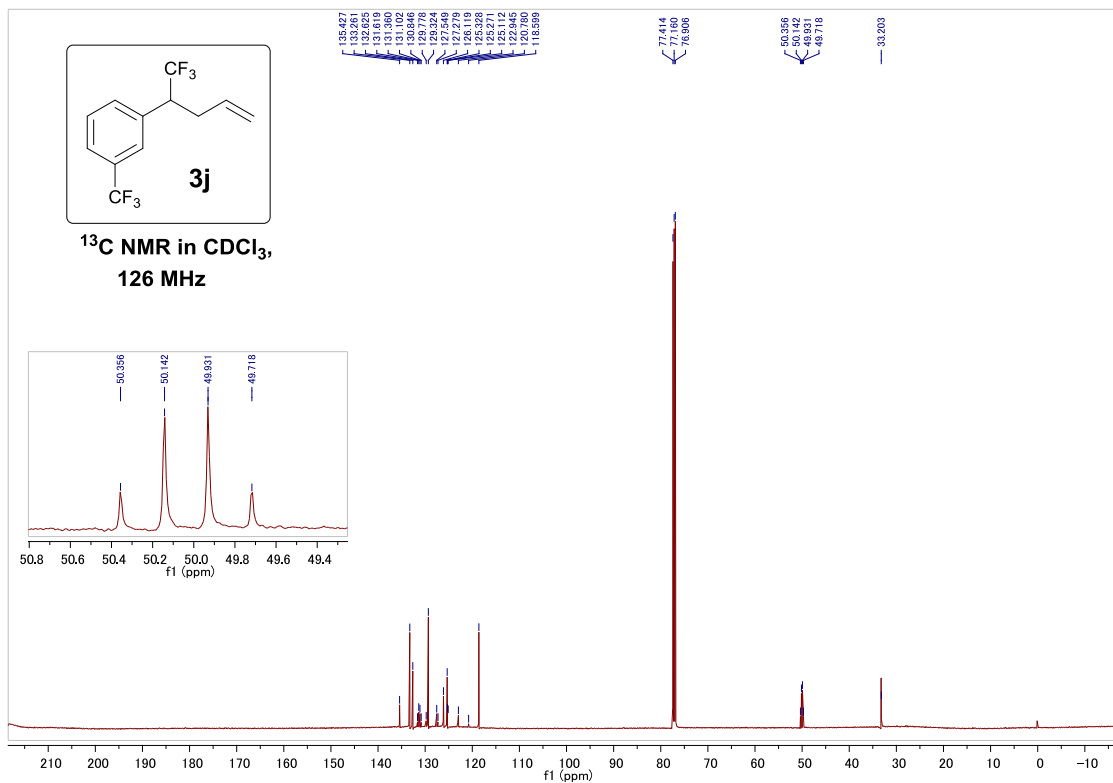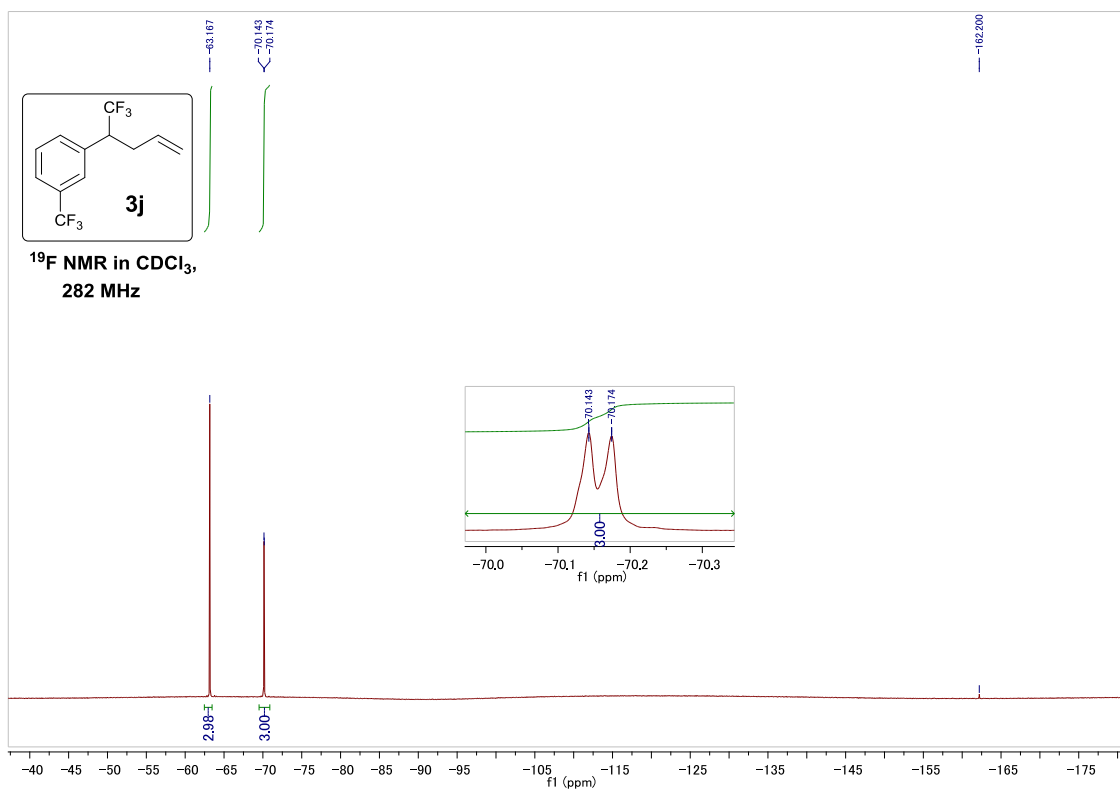

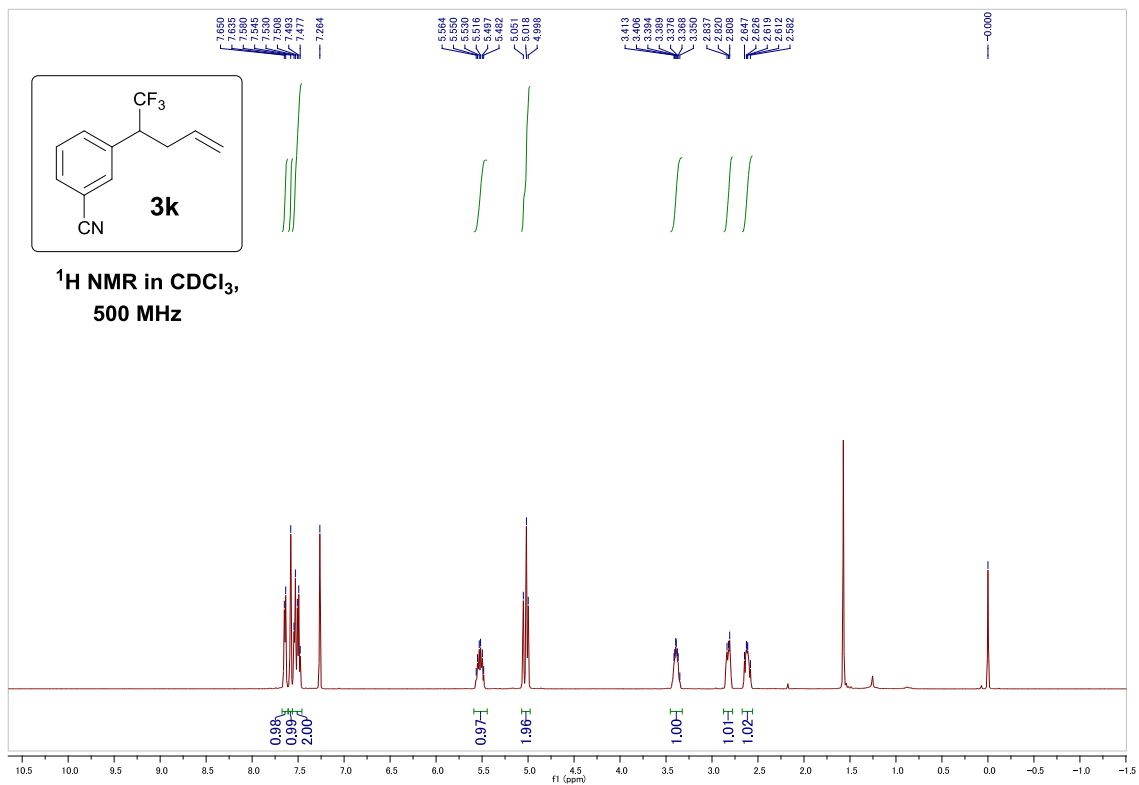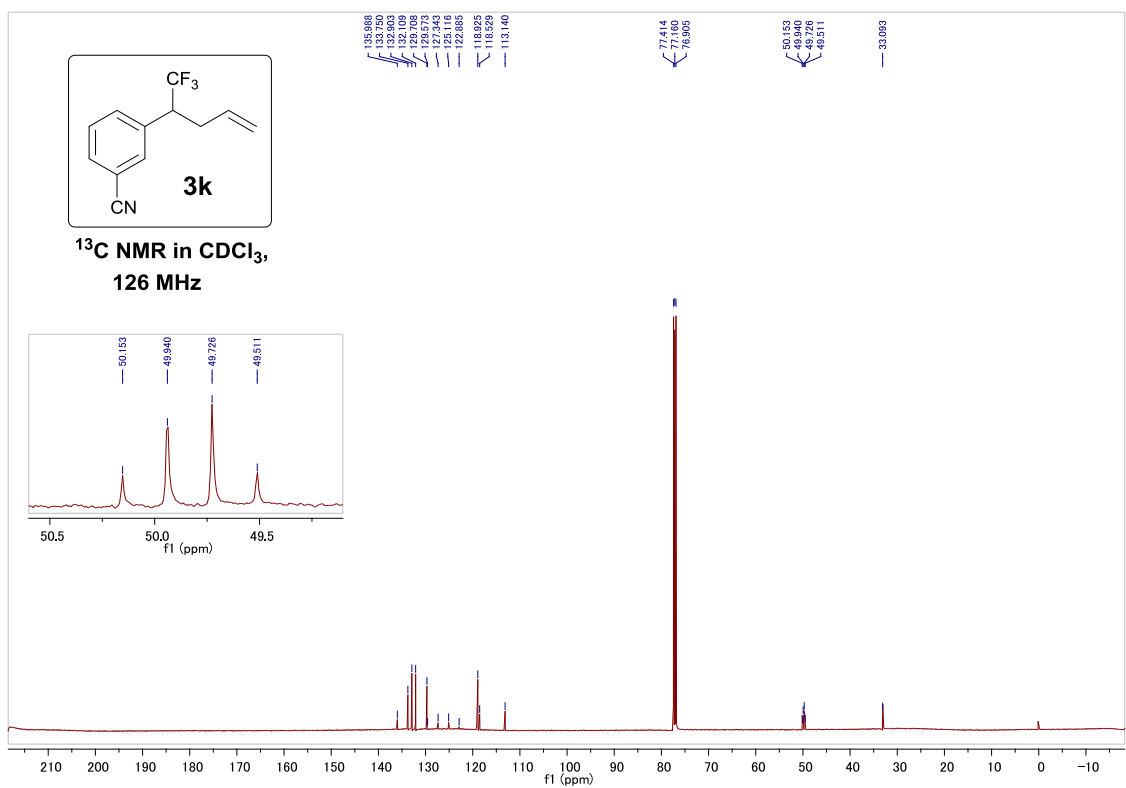

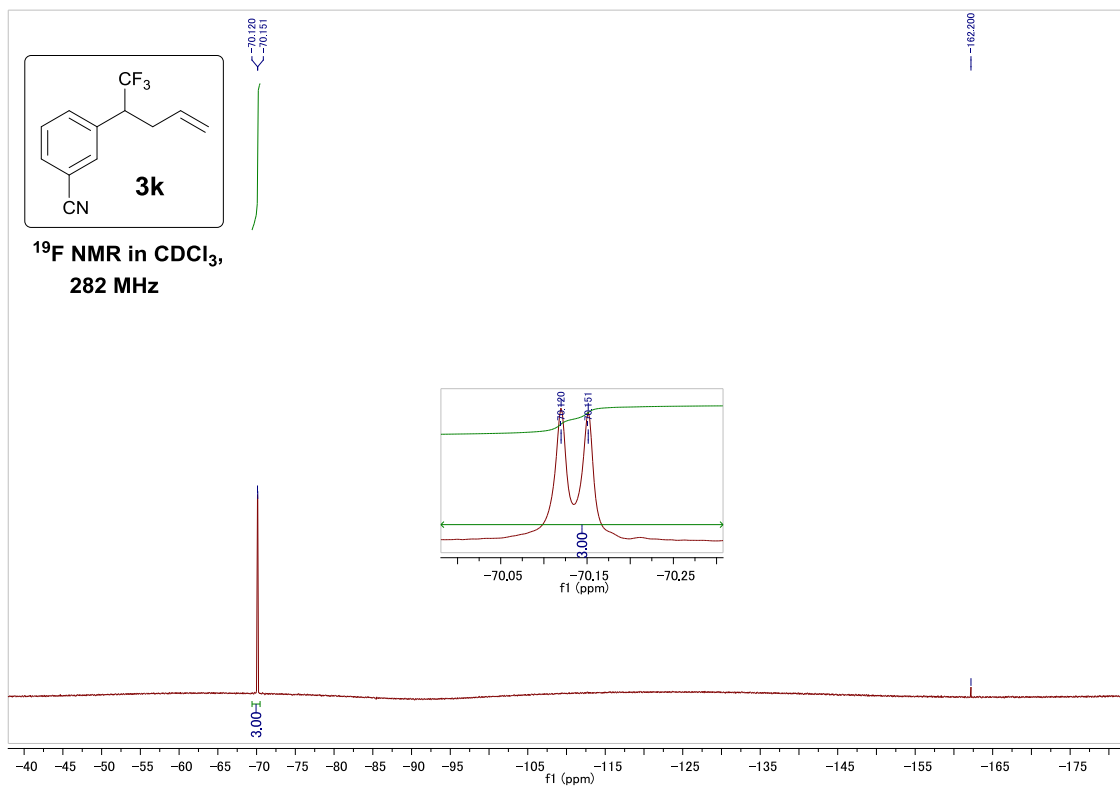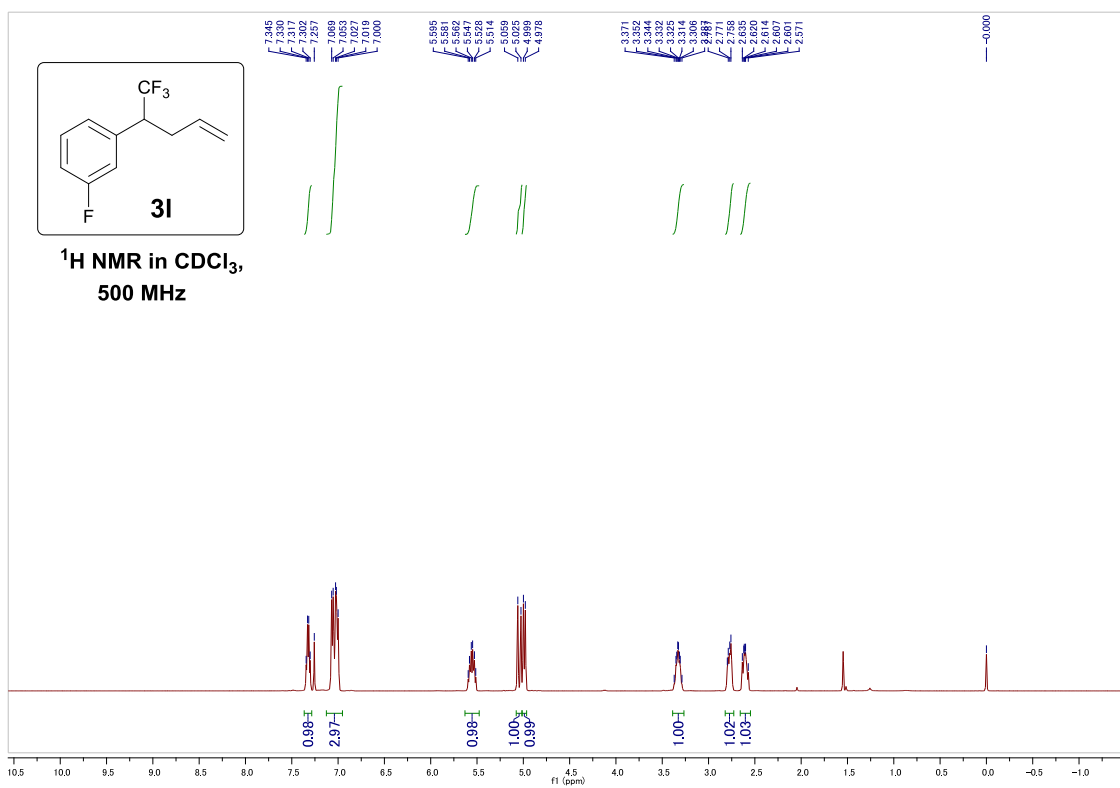

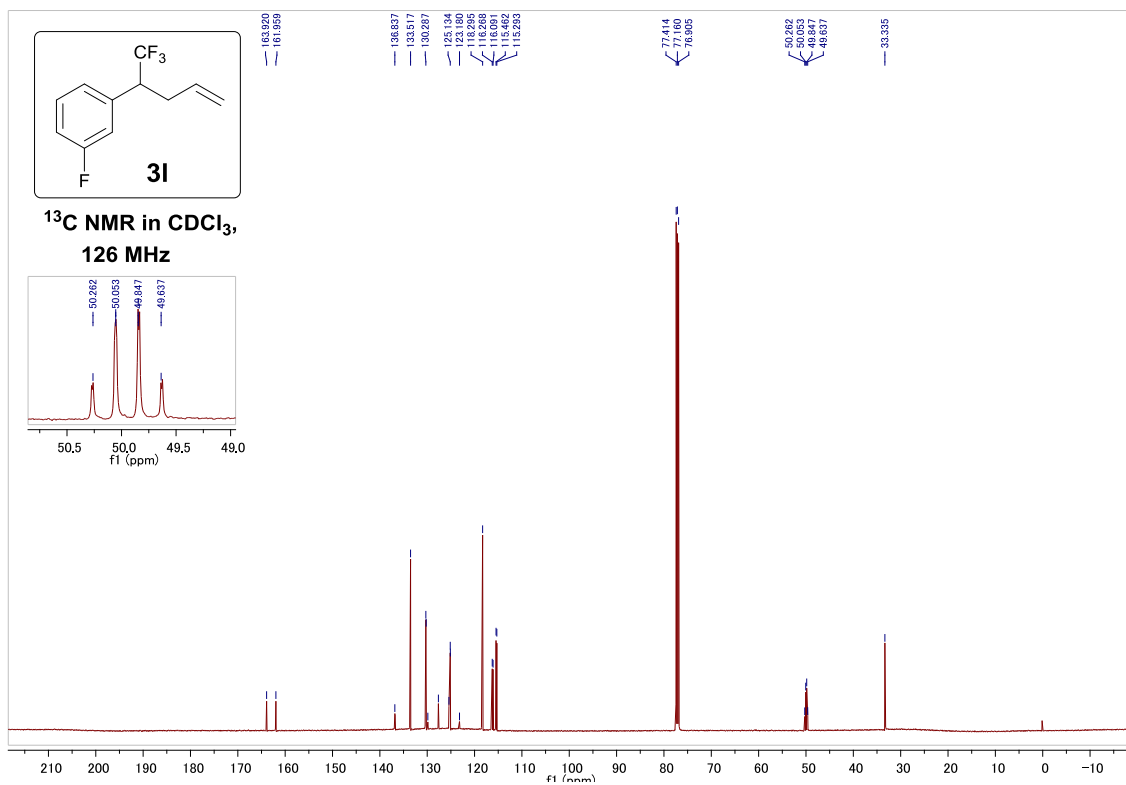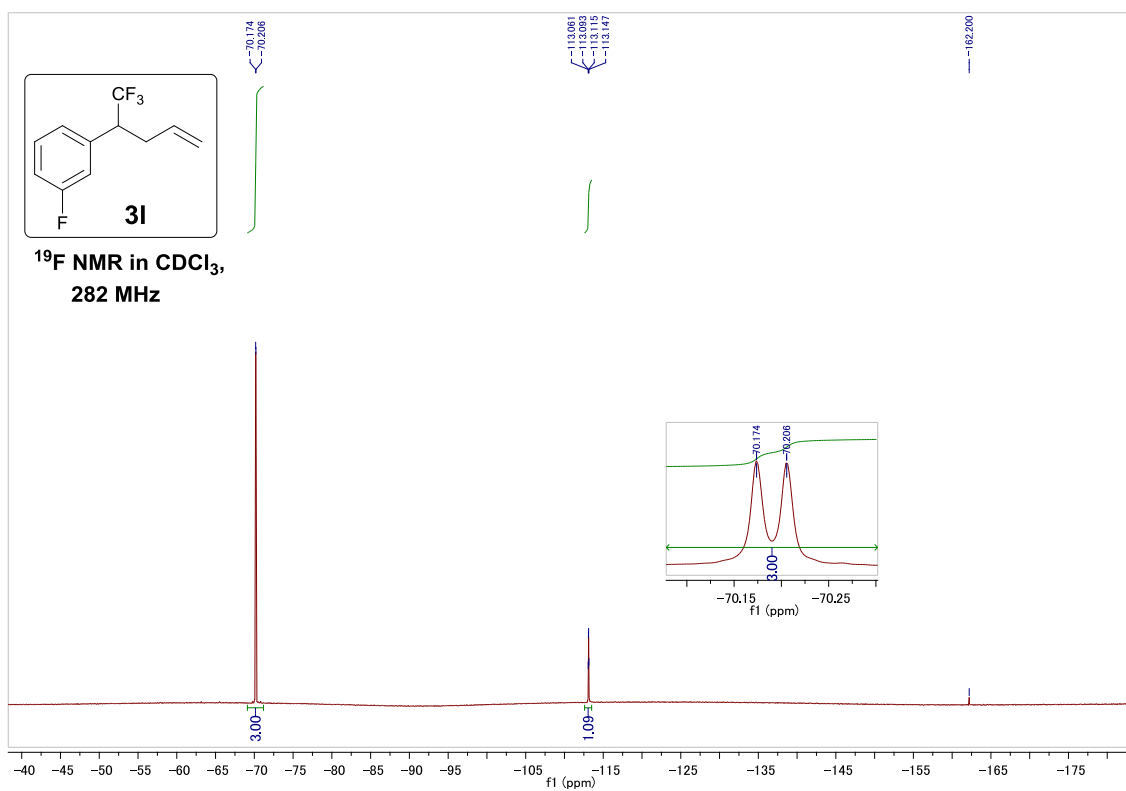

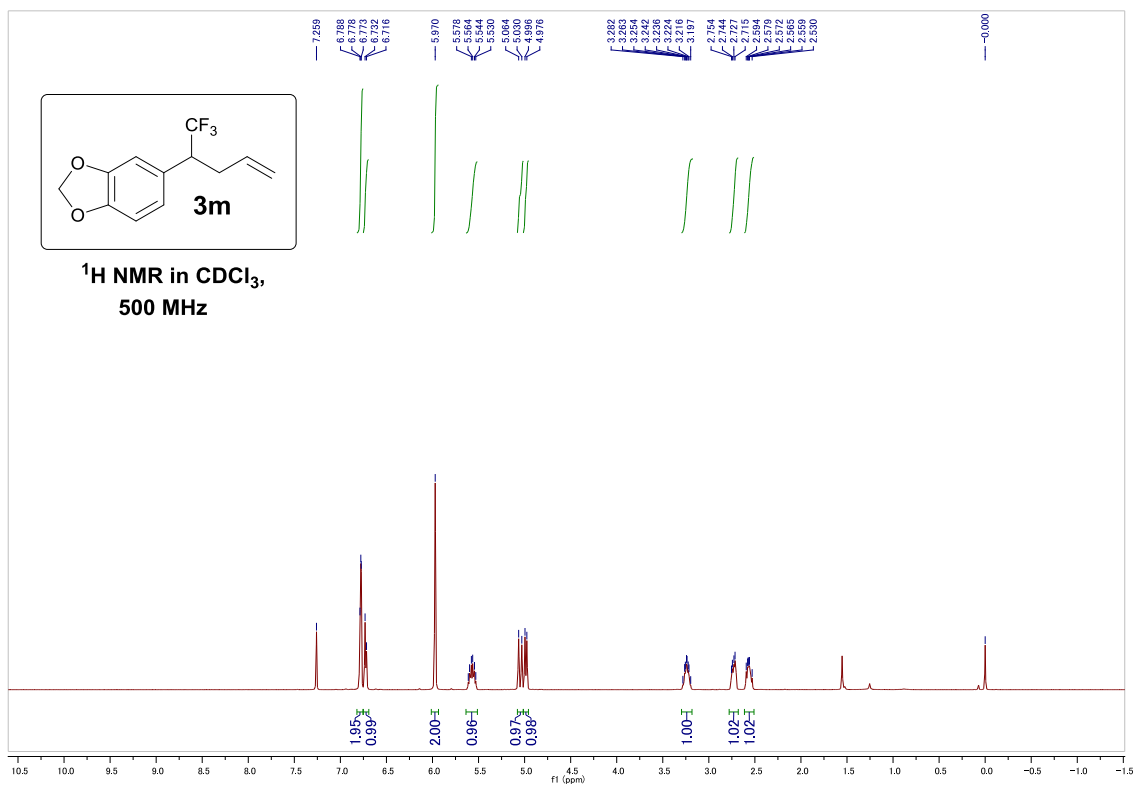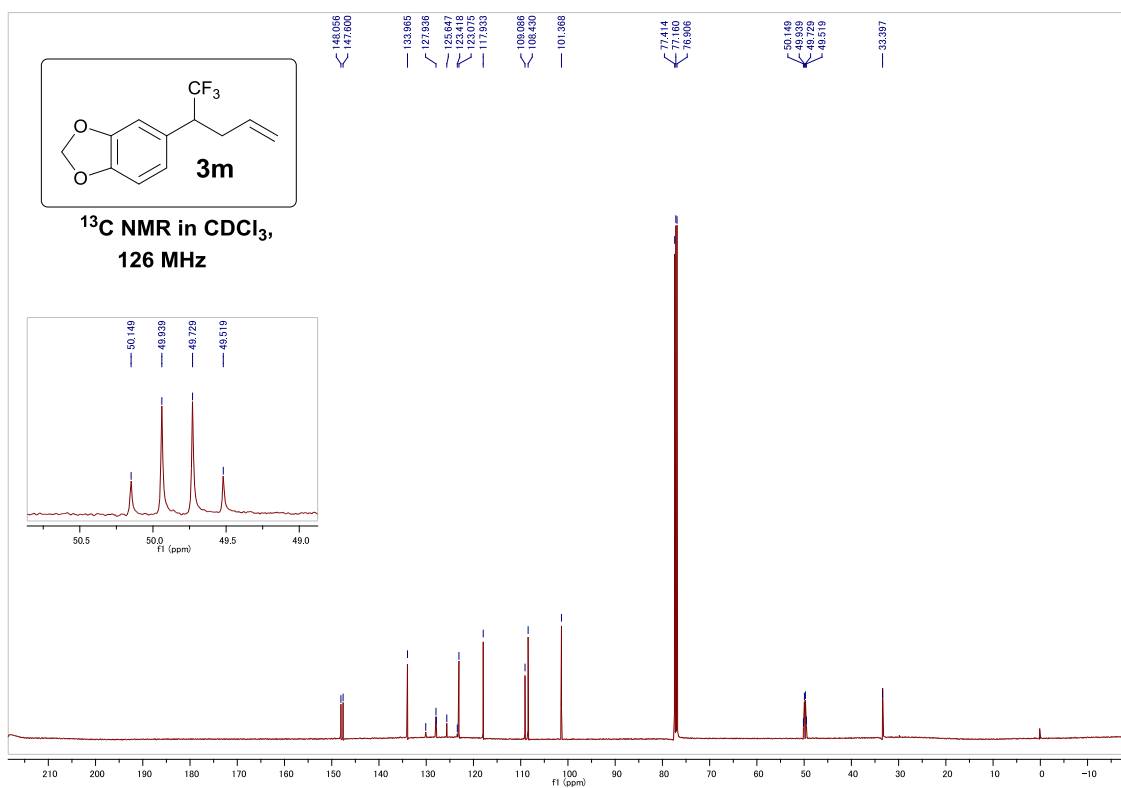

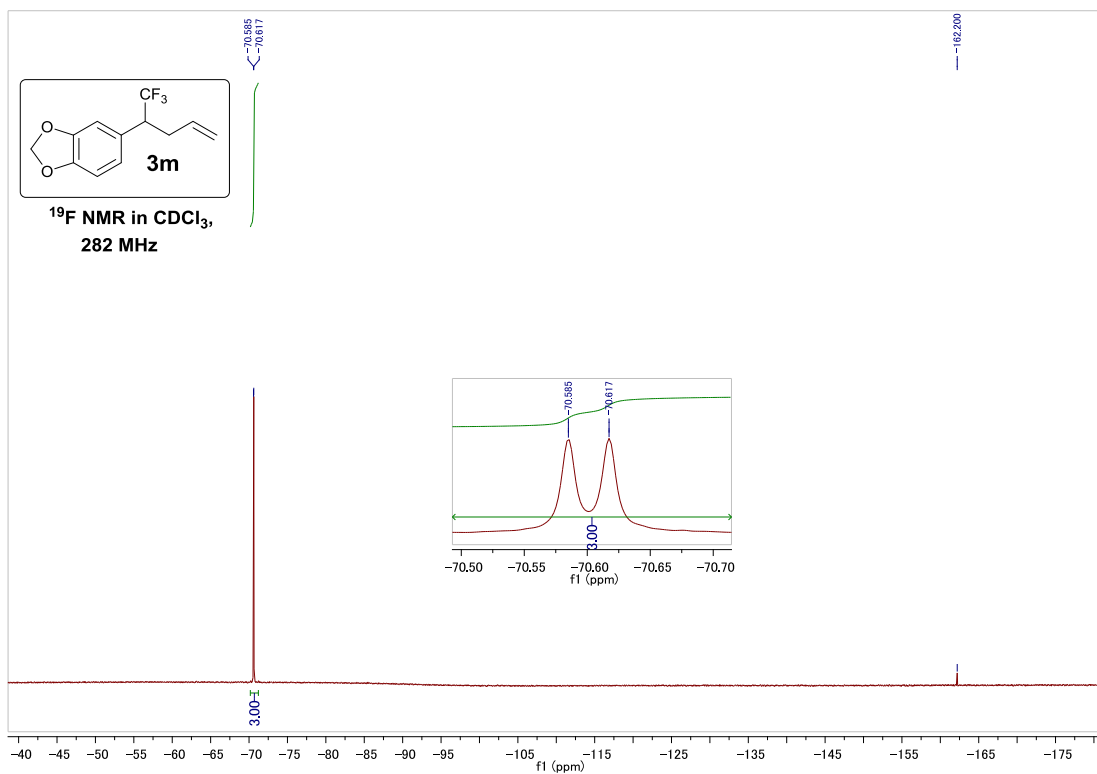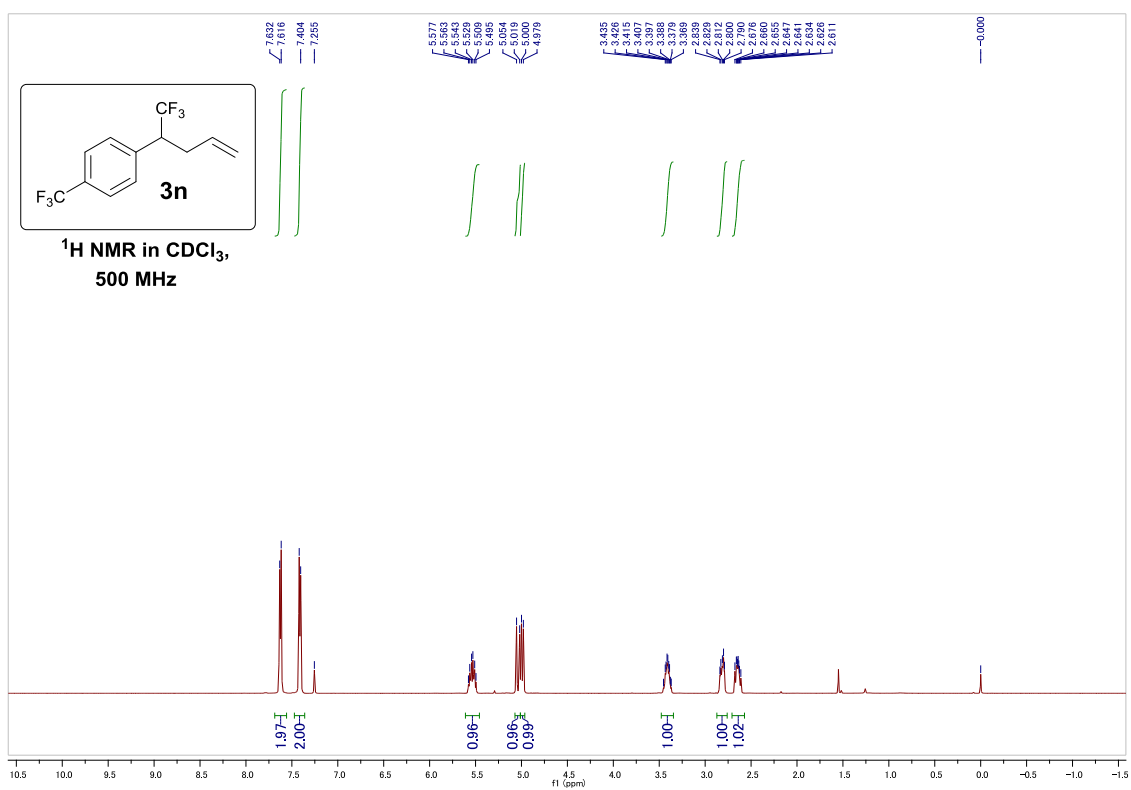



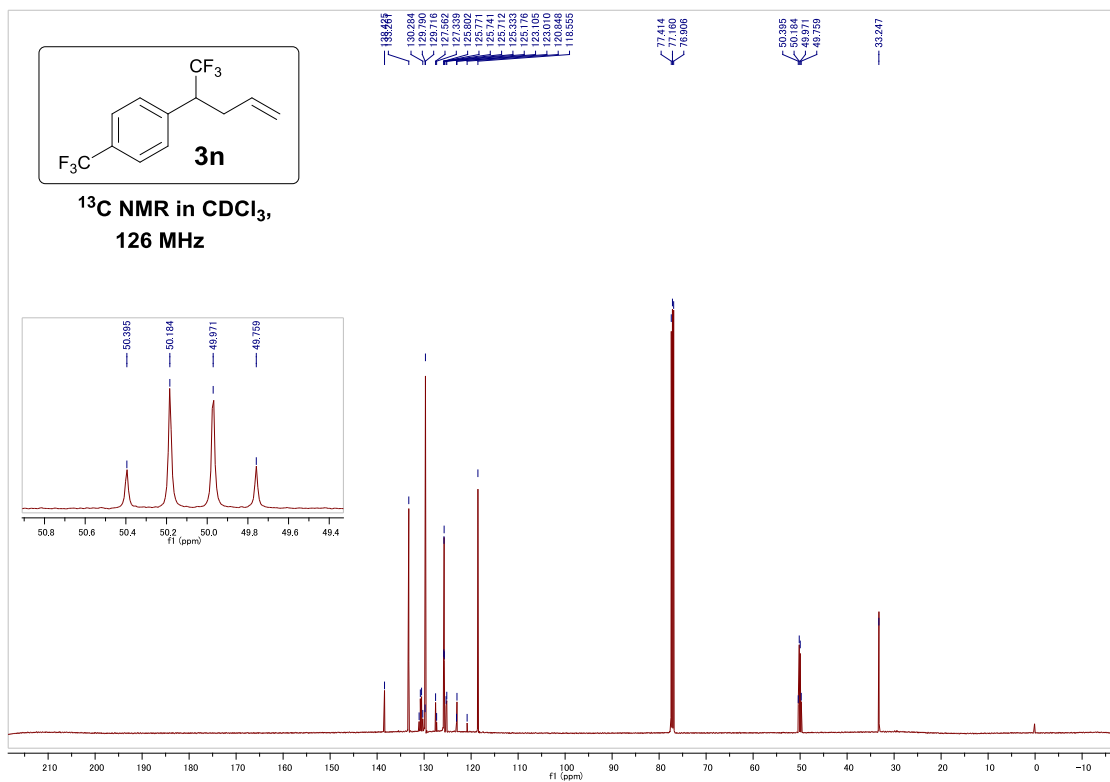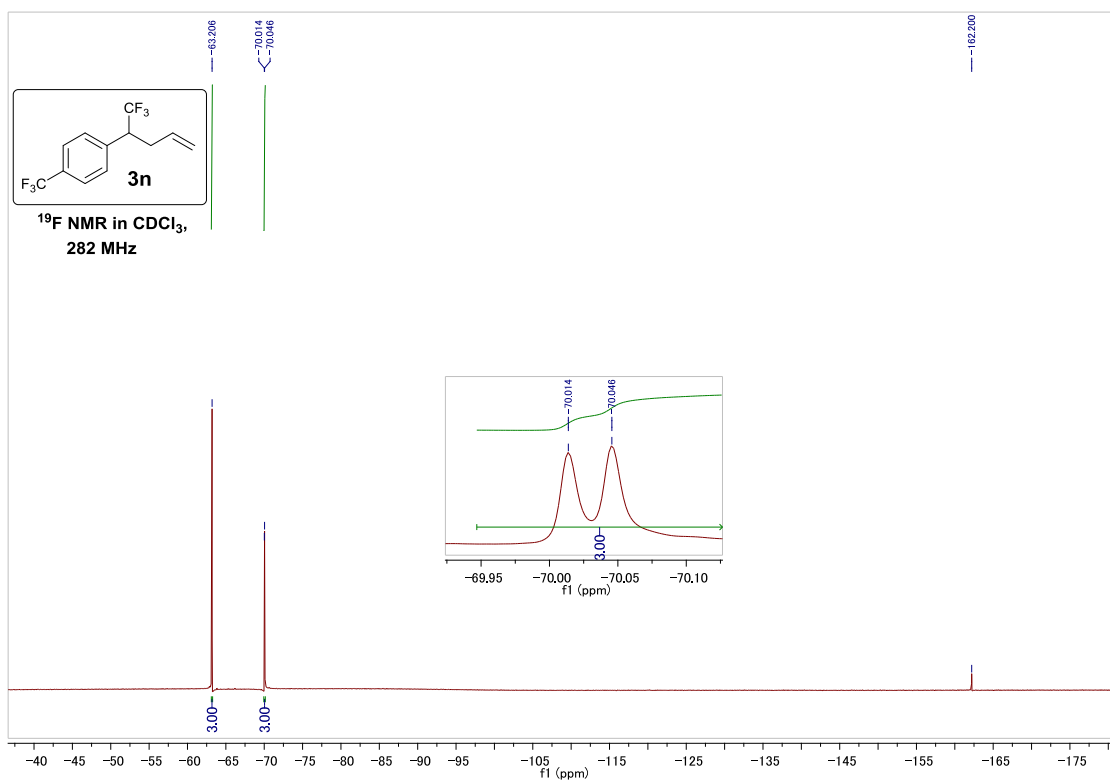

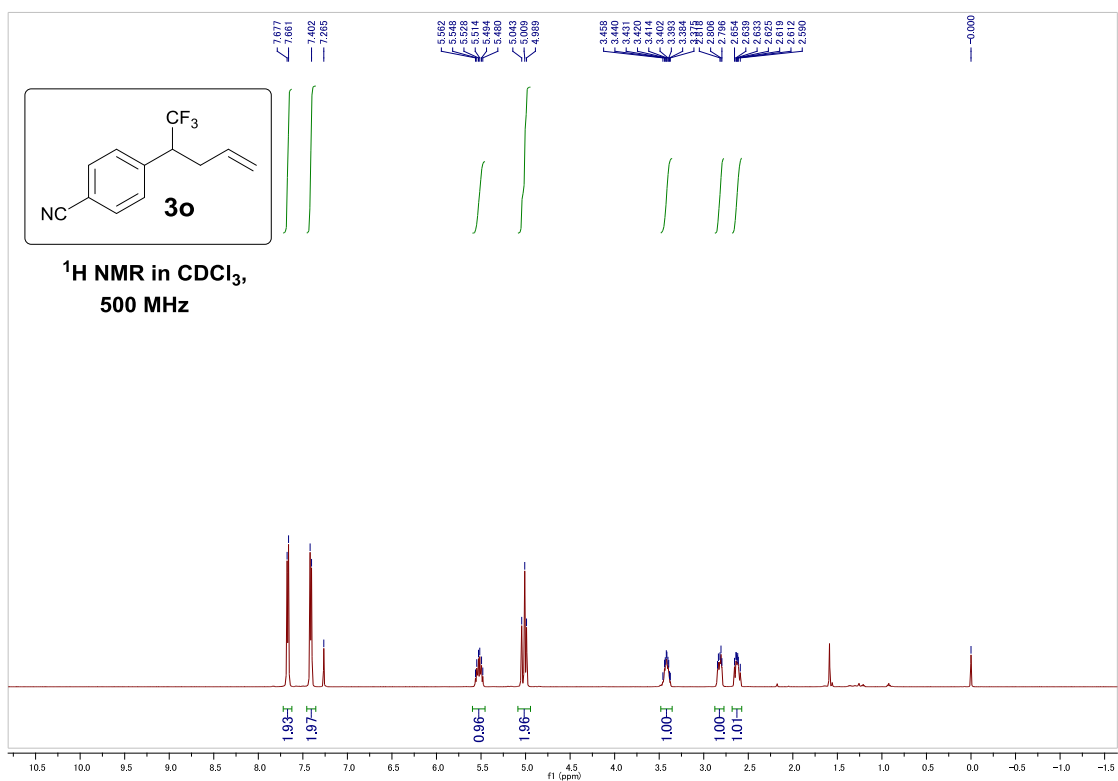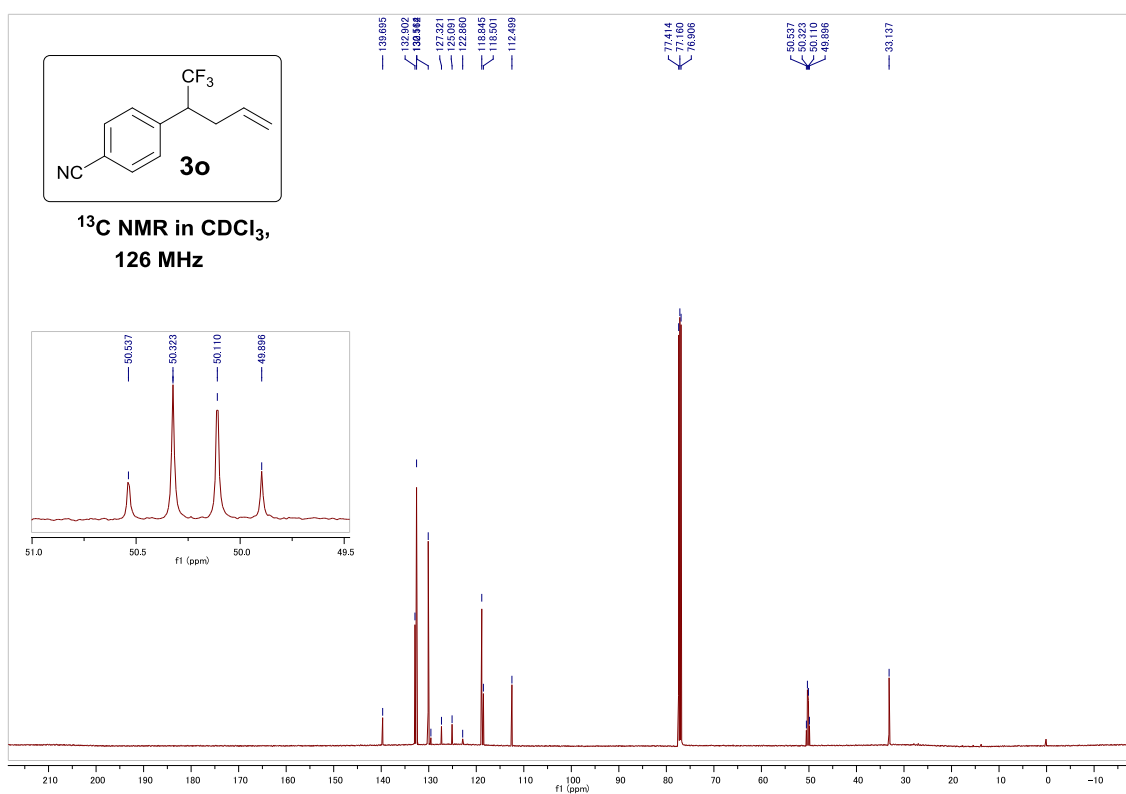

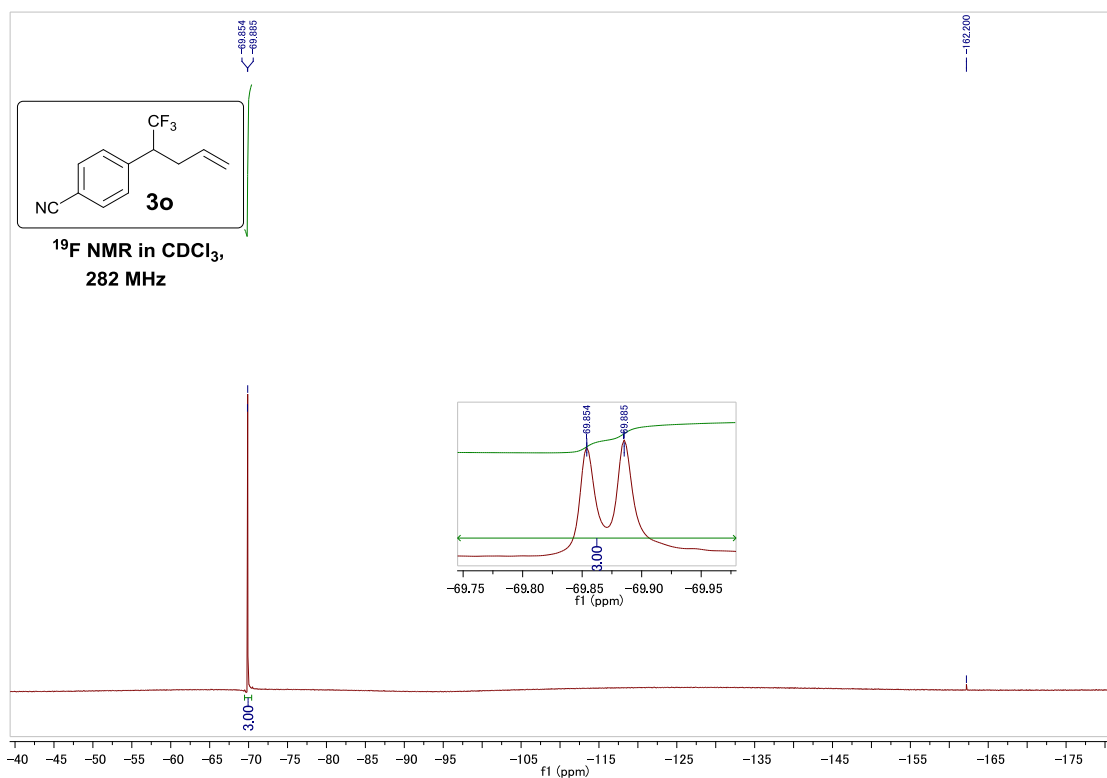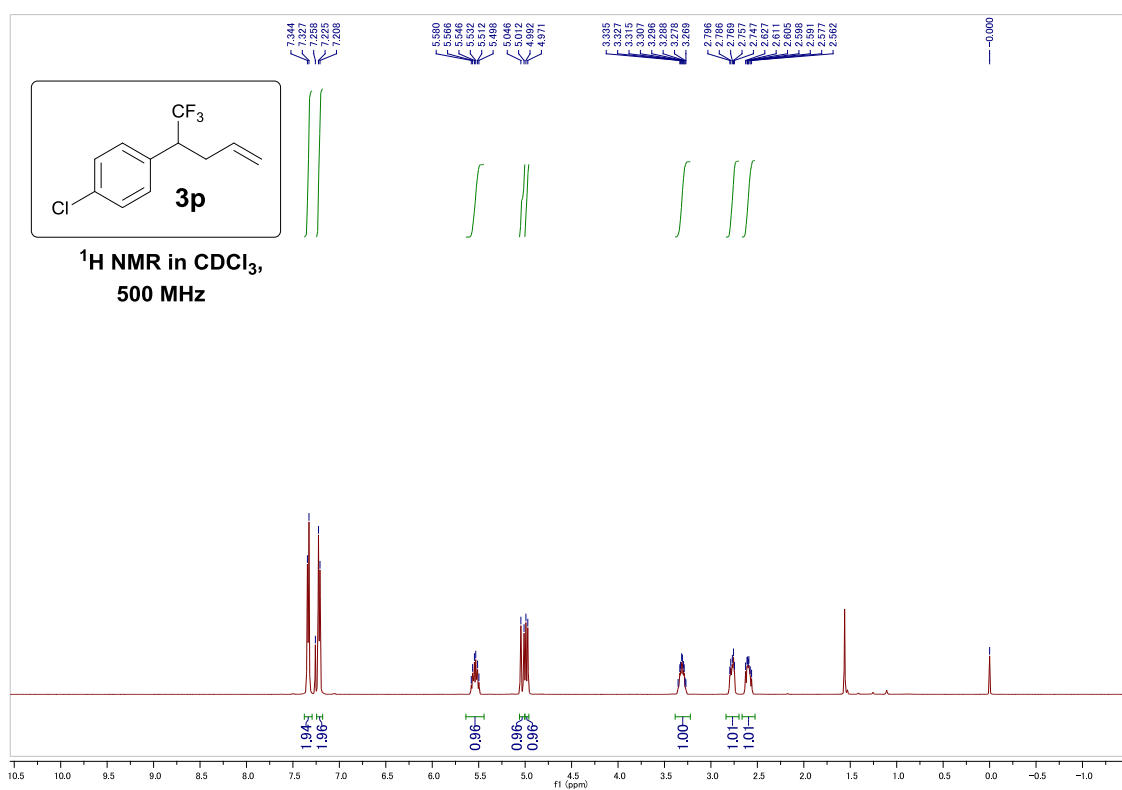

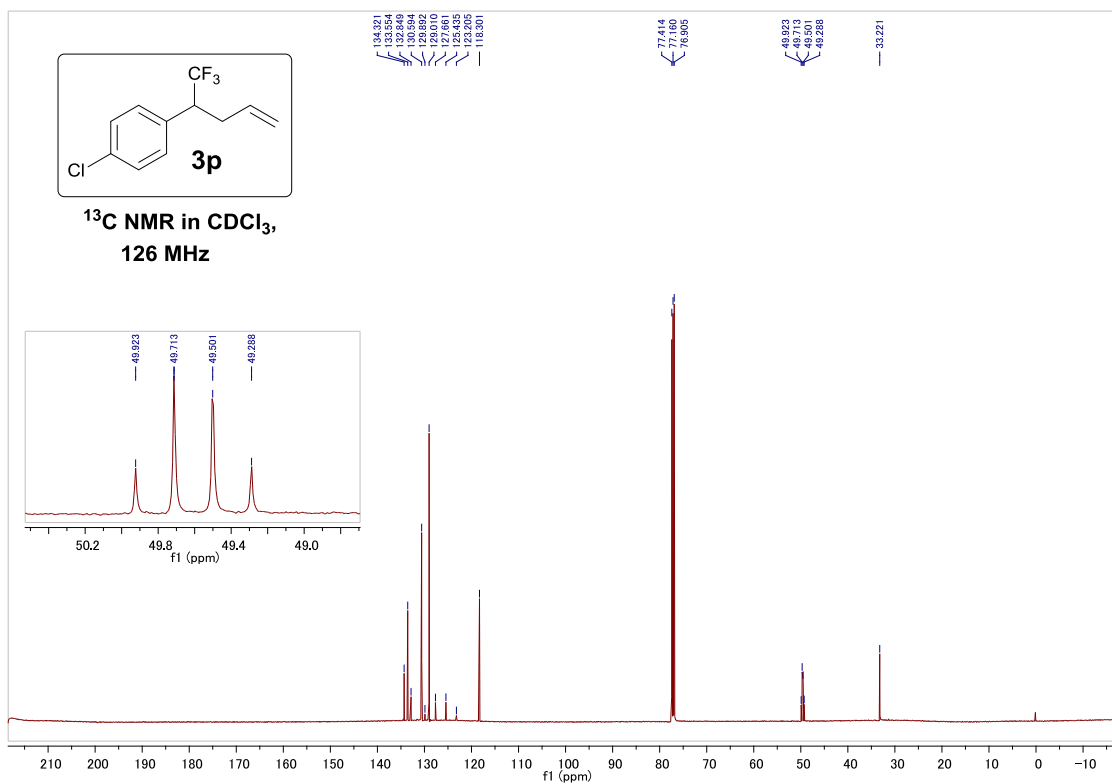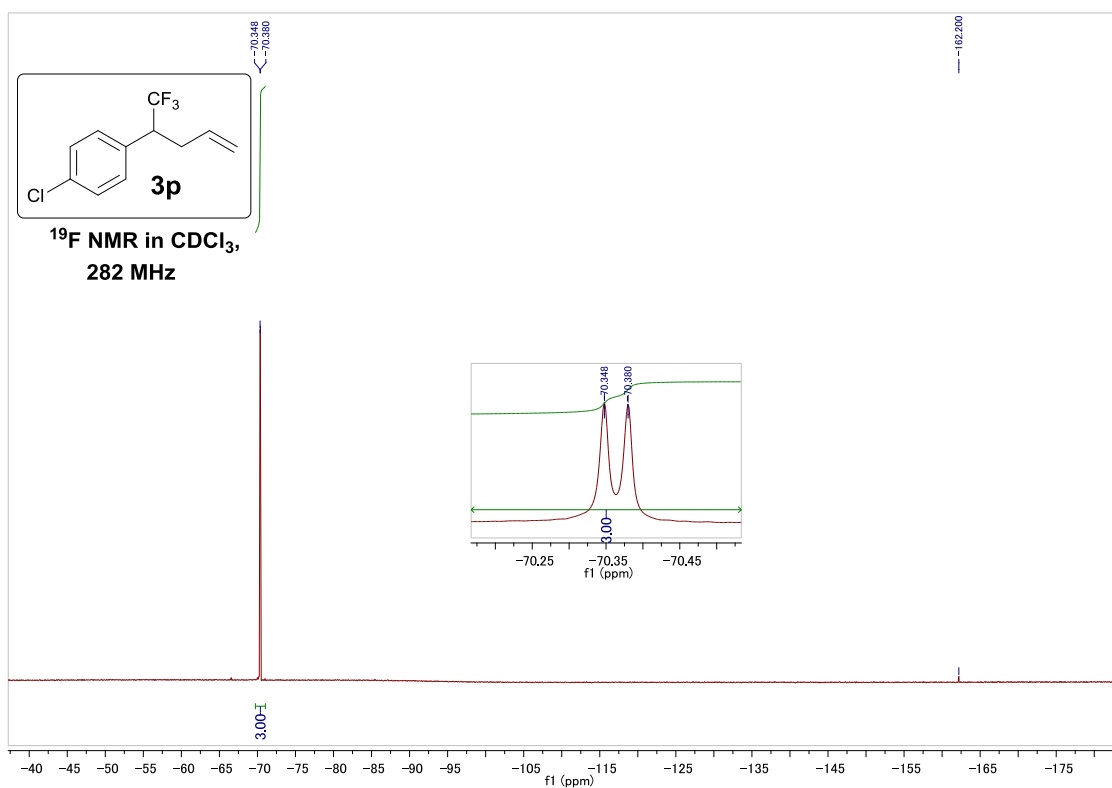

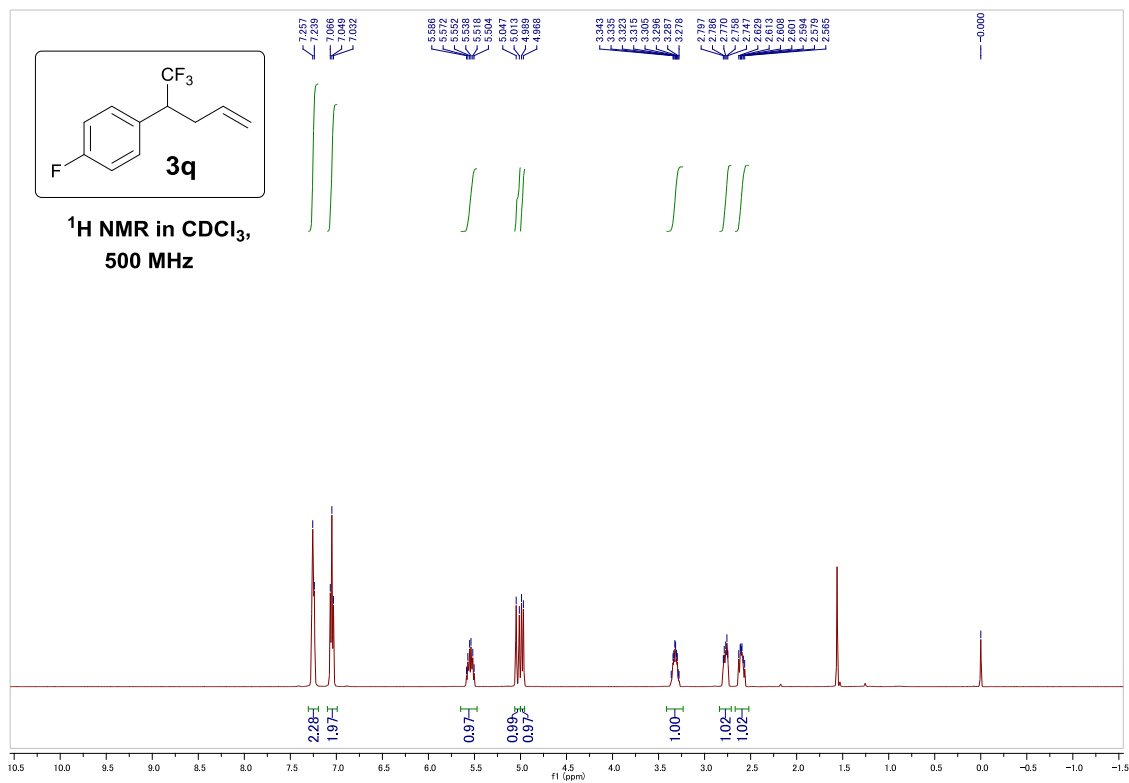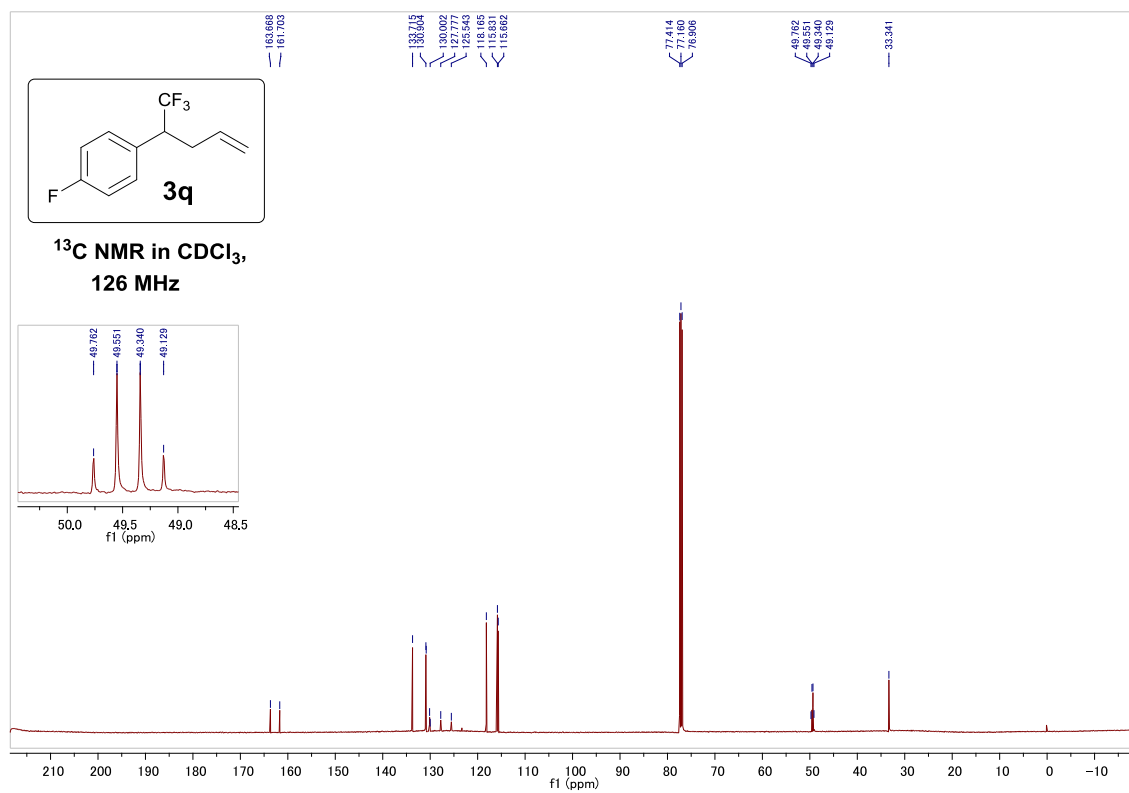

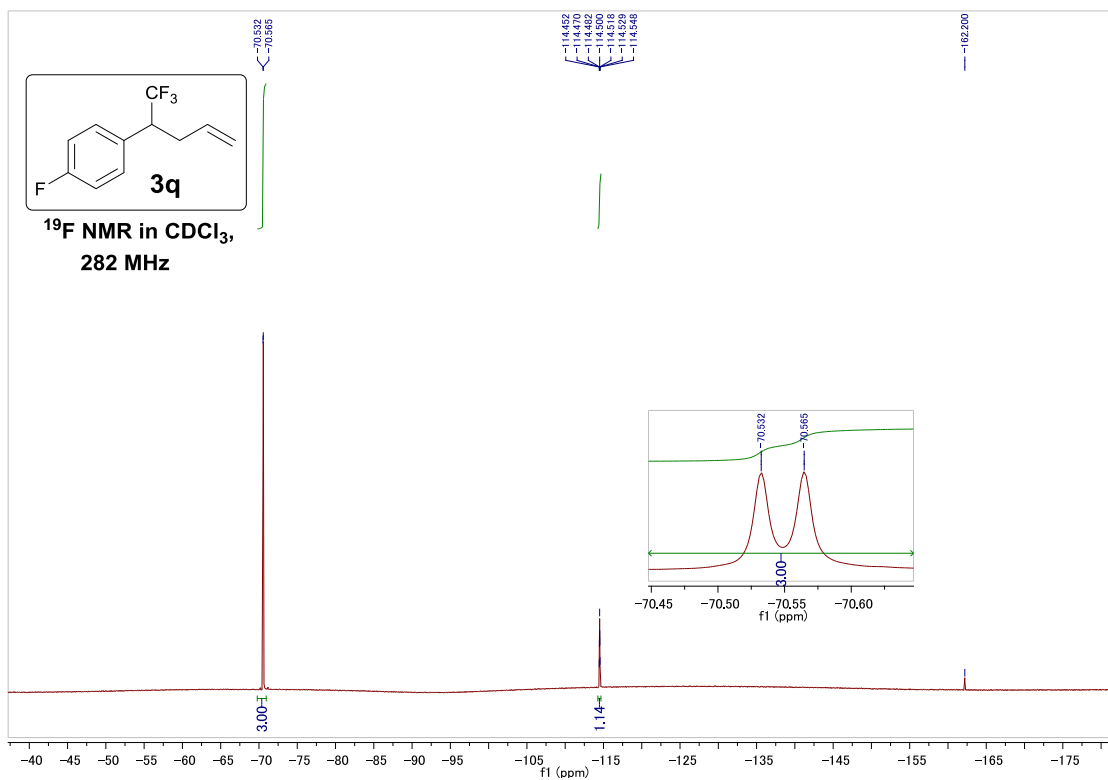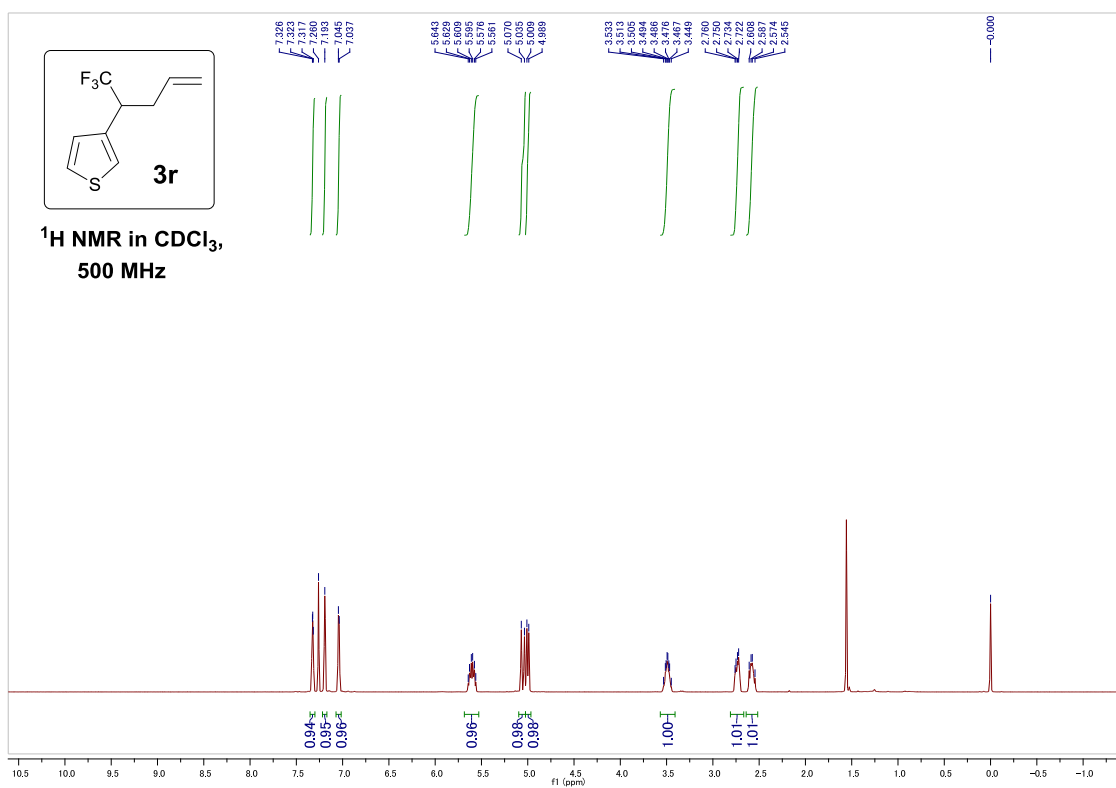

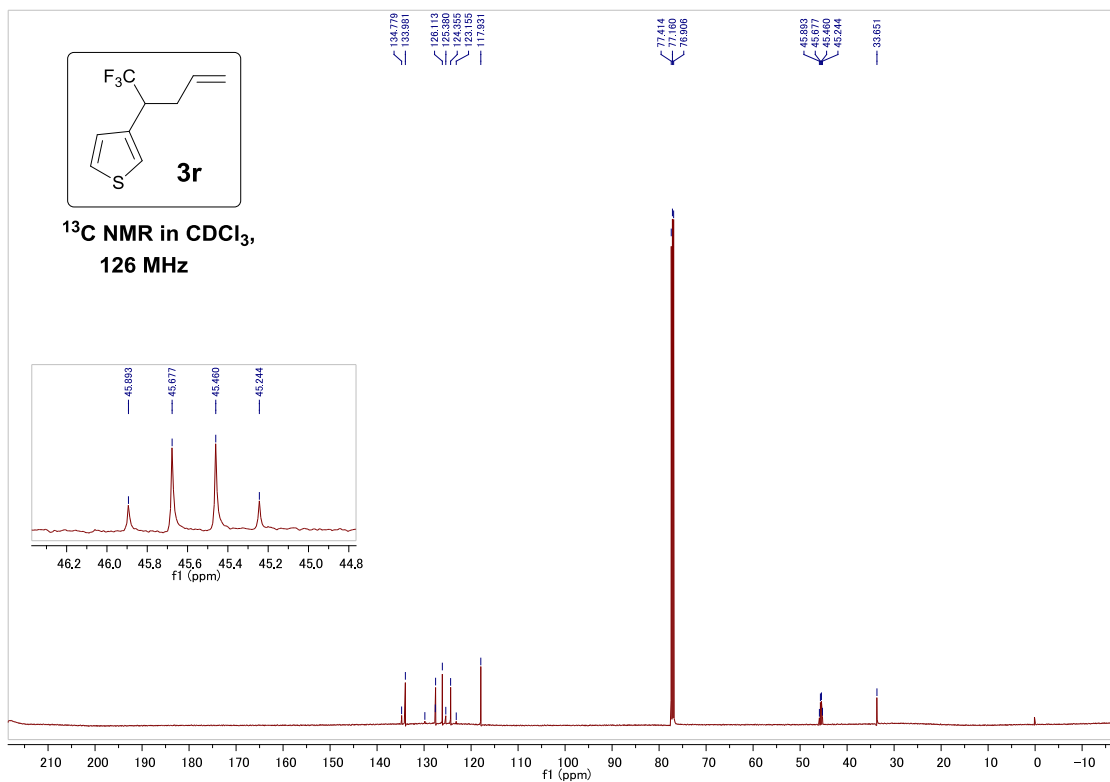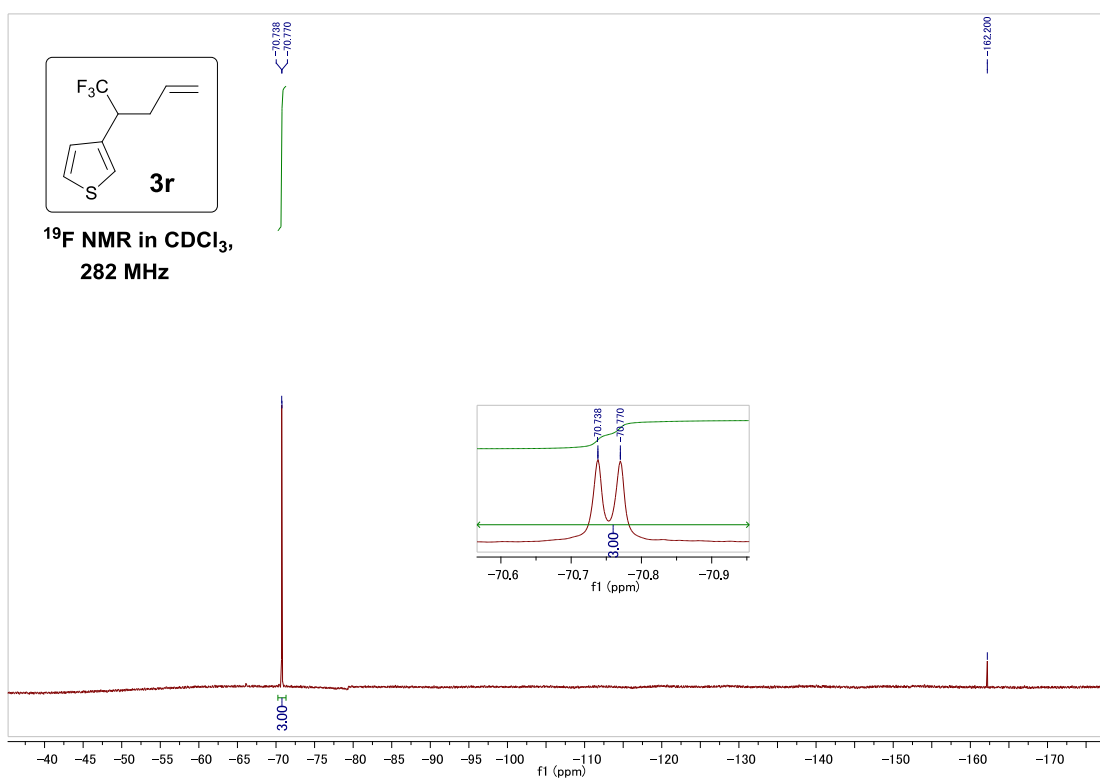

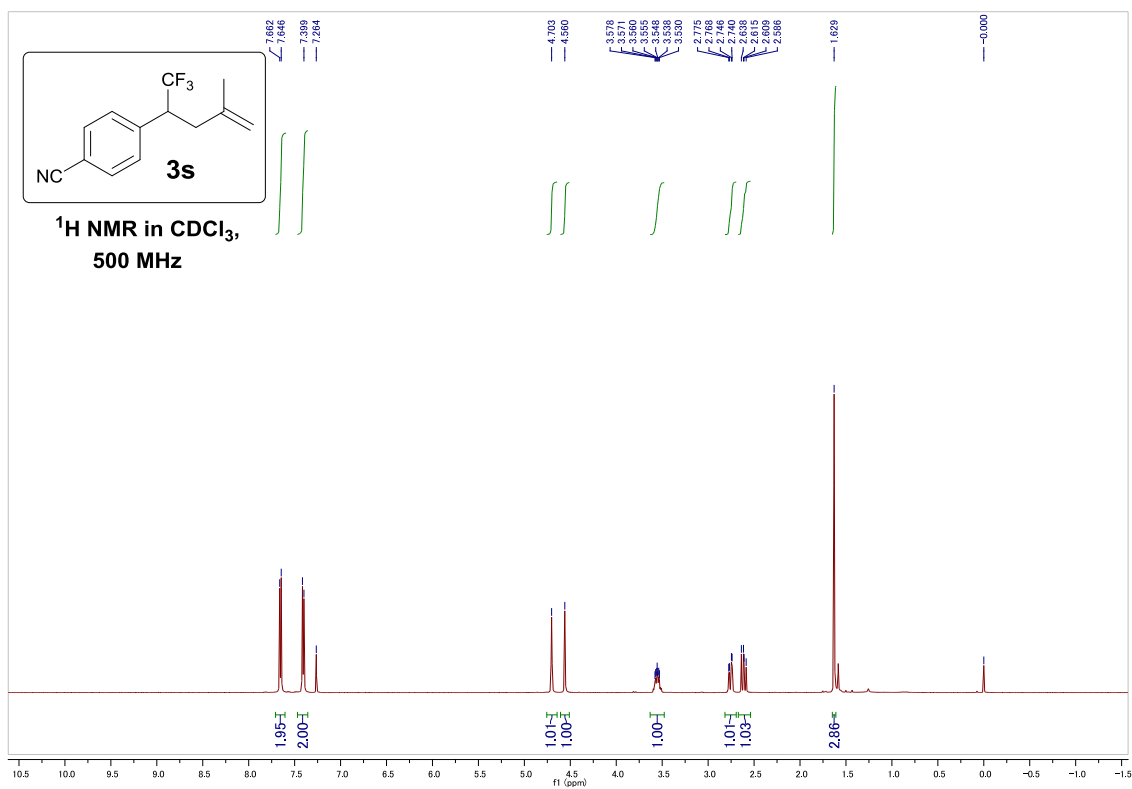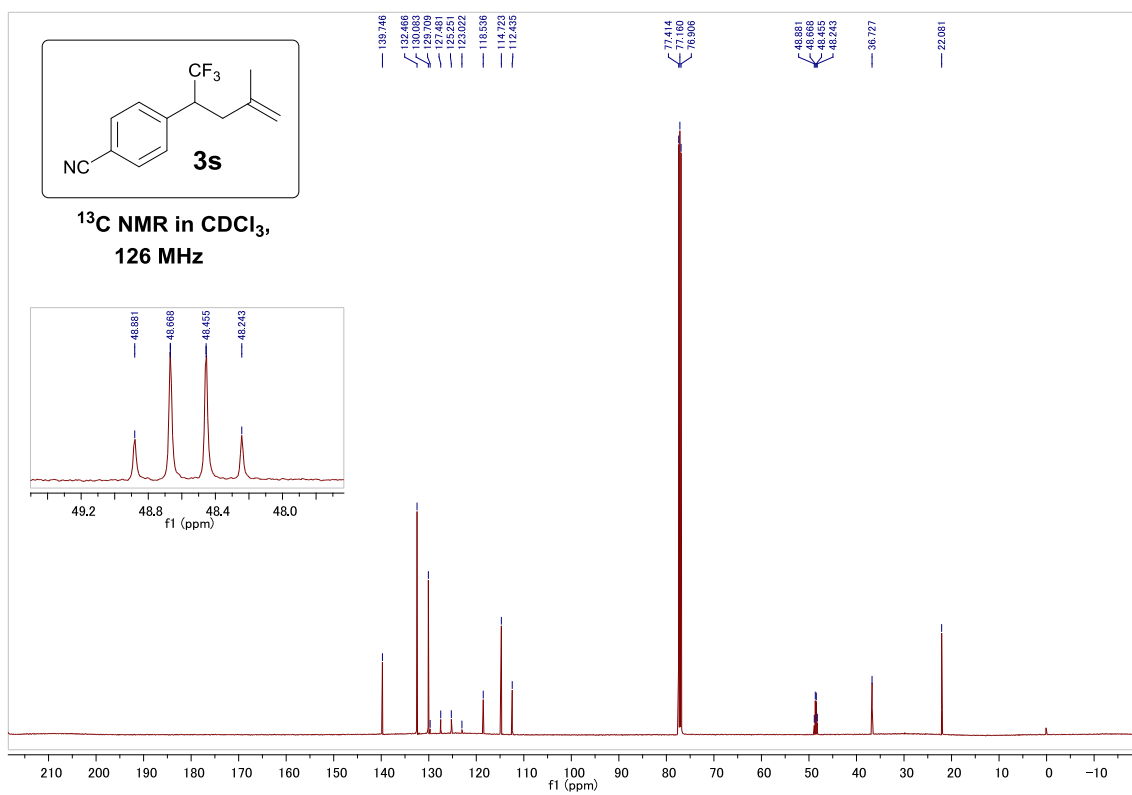



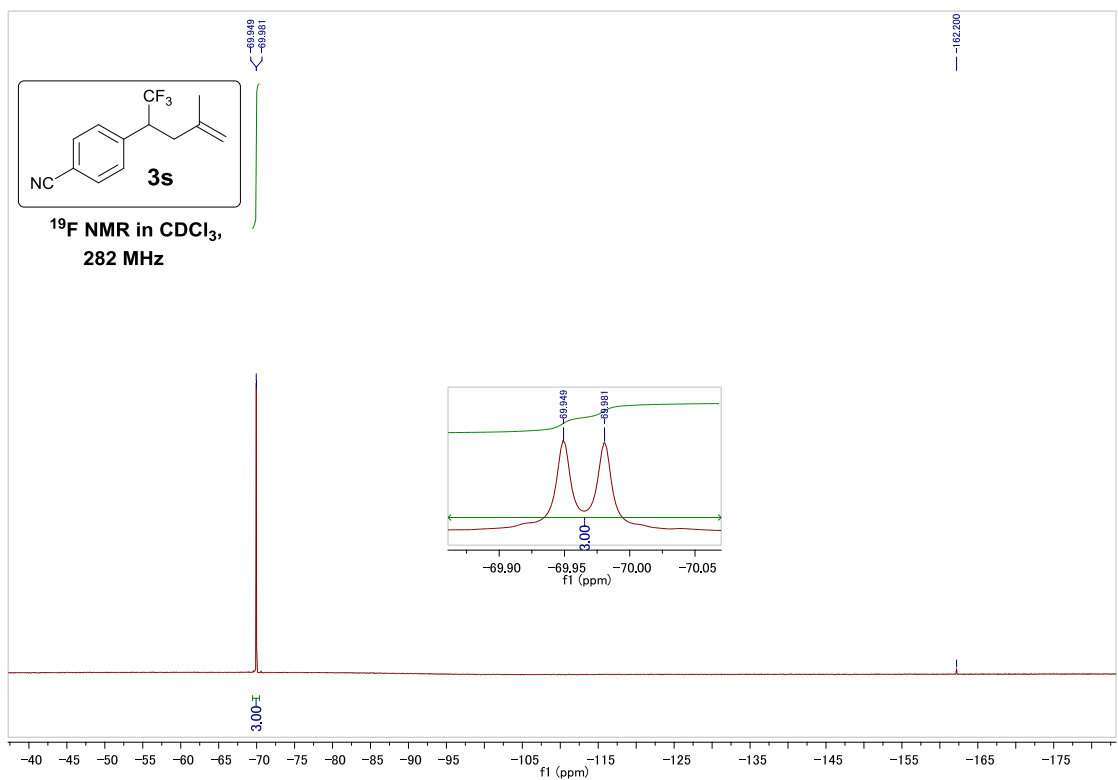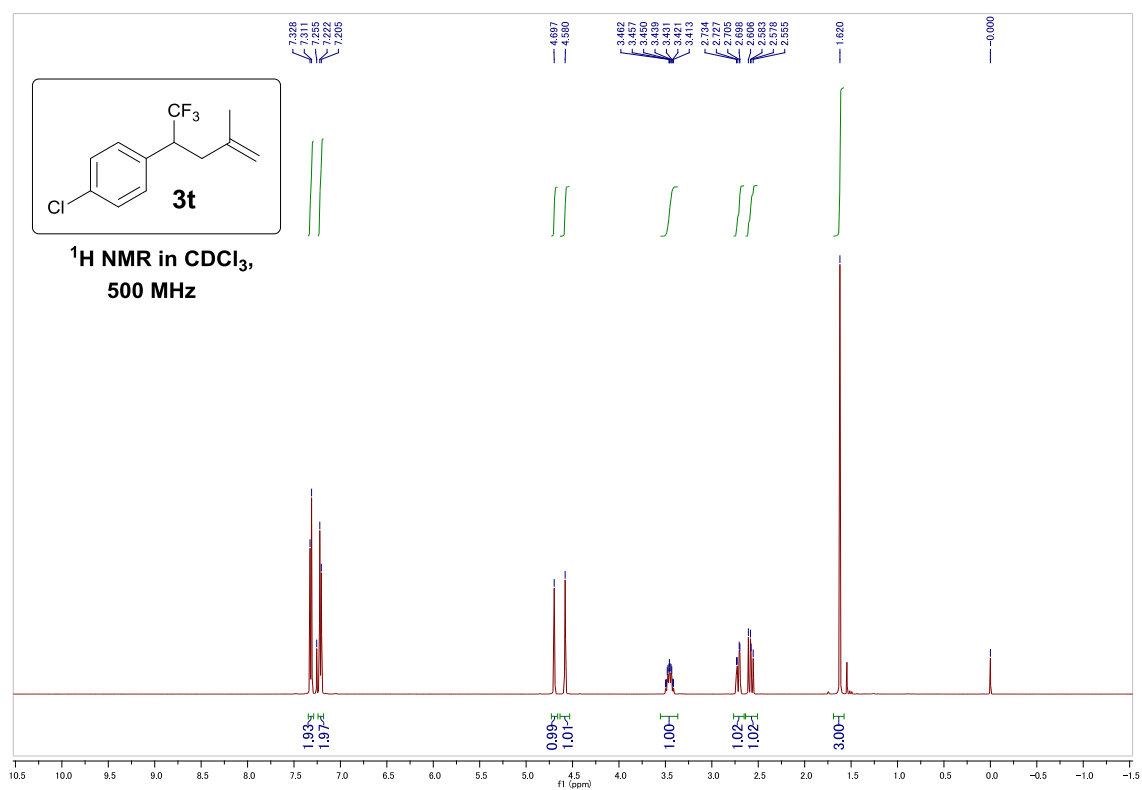

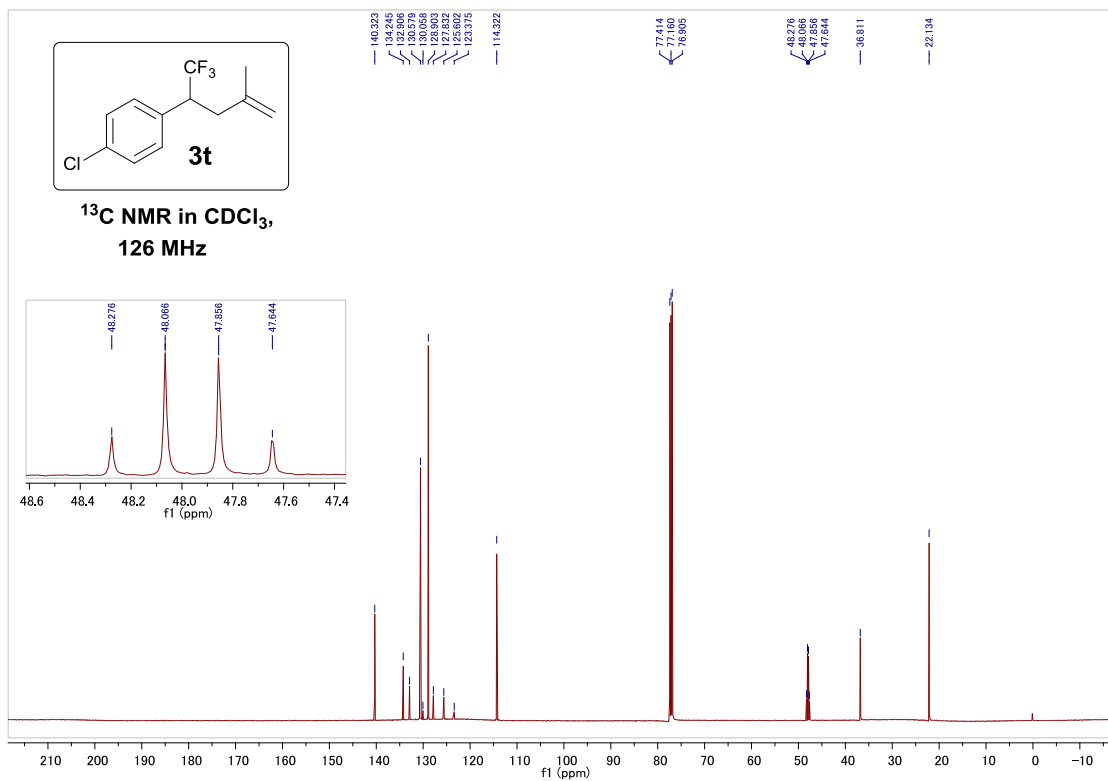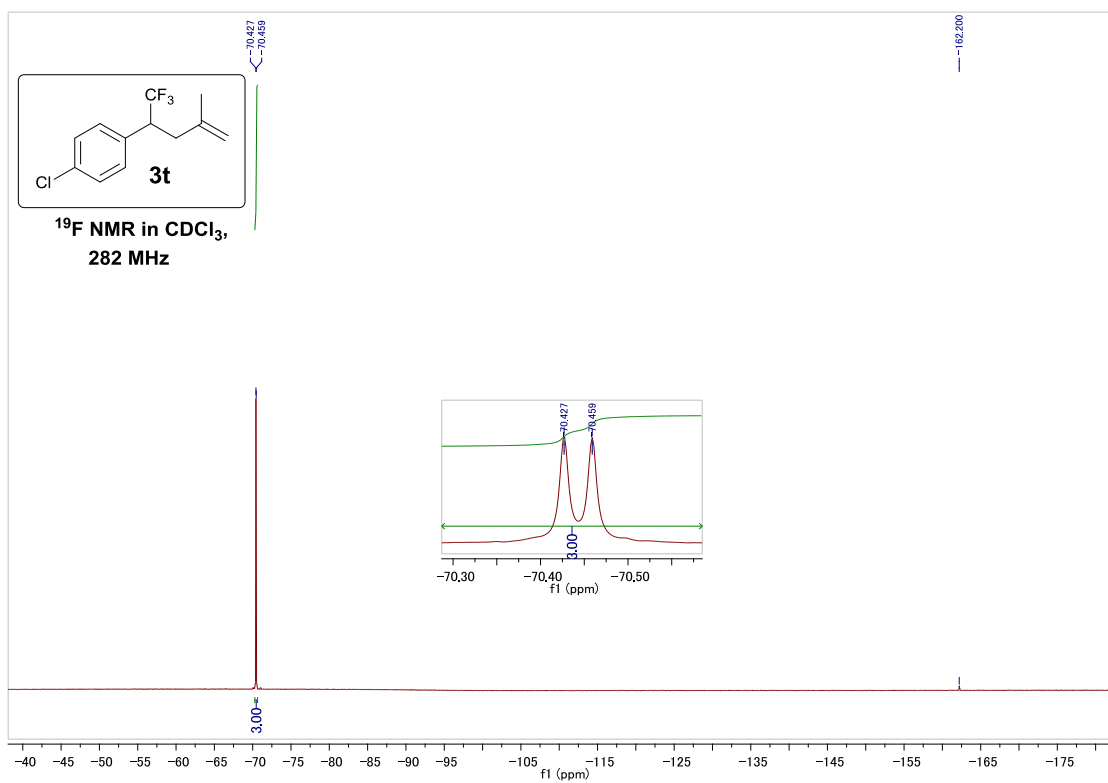

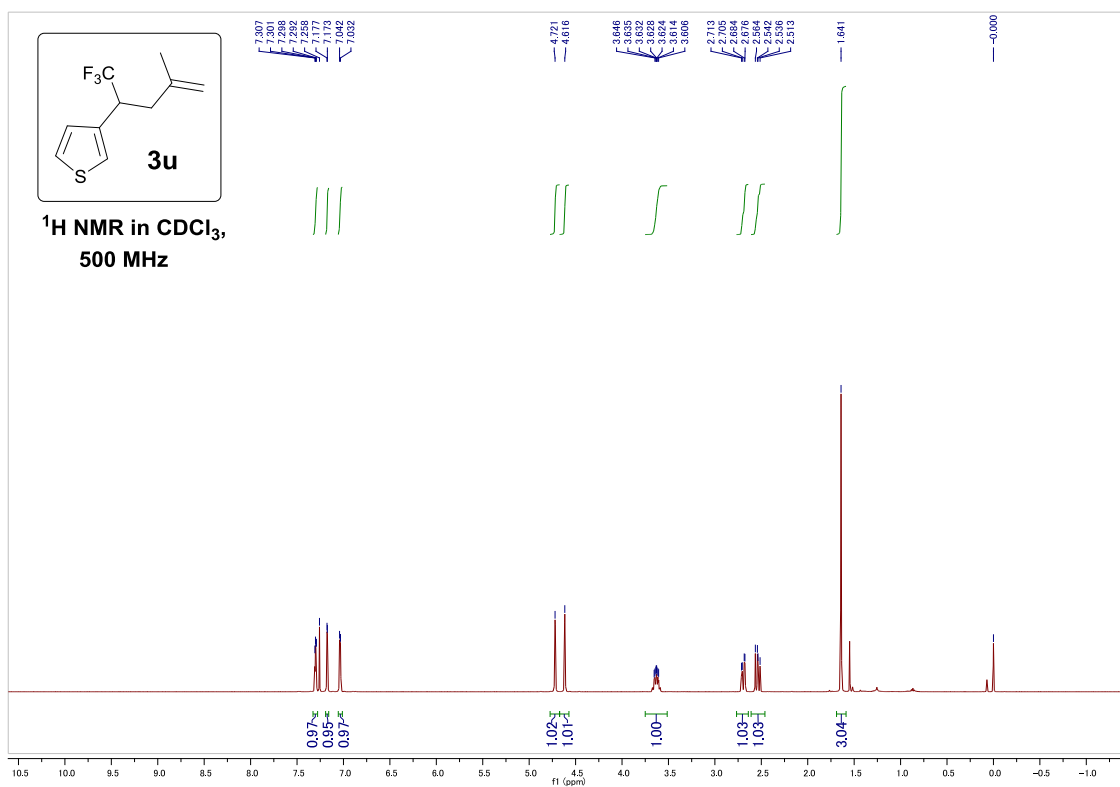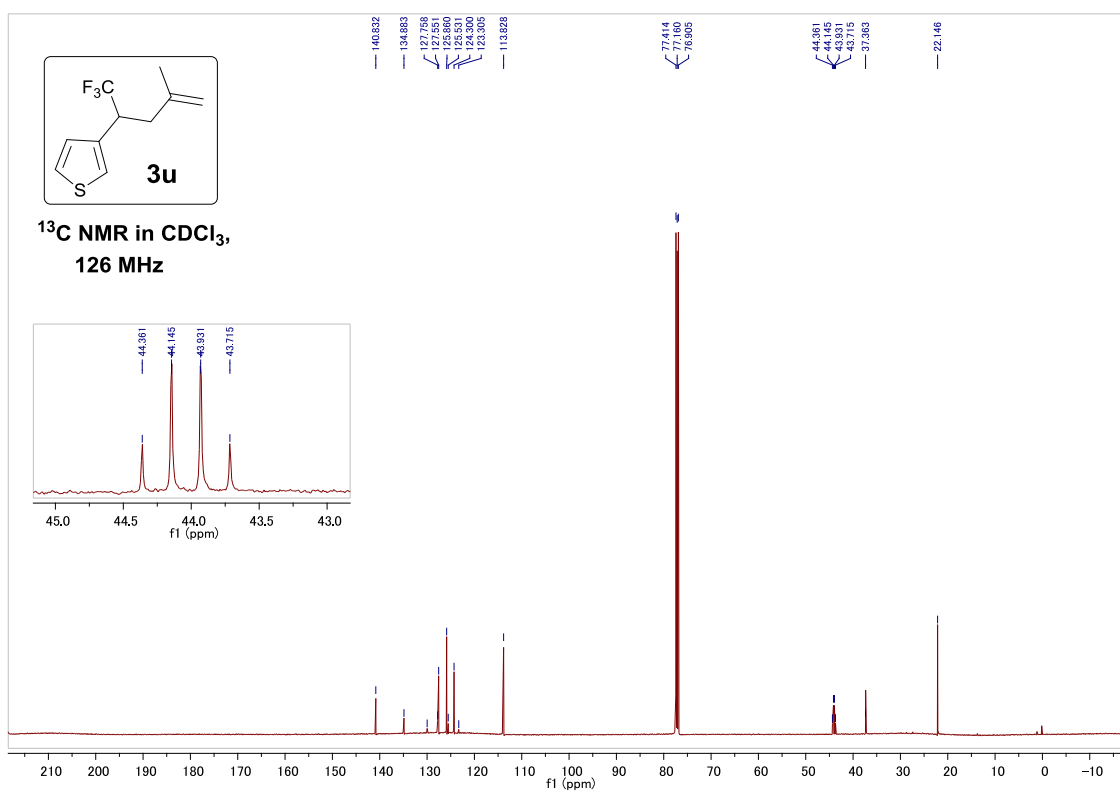

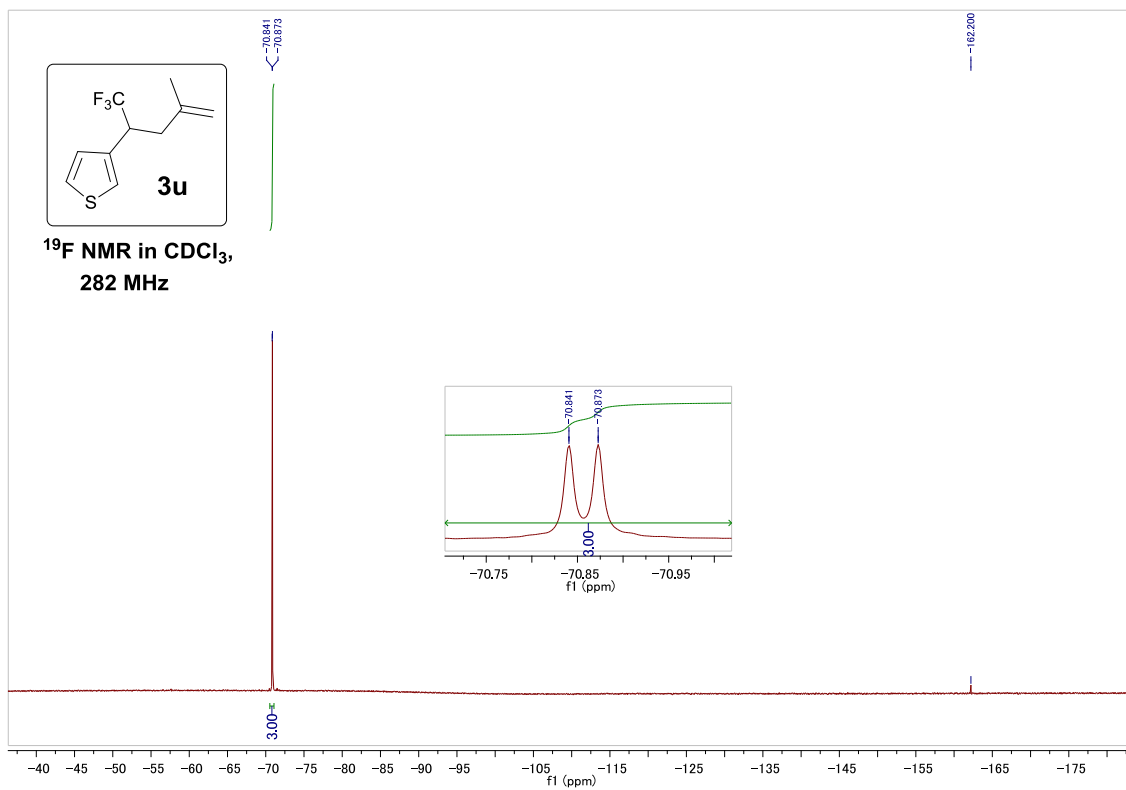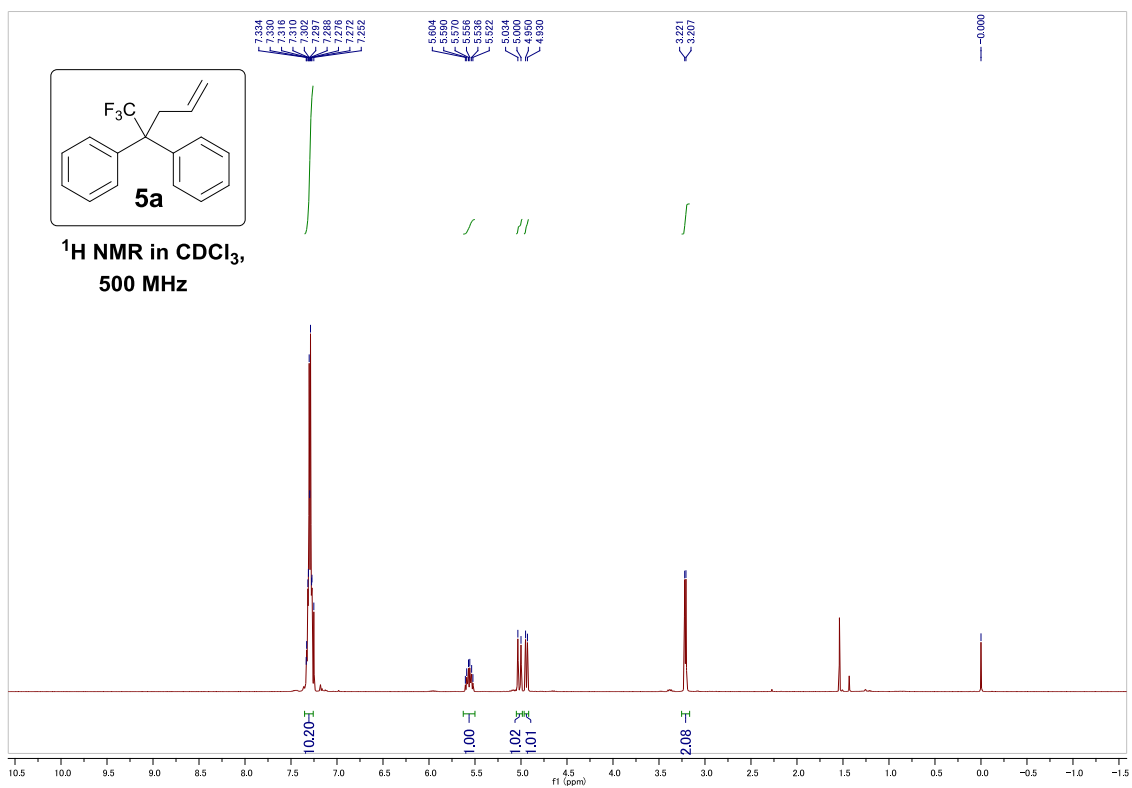

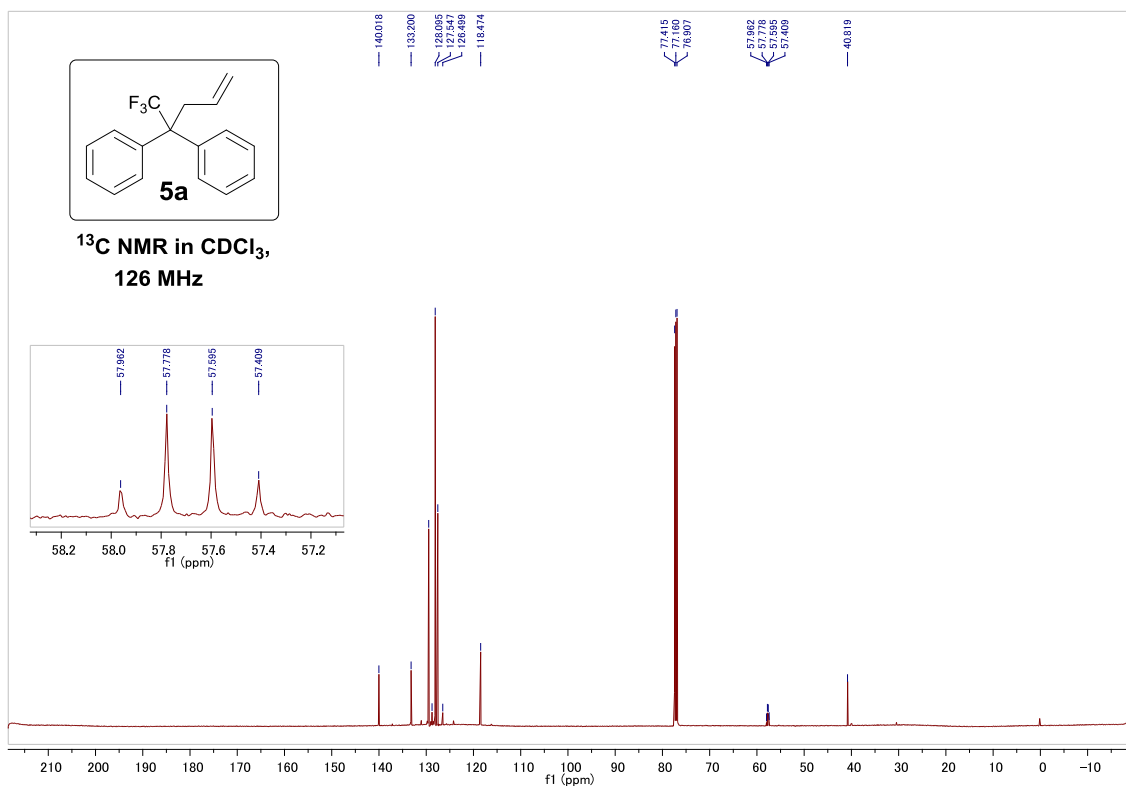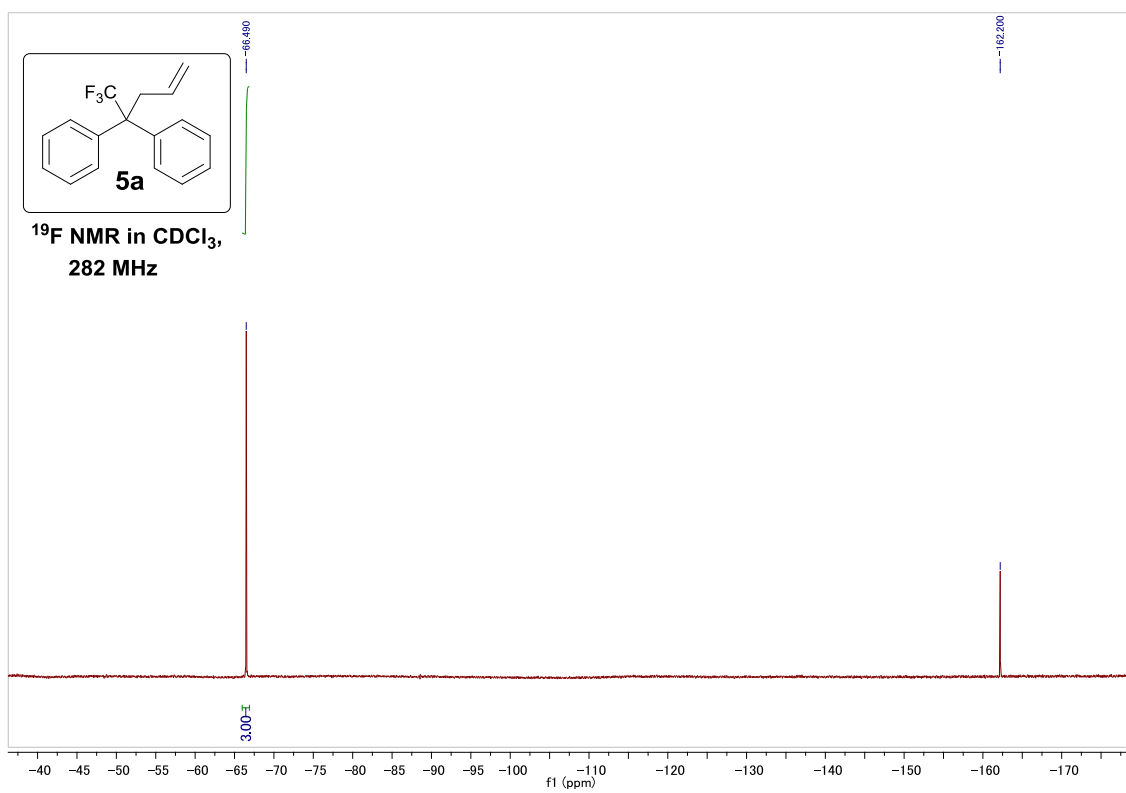

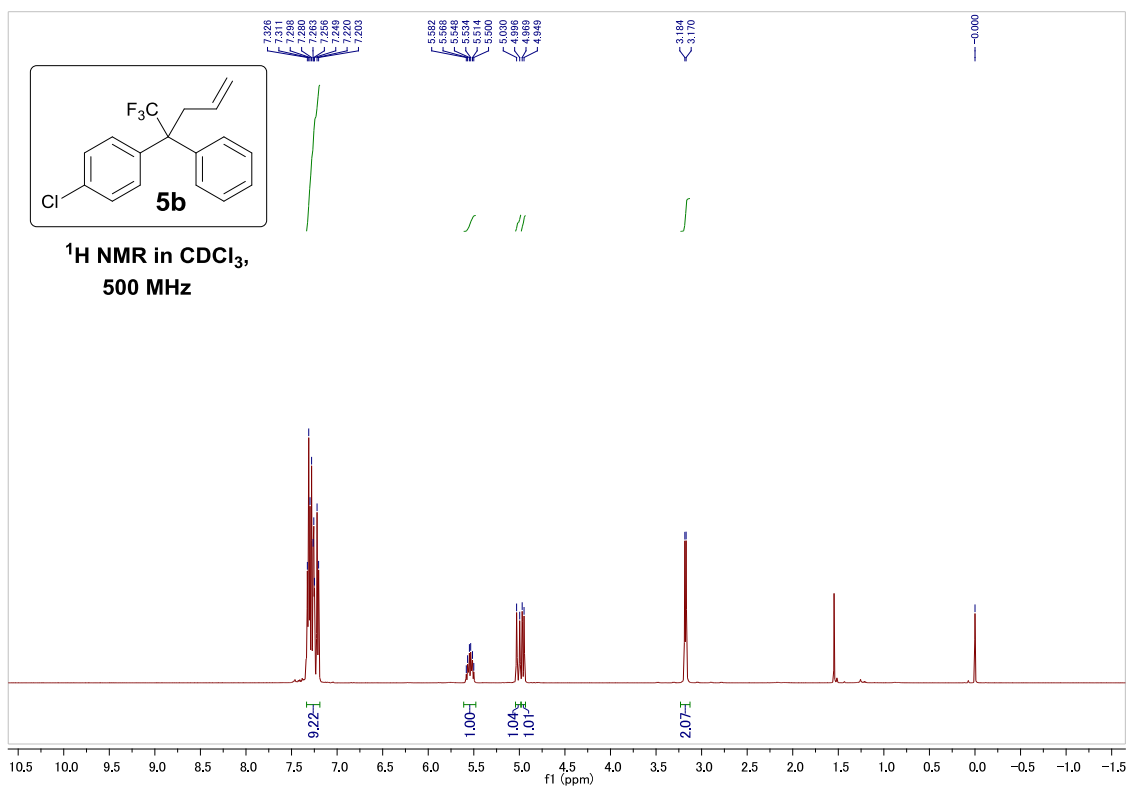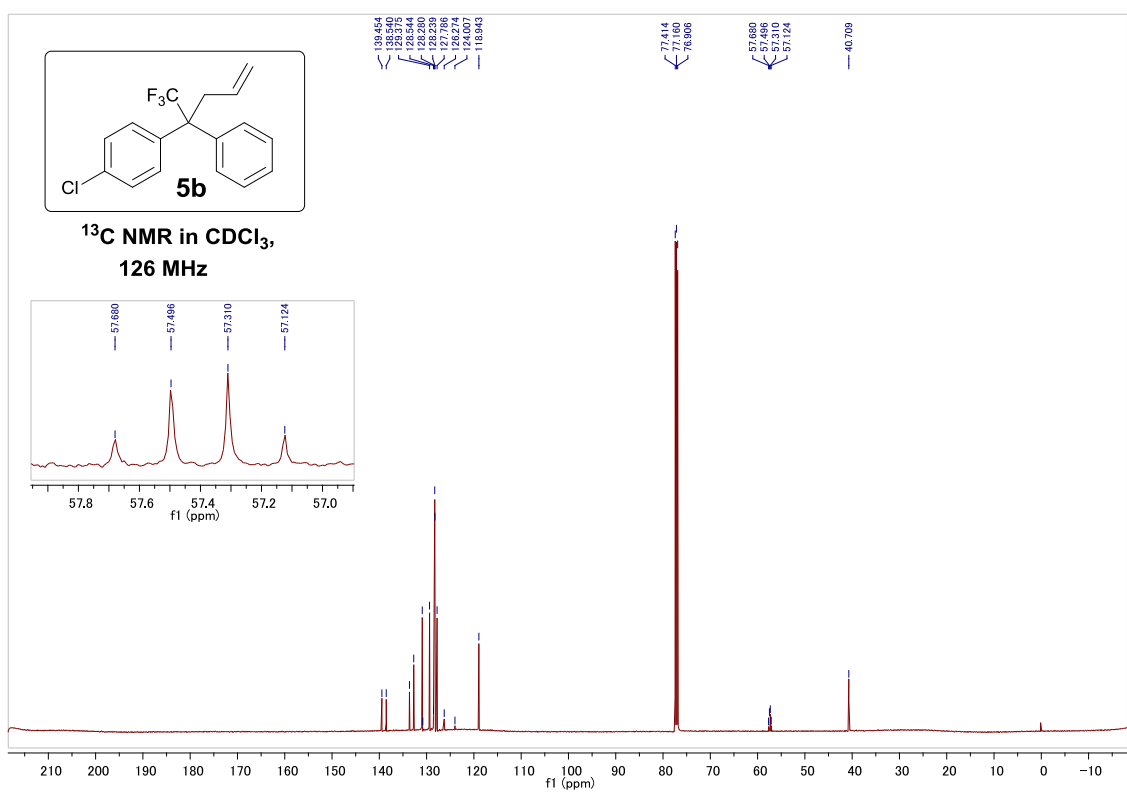

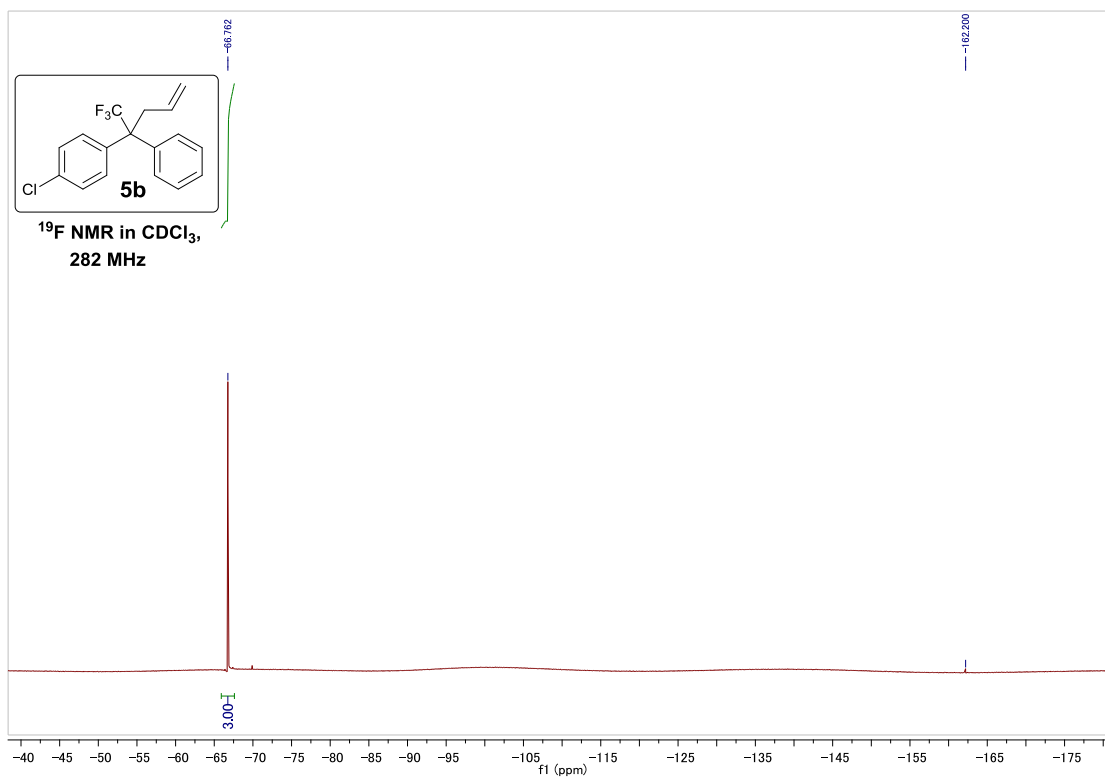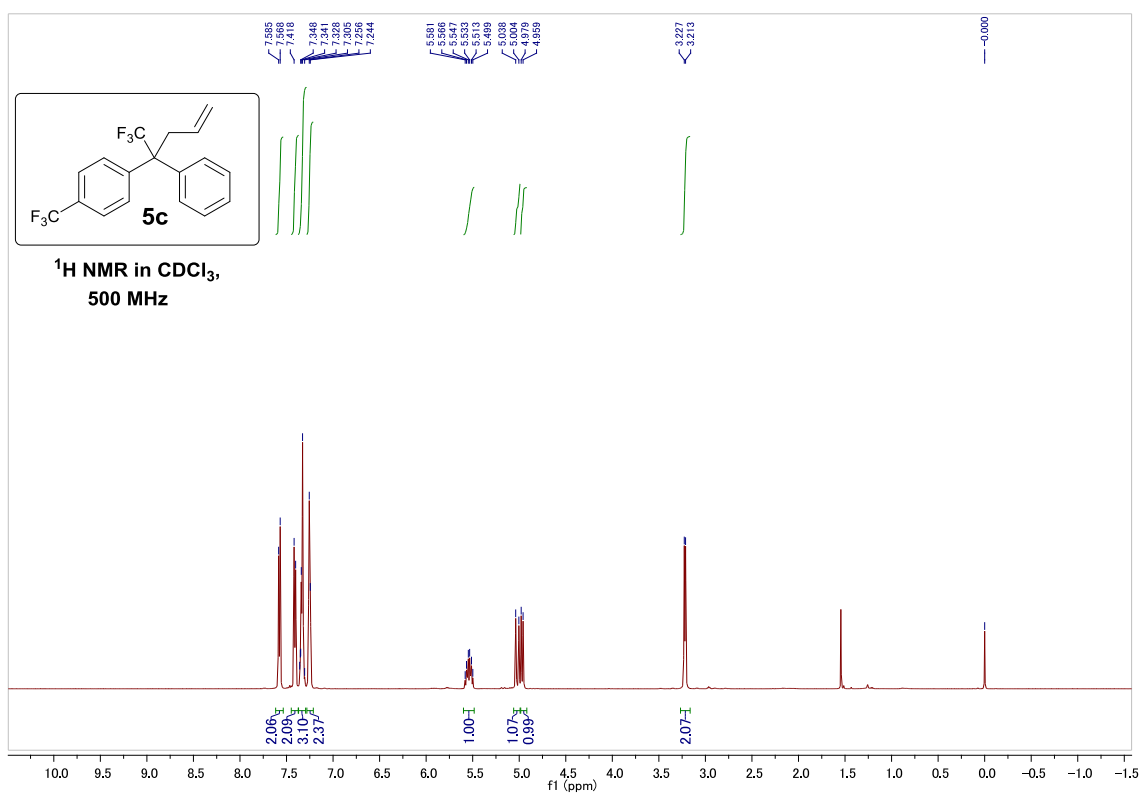

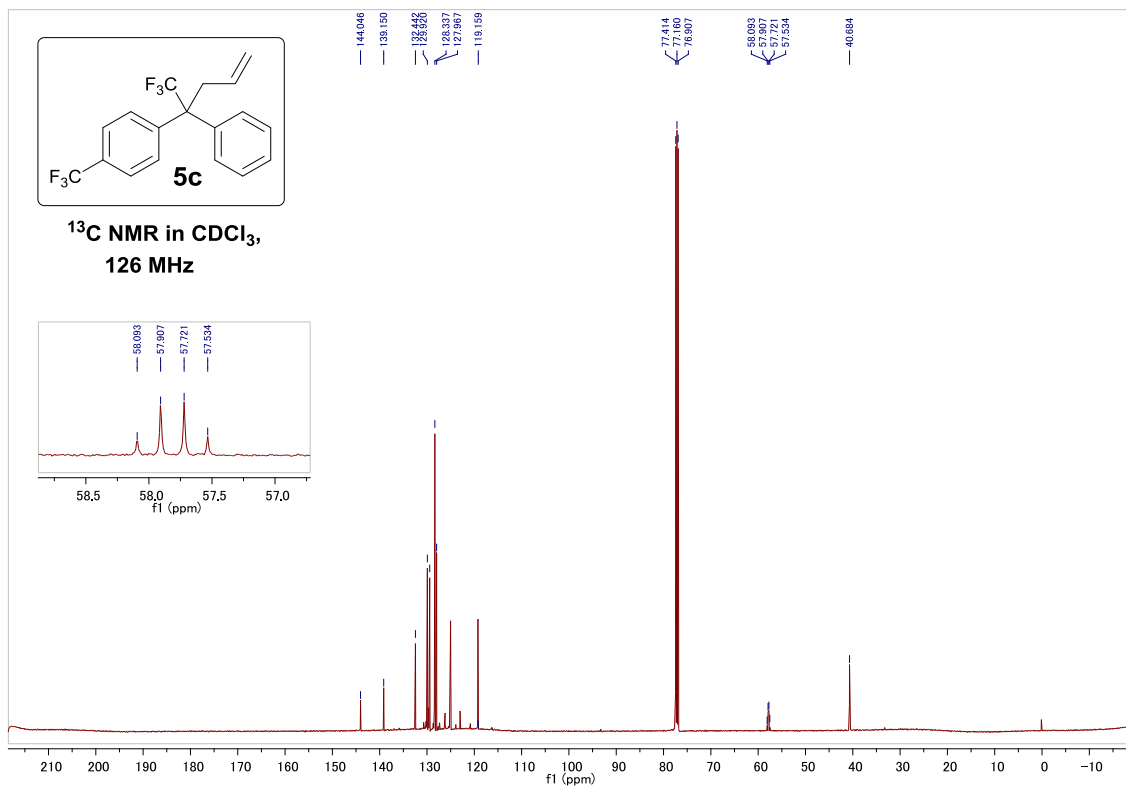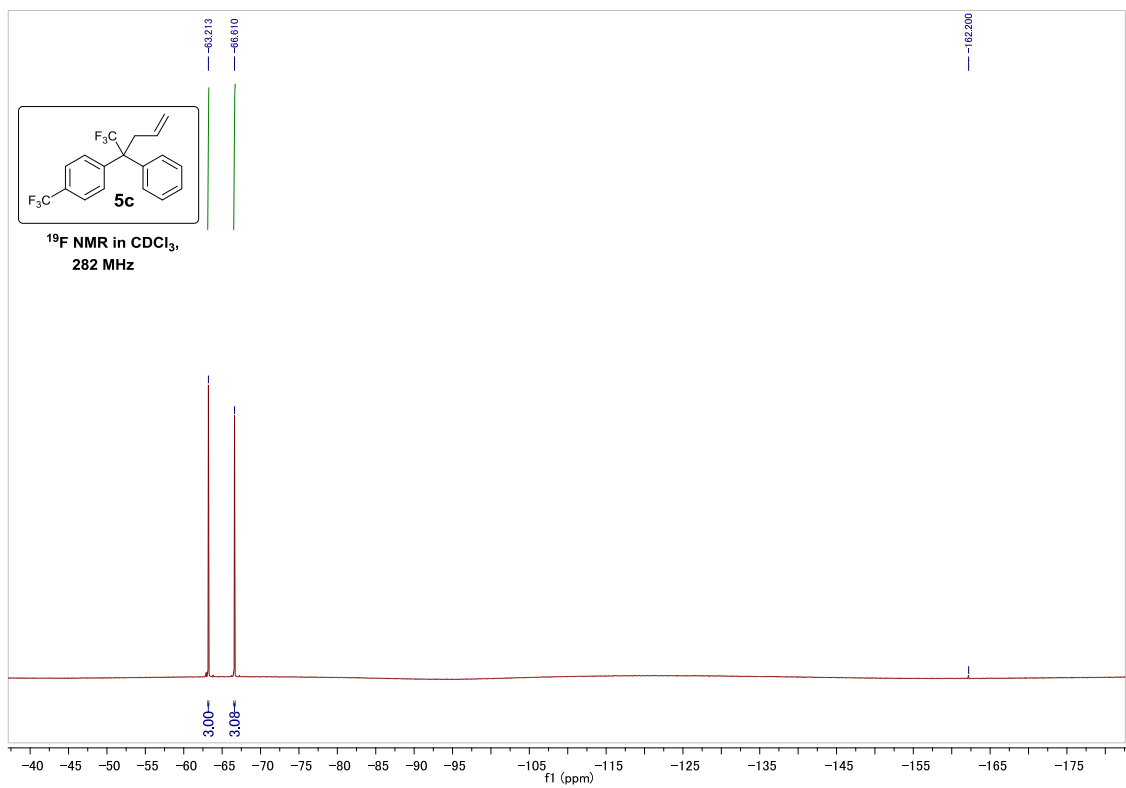



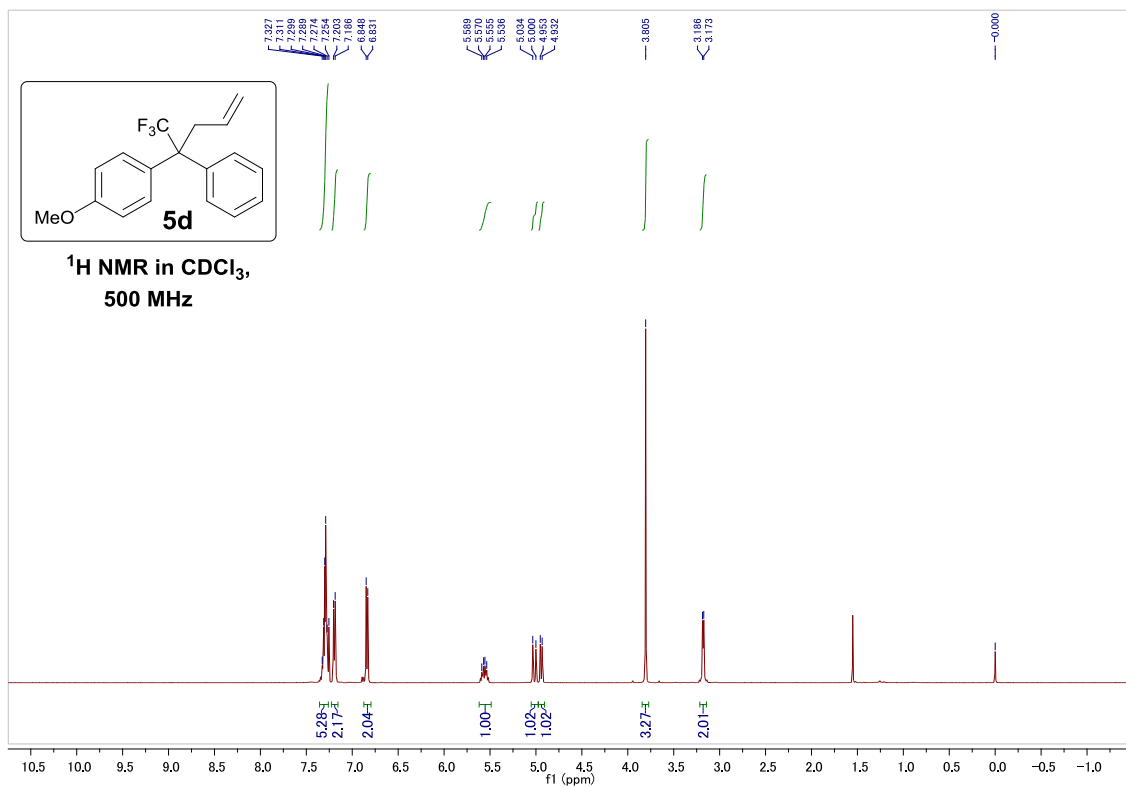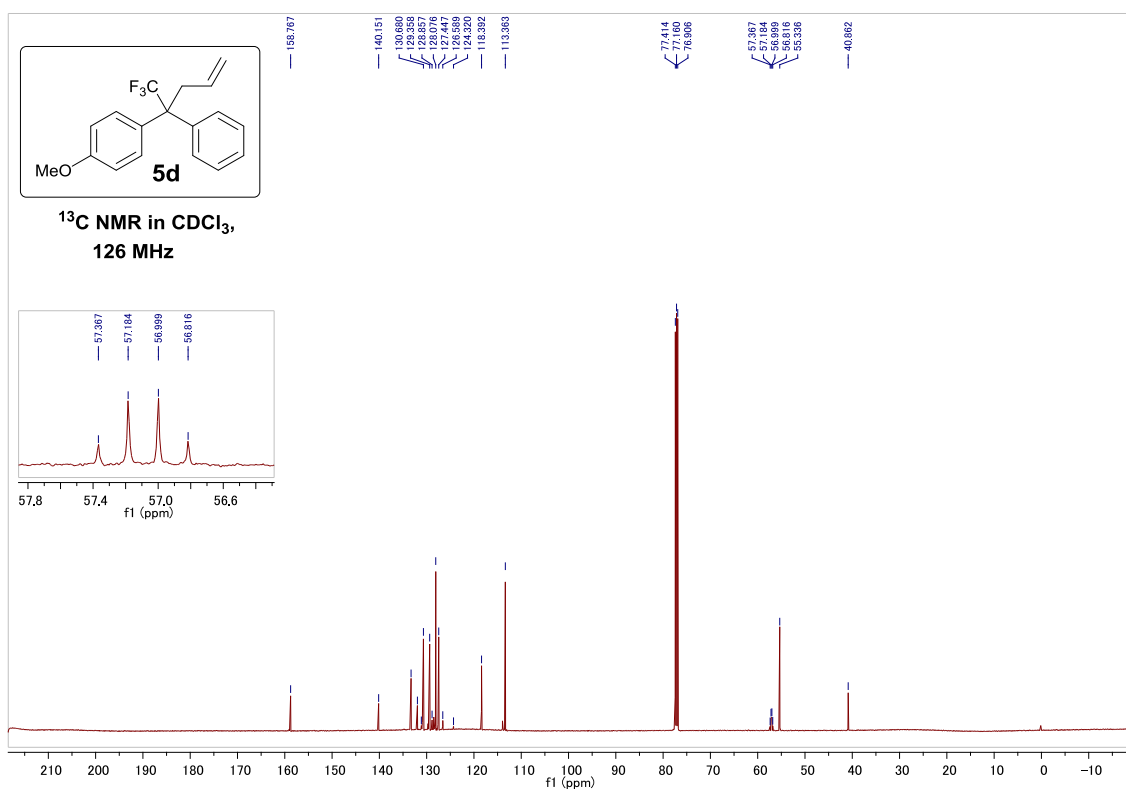

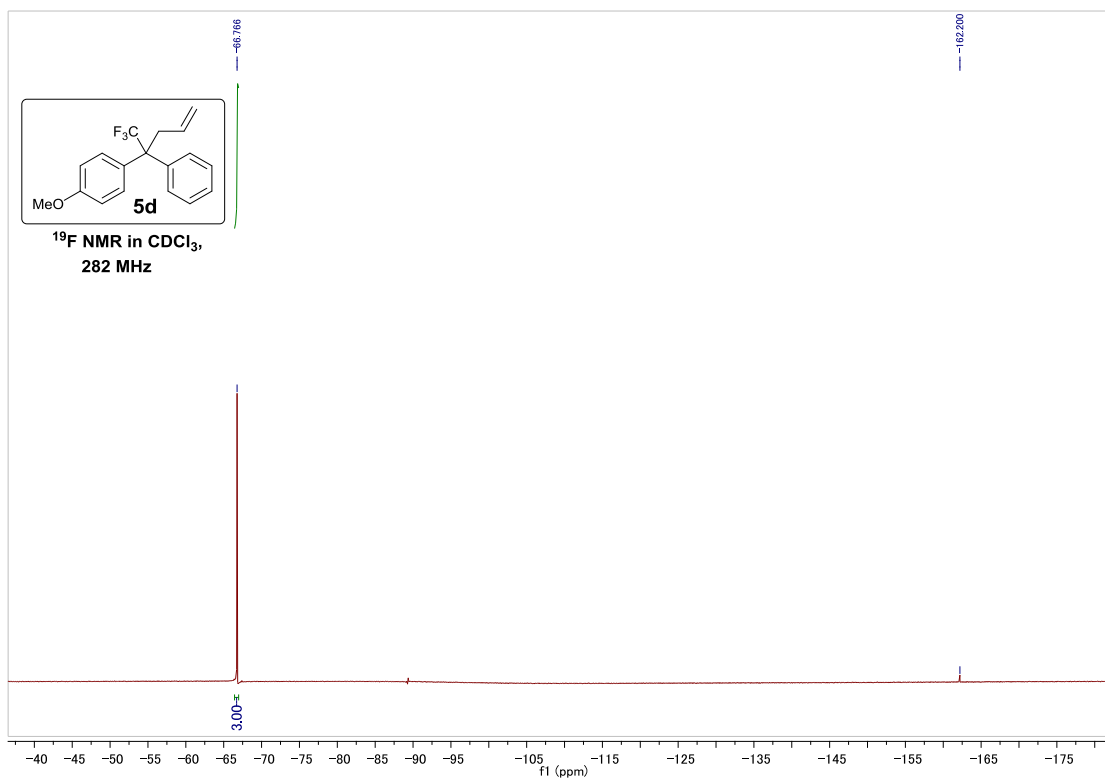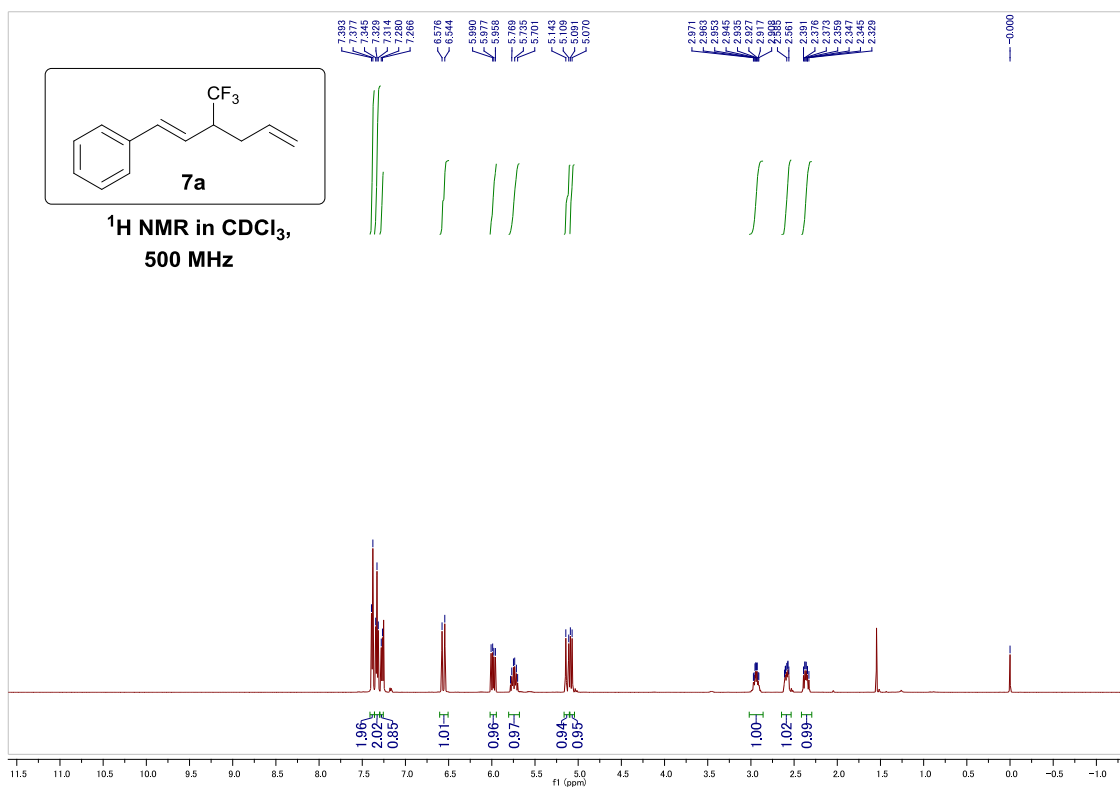

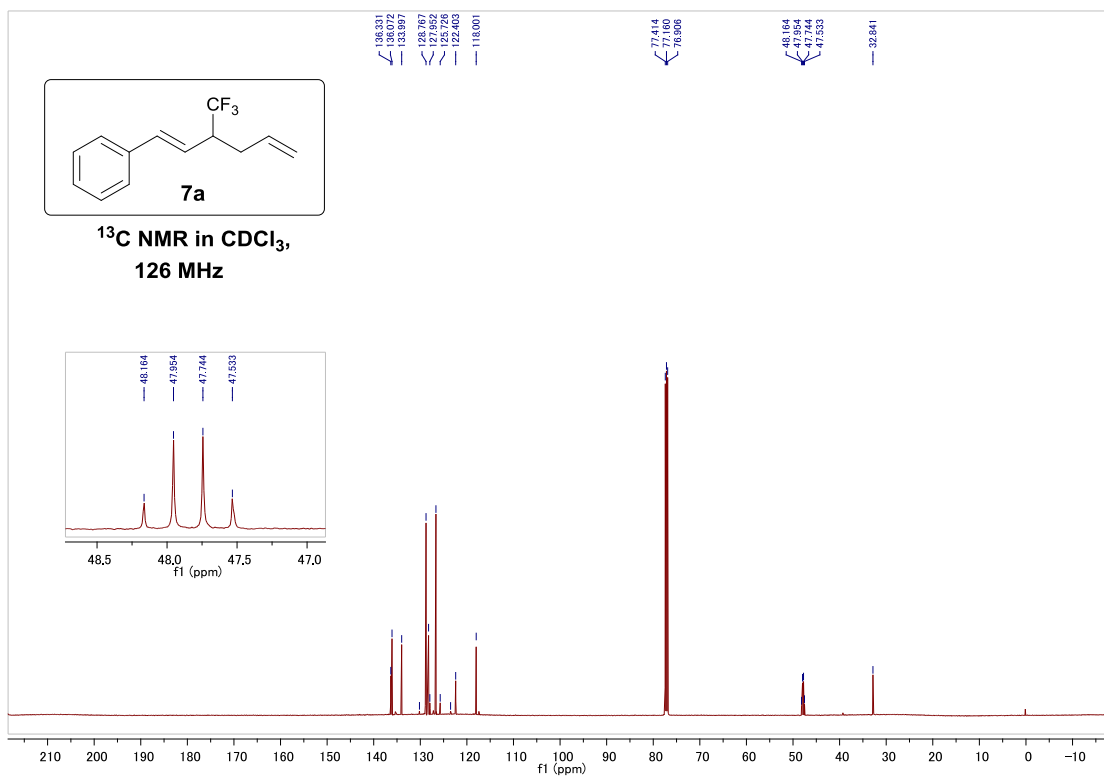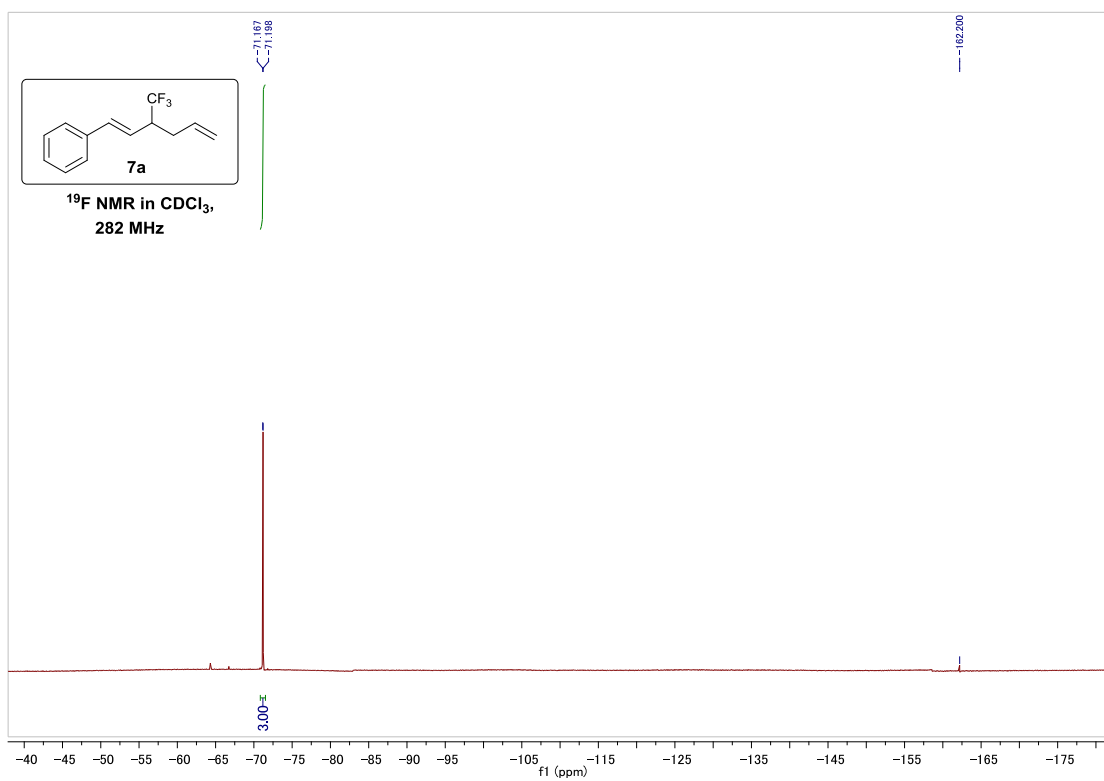

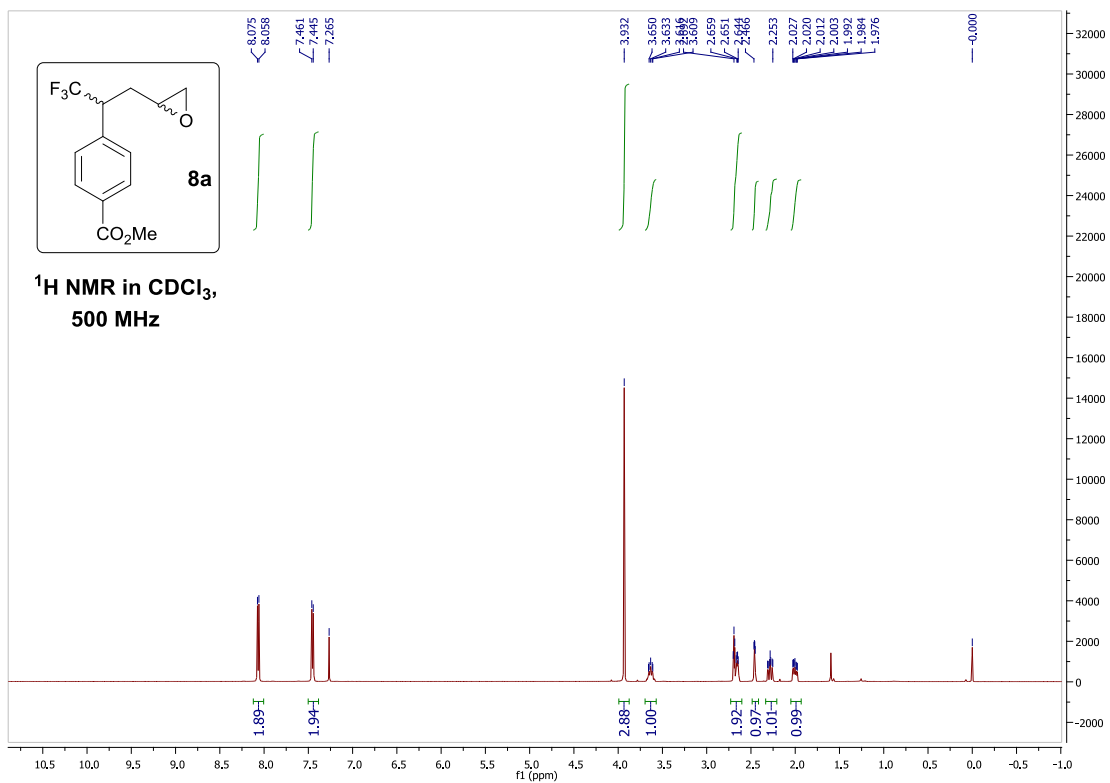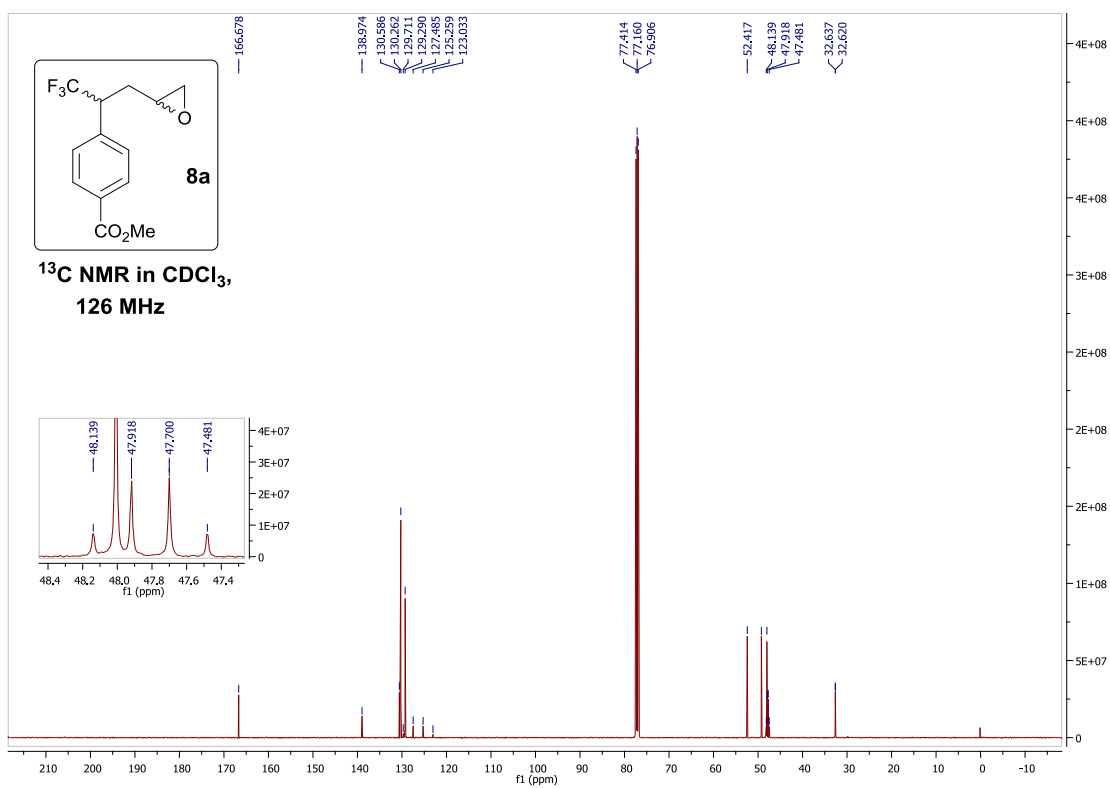

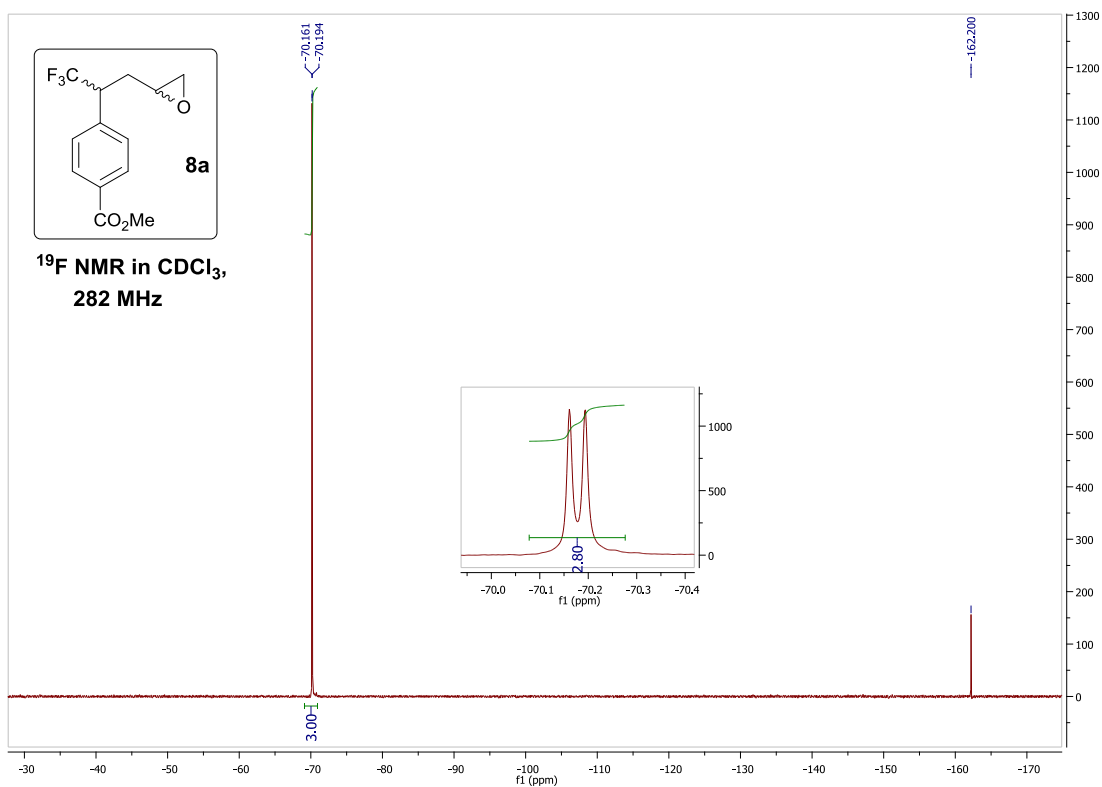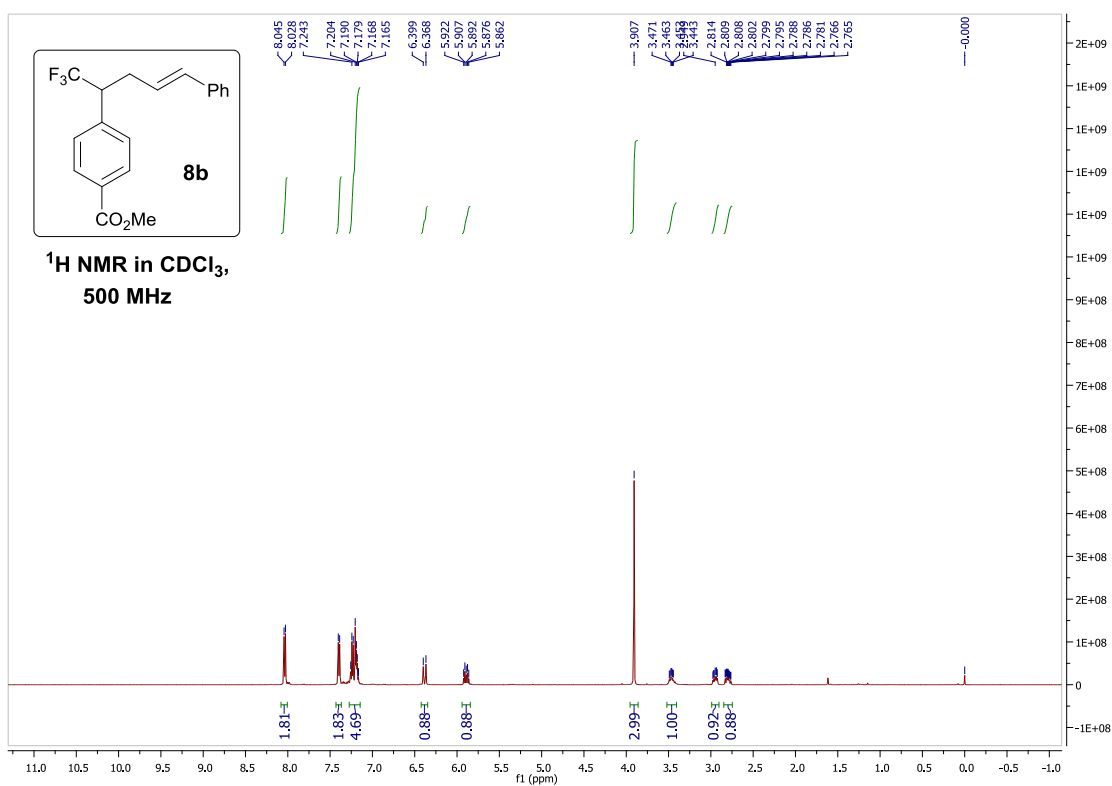

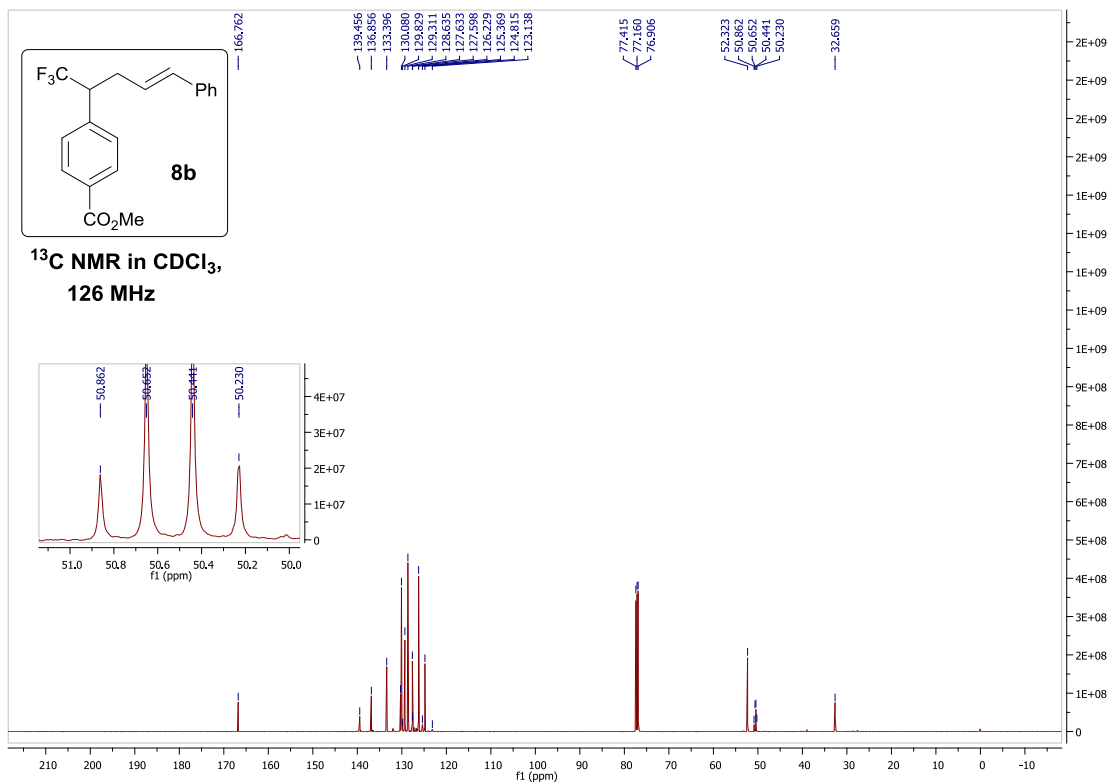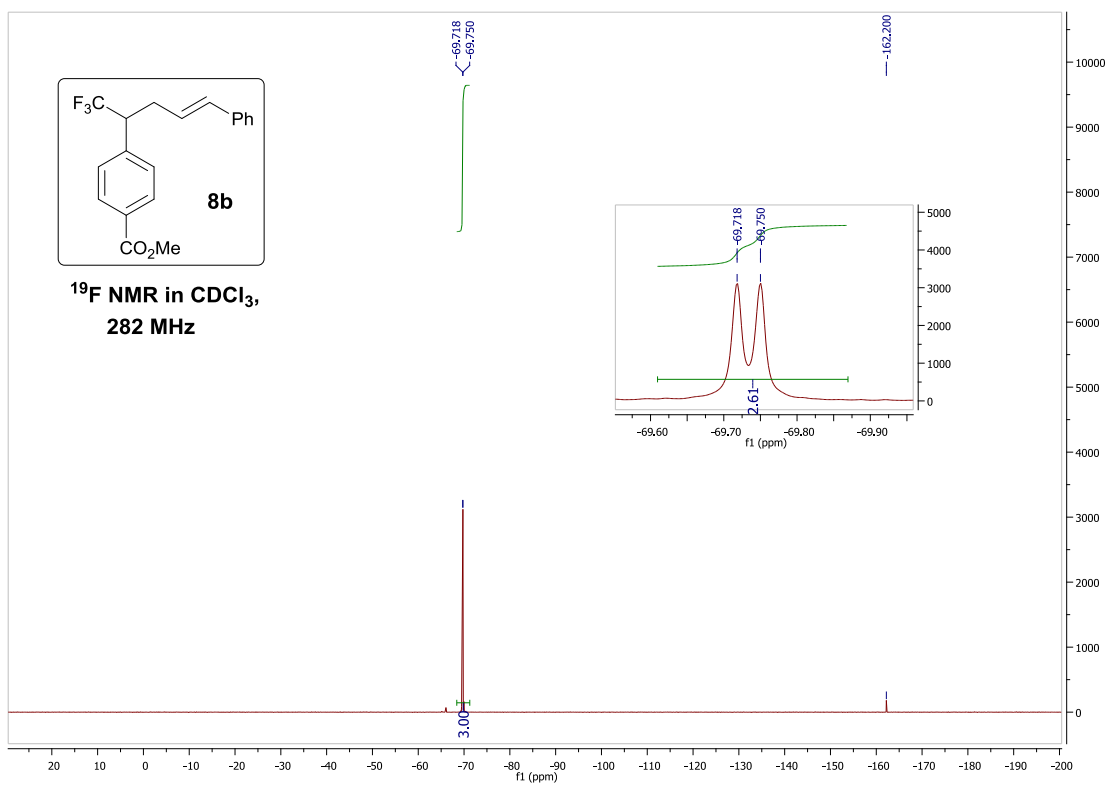

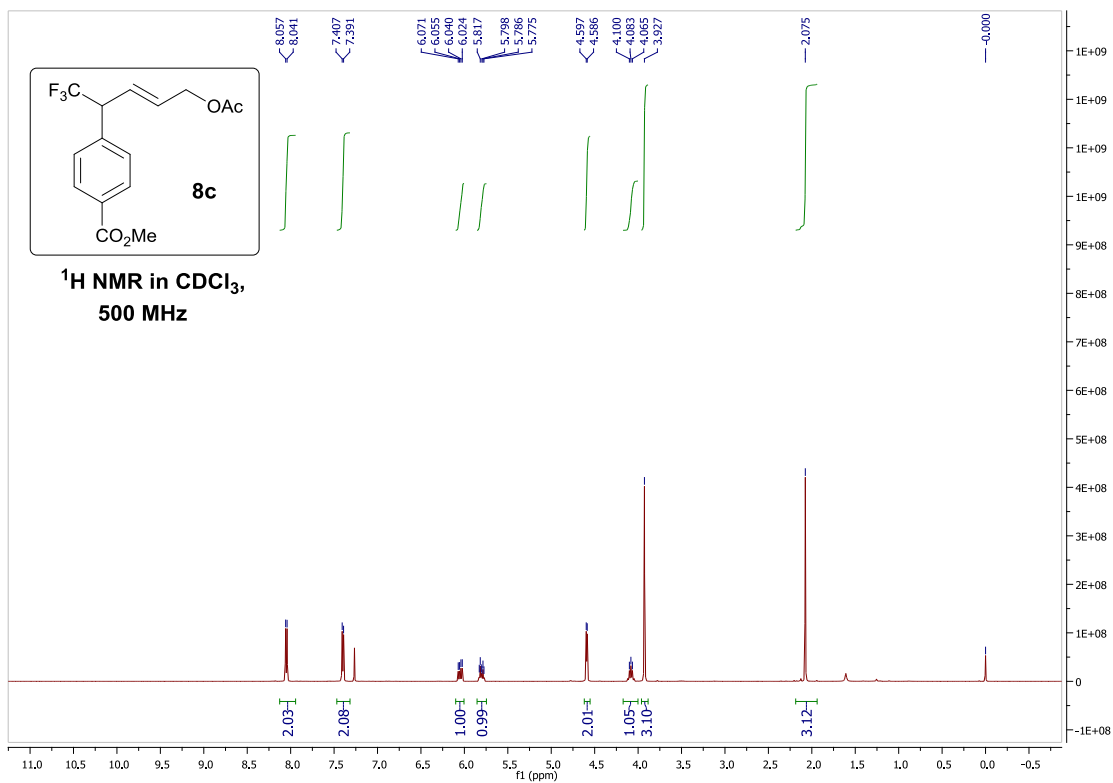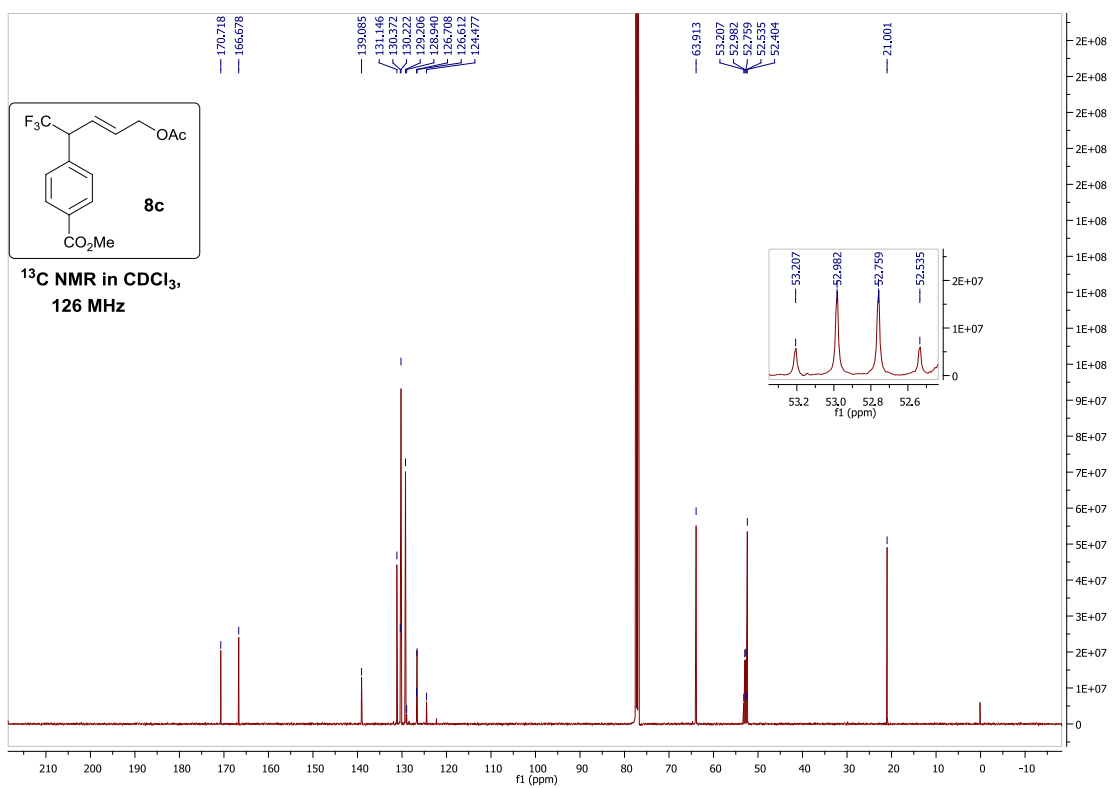

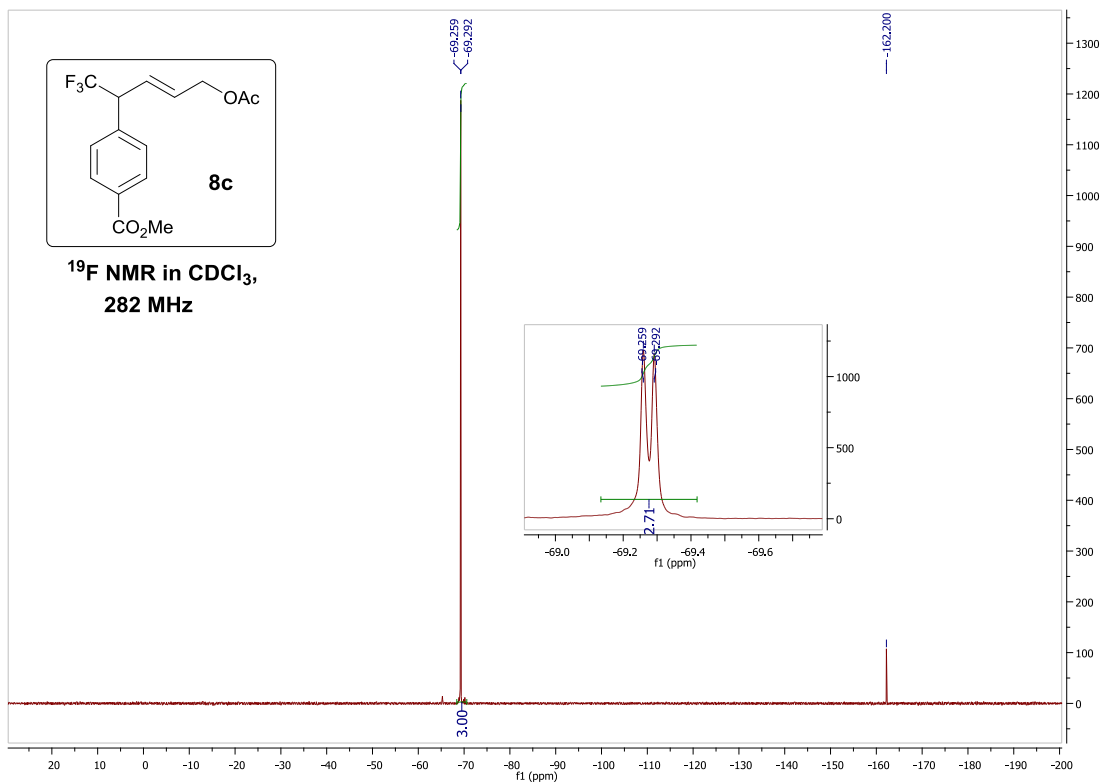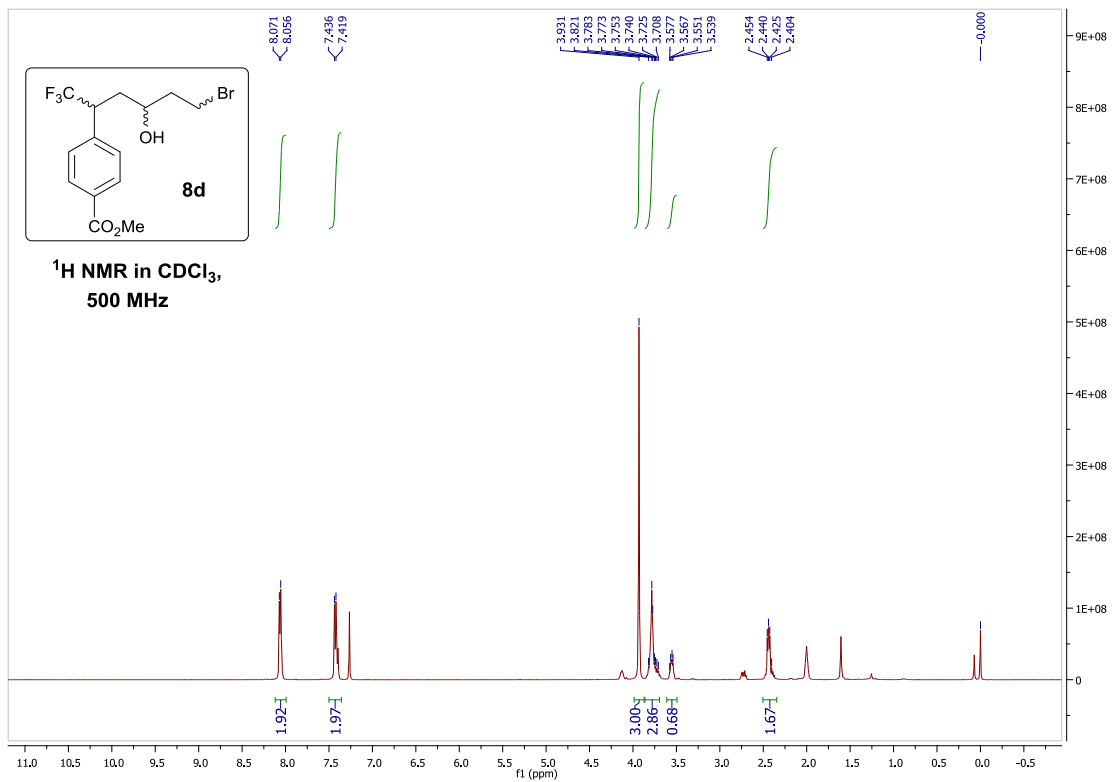



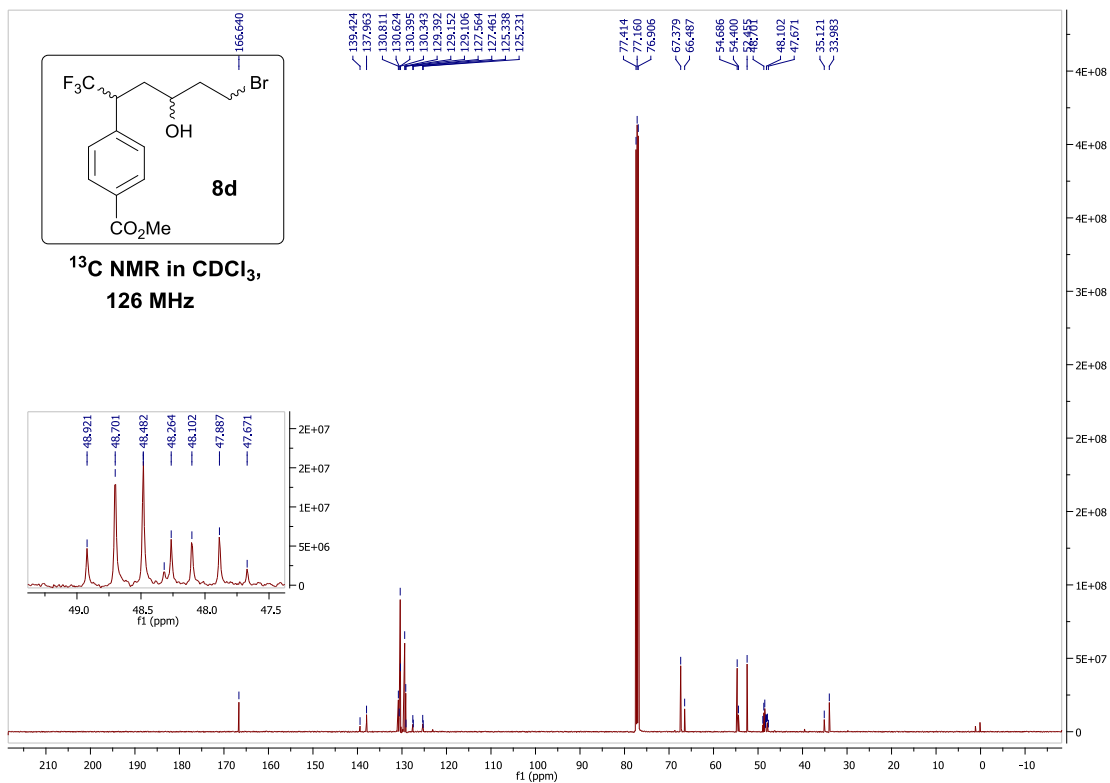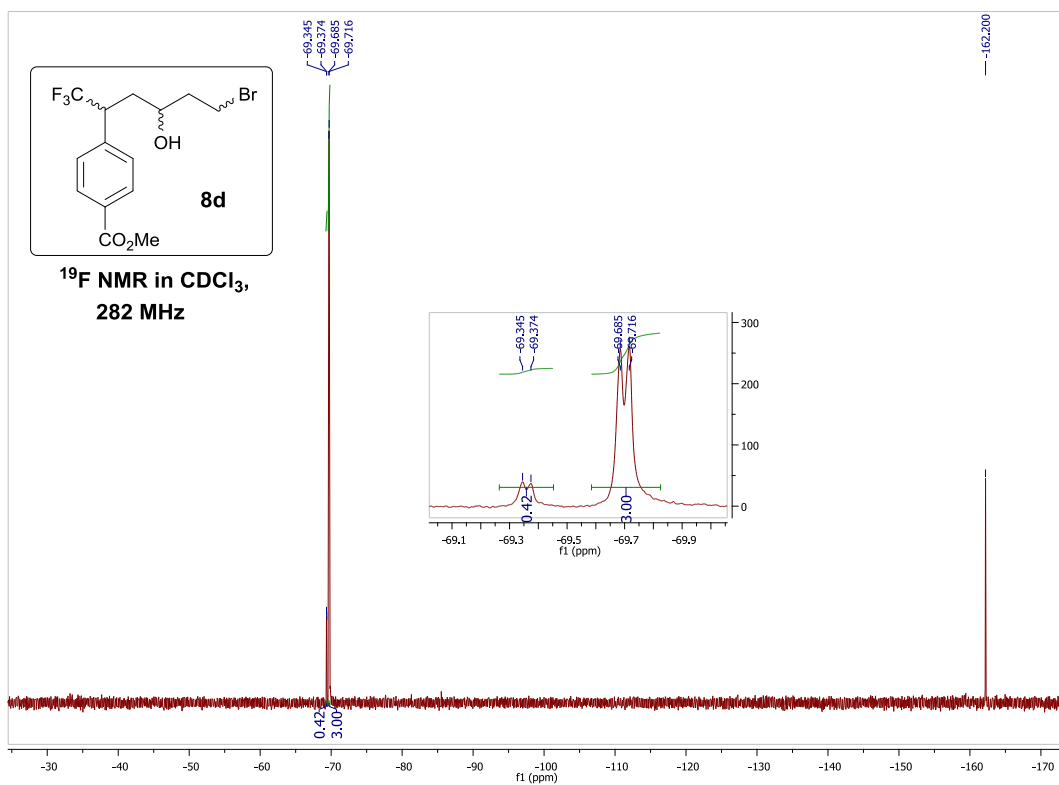

Supplement: c8cc03541e1.pdf [file c8cc03541e1.pdf]
